# Supplementary material for: Structural and evolutionary analyses of the mitochondrial genome of Spuriopimpinella brachycarpa
Source: Front Plant Sci. 2024 Nov 26;15:1492723. doi: 10.3389/fpls.2024.1492723 (PMC11628310; doi:10.3389/fpls.2024.1492723)
Supplement: Supplementary Table 3 — RNA editing sites identified in S. brachycarpa and four related species. [file Table3.xlsx]

## Sheet: Spuriopimpinella brachycarpa
Spuriopimpinella brachycarpa RNA editing sites based on transcriptome
Region	Position	Amino position	Codon change	Amino change	Reference	Substitution	Frequency
atp1	1039	347	CCC→UCC	Pro→Ser	C	U	1
atp1	1059	353	AUC→AUU	Ile→Ile	C	U	0.1
atp1	1064	355	UCG→UUG	Ser→Leu	C	U	1
atp1	1178	393	UCA→UUA	Ser→Leu	C	U	1
atp1	1216	406	CUU→UUU	Leu→Phe	C	U	1
atp1	1292	431	CCG→CUG	Pro→Leu	C	U	1
atp1	1490	497	UCA→UUA	Ser→Leu	C	U	0.99
atp4	56	19	CCA→CUA	Pro→Leu	C	U	0.99
atp4	59	20	UCU→UUU	Ser→Phe	C	U	0.99
atp4	71	24	UCA→UUA	Ser→Leu	C	U	0.99
atp4	89	30	UCA→UUA	Ser→Leu	C	U	0.99
atp4	118	40	CGU→UGU	Arg→Cys	C	U	0.99
atp4	138	46	AUC→AUU	Ile→Ile	C	U	0.98
atp4	144	48	UUC→UUU	Phe→Phe	C	U	0.93
atp4	215	72	UCG→UUG	Ser→Leu	C	U	0.99
atp4	227	76	CCC→CUU	Pro→Leu	C	U	0.99
atp4	228	76	CCC→CUU	Pro→Leu	C	U	0.11
atp4	248	83	CCU→CUU	Pro→Leu	C	U	0.99
atp4	250	84	CCG→UUG	Pro→Leu	C	U	0.92
atp4	251	84	CCG→UUG	Pro→Leu	C	U	0.99
atp4	382	128	CUA→UUA	Leu→Leu	C	U	0.22
atp4	395	132	UCA→UUA	Ser→Leu	C	U	1
atp4	407	136	CCA→CUA	Pro→Leu	C	U	0.99
atp4	416	139	ACU→AUU	Thr→Ile	C	U	0.99
atp4	432	144	AUC→AUU	Ile→Ile	C	U	0.99
atp6	37	13	CCC→UCC	Pro→Ser	C	U	1
atp6	116	39	UCA→UUA	Ser→Leu	C	U	0.99
atp6	167	56	CCG→CUG	Pro→Leu	C	U	0.99
atp6	173	58	CCG→CUG	Pro→Leu	C	U	0.99
atp6	224	75	UCC→UUC	Ser→Phe	C	U	0.99
atp6	229	77	CGC→UGC	Arg→Cys	C	U	0.99
atp6	236	79	UCG→UUG	Ser→Leu	C	U	0.99
atp6	254	85	UCG→UUG	Ser→Leu	C	U	0.99
atp6	258	86	UUC→UUU	Phe→Phe	C	U	0.78
atp6	262	88	CGU→UGU	Arg→Cys	C	U	0.99
atp6	269	90	CCA→CUA	Pro→Leu	C	U	0.99
atp6	401	134	UCA→UUA	Ser→Leu	C	U	0.98
atp6	460	154	CCU→UCU	Pro→Ser	C	U	0.99
atp6	463	155	CAU→UAU	His→Tyr	C	U	0.99
atp6	485	162	UCA→UUA	Ser→Leu	C	U	0.99
atp6	527	176	UCA→UUA	Ser→Leu	C	U	0.99
atp6	635	212	CCG→CUG	Pro→Leu	C	U	0.99
atp6	656	219	UCA→UUA	Ser→Leu	C	U	0.98
atp6	664	222	CAU→UAU	His→Tyr	C	U	0.99
atp6	671	224	UCU→UUU	Ser→Phe	C	U	0.99
atp6	678	226	AUC→AUU	Ile→Ile	C	U	0.82
atp6	680	227	UCA→UUA	Ser→Leu	C	U	0.99
atp6	707	236	ACA→AUA	Thr→Ile	C	U	0.98
atp6	718	240	CAA→UAA	Gln→End	C	U	0.97
atp8	30	10	UUC→UUU	Phe→Phe	C	U	0.23
atp8	47	16	UCA→UUA	Ser→Leu	C	U	0.95
atp8	58	20	CUC→UUC	Leu→Phe	C	U	0.94
atp8	240	80	UCC→UCU	Ser→Ser	C	U	0.93
atp8	470	157	CCA→CUA	Pro→Leu	C	U	0.93
atp8	489	163	UUC→UUU	Phe→Phe	C	U	0.75
atp9	20	7	UCA→UUA	Ser→Leu	C	U	0.99
atp9	205	69	CUG→UUG	Leu→Leu	C	U	0.99
atp9	215	72	UCU→UUU	Ser→Phe	C	U	1
atp9	223	75	CAA→UAA	Gln→End	C	U	0.99
ccmB	28	10	CAU→UAU	His→Tyr	C	U	0.99
ccmB	43	15	CCC→UCC	Pro→Ser	C	U	0.98
ccmB	80	27	UCG→UUG	Ser→Leu	C	U	0.99
ccmB	87	29	AUC→AUU	Ile→Ile	C	U	0.74
ccmB	128	43	UCA→UUA	Ser→Leu	C	U	0.99
ccmB	137	46	UCC→UUU	Ser→Phe	C	U	0.99
ccmB	138	46	UCC→UUU	Ser→Phe	C	U	0.18
ccmB	148	50	CCG→UUG	Pro→Leu	C	U	0.96
ccmB	149	50	CCG→UUG	Pro→Leu	C	U	0.93
ccmB	154	52	CGG→UGG	Arg→Trp	C	U	0.98
ccmB	160	54	CCU→UCU	Pro→Ser	C	U	0.97
ccmB	164	55	CCG→CUG	Pro→Leu	C	U	0.99
ccmB	172	58	CCU→UCU	Pro→Ser	C	U	0.99
ccmB	179	60	CCU→CUU	Pro→Leu	C	U	0.96
ccmB	193	65	CCU→UUU	Pro→Phe	C	U	0.98
ccmB	194	65	CCU→UUU	Pro→Phe	C	U	0.97
ccmB	304	102	CGU→UGU	Arg→Cys	C	U	1
ccmB	313	105	CGU→UGU	Arg→Cys	C	U	1
ccmB	324	108	CCC→CCU	Pro→Pro	C	U	0.24
ccmB	337	113	CCG→UUG	Pro→Leu	C	U	0.52
ccmB	338	113	CCG→UUG	Pro→Leu	C	U	1
ccmB	367	123	CGG→UGG	Arg→Trp	C	U	0.99
ccmB	380	127	CCA→CUA	Pro→Leu	C	U	0.97
ccmB	424	142	CGU→UGU	Arg→Cys	C	U	0.98
ccmB	428	143	UCG→UUG	Ser→Leu	C	U	0.99
ccmB	467	156	UCG→UUG	Ser→Leu	C	U	0.98
ccmB	475	159	CCA→UUA	Pro→Leu	C	U	0.99
ccmB	476	159	CCA→UUA	Pro→Leu	C	U	0.99
ccmB	485	162	UCA→UUA	Ser→Leu	C	U	0.99
ccmB	494	165	UCA→UUA	Ser→Leu	C	U	0.98
ccmB	501	167	CCC→CCU	Pro→Pro	C	U	0.11
ccmB	502	168	CCA→UUA	Pro→Leu	C	U	0.2
ccmB	503	168	CCA→UUA	Pro→Leu	C	U	0.98
ccmB	512	171	UCU→UUU	Ser→Phe	C	U	0.89
ccmB	514	172	CGU→UGU	Arg→Cys	C	U	0.98
ccmB	551	184	UCA→UUA	Ser→Leu	C	U	0.99
ccmB	554	185	UCG→UUG	Ser→Leu	C	U	1
ccmB	566	189	UCC→UUC	Ser→Phe	C	U	0.98
ccmB	569	190	UCU→UUU	Ser→Phe	C	U	0.99
ccmB	572	191	CCG→CUG	Pro→Leu	C	U	0.99
ccmB	587	196	UCU→UUU	Ser→Phe	C	U	0.92
ccmB	611	204	UCA→UUA	Ser→Leu	C	U	1
ccmC	5	2	UCC→UUC	Ser→Phe	C	U	0.92
ccmC	54	18	UAC→UAU	Tyr→Tyr	C	U	0.86
ccmC	76	26	CGG→UGG	Arg→Trp	C	U	0.87
ccmC	84	28	UUC→UUU	Phe→Phe	C	U	0.18
ccmC	103	35	CAU→UAU	His→Tyr	C	U	0.91
ccmC	115	39	CGG→UGG	Arg→Trp	C	U	0.96
ccmC	133	45	CUU→UUU	Leu→Phe	C	U	0.85
ccmC	161	54	CCG→CUG	Pro→Leu	C	U	0.98
ccmC	179	60	GCG→GUG	Ala→Val	C	U	0.98
ccmC	184	62	CGG→UGG	Arg→Trp	C	U	0.96
ccmC	281	94	ACA→AUA	Thr→Ile	C	U	0.98
ccmC	299	100	UCU→UUU	Ser→Phe	C	U	0.95
ccmC	331	111	CGG→UGG	Arg→Trp	C	U	0.97
ccmC	358	120	CGG→UGG	Arg→Trp	C	U	0.95
ccmC	395	132	UCG→UUG	Ser→Leu	C	U	0.98
ccmC	399	133	UUC→UUU	Phe→Phe	C	U	0.98
ccmC	400	134	CUU→UUU	Leu→Phe	C	U	0.95
ccmC	418	140	CUG→UUG	Leu→Leu	C	U	0.95
ccmC	421	141	CGU→UGU	Arg→Cys	C	U	0.97
ccmC	446	149	CCG→CUG	Pro→Leu	C	U	0.98
ccmC	451	151	CCU→UCU	Pro→Ser	C	U	0.95
ccmC	458	153	UCA→UUA	Ser→Leu	C	U	0.98
ccmC	463	155	CGU→UGU	Arg→Cys	C	U	0.97
ccmC	473	158	CCA→CUA	Pro→Leu	C	U	0.97
ccmC	477	159	AUC→AUU	Ile→Ile	C	U	0.53
ccmC	497	166	UCU→UUU	Ser→Phe	C	U	0.94
ccmC	521	174	UCG→UUG	Ser→Leu	C	U	0.93
ccmC	548	183	UCU→UUU	Ser→Phe	C	U	0.95
ccmC	568	190	CCU→UCU	Pro→Ser	C	U	0.97
ccmC	575	192	CCC→CUC	Pro→Leu	C	U	0.96
ccmC	605	202	UCC→UUU	Ser→Phe	C	U	0.78
ccmC	606	202	UCC→UUU	Ser→Phe	C	U	0.39
ccmC	608	203	CCC→CUC	Pro→Leu	C	U	0.98
ccmC	612	204	UUC→UUU	Phe→Phe	C	U	0.15
ccmC	614	205	UCA→UUA	Ser→Leu	C	U	0.93
ccmC	618	206	ACC→ACU	Thr→Thr	C	U	0.65
ccmC	619	207	CGU→UGU	Arg→Cys	C	U	0.98
ccmC	624	208	AUC→AUU	Ile→Ile	C	U	0.2
ccmC	630	210	UUC→UUU	Phe→Phe	C	U	0.76
ccmC	650	217	CCU→CUU	Pro→Leu	C	U	0.96
ccmC	656	219	CCA→CUA	Pro→Leu	C	U	0.99
ccmFC	38	13	UCC→UUU	Ser→Phe	C	U	0.86
ccmFC	39	13	UCC→UUU	Ser→Phe	C	U	0.35
ccmFC	50	17	CCU→CUU	Pro→Leu	C	U	0.91
ccmFC	52	18	CGU→UGU	Arg→Cys	C	U	0.91
ccmFC	103	35	CCC→UUC	Pro→Phe	C	U	0.97
ccmFC	104	35	CCC→UUC	Pro→Phe	C	U	0.12
ccmFC	119	40	UCU→UUU	Ser→Phe	C	U	0.88
ccmFC	122	41	UCC→UUU	Ser→Phe	C	U	0.91
ccmFC	123	41	UCC→UUU	Ser→Phe	C	U	0.17
ccmFC	146	49	CCU→CUU	Pro→Leu	C	U	0.93
ccmFC	151	51	CCU→UCU	Pro→Ser	C	U	0.92
ccmFC	155	52	UCA→UUA	Ser→Leu	C	U	0.91
ccmFC	161	54	CCU→CUU	Pro→Leu	C	U	0.91
ccmFC	175	59	CUA→UUA	Leu→Leu	C	U	0.64
ccmFC	231	77	GUC→GUU	Val→Val	C	U	0.41
ccmFC	310	104	CGU→UGU	Arg→Cys	C	U	0.93
ccmFC	321	107	CCC→CCU	Pro→Pro	C	U	0.26
ccmFC	333	111	UUC→UUU	Phe→Phe	C	U	0.11
ccmFC	334	112	CUU→UUU	Leu→Phe	C	U	0.58
ccmFC	342	114	CUC→CUU	Leu→Leu	C	U	0.44
ccmFC	363	121	UCC→UCU	Ser→Ser	C	U	0.19
ccmFC	391	131	CGU→UGU	Arg→Cys	C	U	0.98
ccmFC	406	136	CGU→UGU	Arg→Cys	C	U	0.97
ccmFC	697	233	CCA→UUA	Pro→Leu	C	U	0.98
ccmFC	698	233	CCA→UUA	Pro→Leu	C	U	1
ccmFC	735	245	AUC→AUU	Ile→Ile	C	U	0.13
ccmFC	846	282	CUC→CUU	Leu→Leu	C	U	0.38
ccmFC	869	290	UCU→UUU	Ser→Phe	C	U	0.97
ccmFC	1068	356	UUC→UUU	Phe→Phe	C	U	0.41
ccmFC	1130	377	CCA→CUA	Pro→Leu	C	U	0.97
ccmFC	1150	384	CCG→UUG	Pro→Leu	C	U	0.99
ccmFC	1151	384	CCG→UUG	Pro→Leu	C	U	0.92
ccmFC	1225	409	CGG→UGG	Arg→Trp	C	U	0.86
ccmFC	1259	420	UCG→UUG	Ser→Leu	C	U	0.99
ccmFC	1306	436	CGA→UGA	Arg→End	C	U	0.97
ccmFN	38	13	CCG→CUG	Pro→Leu	C	U	0.81
ccmFN	126	42	UUC→UUU	Phe→Phe	C	U	0.14
ccmFN	137	46	UCG→UUG	Ser→Leu	C	U	0.87
ccmFN	142	48	CGU→UGU	Arg→Cys	C	U	0.85
ccmFN	151	51	CCU→UCU	Pro→Ser	C	U	0.83
ccmFN	165	55	UCC→UCU	Ser→Ser	C	U	0.21
ccmFN	183	61	ACC→ACU	Thr→Thr	C	U	0.24
ccmFN	248	83	UCA→UUA	Ser→Leu	C	U	0.87
ccmFN	256	86	CGG→UGG	Arg→Trp	C	U	0.81
ccmFN	283	95	CUU→UUU	Leu→Phe	C	U	0.87
ccmFN	365	122	UCG→UUG	Ser→Leu	C	U	0.88
ccmFN	372	124	UUC→UUU	Phe→Phe	C	U	0.78
ccmFN	504	168	GCC→GCU	Ala→Ala	C	U	0.21
ccmFN	524	175	CCG→CUG	Pro→Leu	C	U	0.34
ccmFN	531	177	UAC→UAU	Tyr→Tyr	C	U	0.14
ccmFN	695	232	CCU→CUU	Pro→Leu	C	U	0.95
ccmFN	704	235	UCA→UUA	Ser→Leu	C	U	0.94
ccmFN	714	238	UCC→UCU	Ser→Ser	C	U	0.2
ccmFN	742	248	CGU→UGU	Arg→Cys	C	U	0.92
ccmFN	747	249	ACC→ACU	Thr→Thr	C	U	0.11
ccmFN	764	255	UCA→UUA	Ser→Leu	C	U	0.92
ccmFN	776	259	CCA→CUA	Pro→Leu	C	U	0.94
ccmFN	791	264	UCA→UUA	Ser→Leu	C	U	0.91
ccmFN	940	314	CGC→UGC	Arg→Cys	C	U	0.97
ccmFN	1175	392	UCG→UUG	Ser→Leu	C	U	0.67
ccmFN	1258	420	CGG→UGG	Arg→Trp	C	U	0.95
ccmFN	1286	429	CCA→CUA	Pro→Leu	C	U	0.96
ccmFN	1303	435	CAU→UAU	His→Tyr	C	U	0.98
ccmFN	1318	440	CGG→UGG	Arg→Trp	C	U	0.98
ccmFN	1336	446	CGG→UGG	Arg→Trp	C	U	0.98
ccmFN	1369	457	CGG→UGG	Arg→Trp	C	U	0.97
ccmFN	1387	463	CGU→UGU	Arg→Cys	C	U	0.98
ccmFN	1430	477	UCG→UUG	Ser→Leu	C	U	0.96
ccmFN	1435	479	CUU→UUU	Leu→Phe	C	U	0.1
ccmFN	1450	484	CUU→UUU	Leu→Phe	C	U	0.98
ccmFN	1454	485	CCA→CUA	Pro→Leu	C	U	0.95
ccmFN	1466	489	UCA→UUA	Ser→Leu	C	U	0.95
ccmFN	1475	492	UCU→UUU	Ser→Phe	C	U	0.94
ccmFN	1501	501	CCC→UCC	Pro→Ser	C	U	0.95
ccmFN	1684	562	CGC→UGC	Arg→Cys	C	U	0.19
cob	118	40	CCG→UCG	Pro→Ser	C	U	0.99
cob	286	96	CUC→UUC	Leu→Phe	C	U	0.99
cob	298	100	CAC→UAC	His→Tyr	C	U	0.98
cob	358	120	CGG→UGG	Arg→Trp	C	U	0.99
cob	419	140	CCA→CUA	Pro→Leu	C	U	0.99
cob	680	227	UCU→UUU	Ser→Phe	C	U	0.99
cob	737	246	UCU→UUU	Ser→Phe	C	U	0.98
cob	808	270	CCC→UCU	Pro→Ser	C	U	0.99
cob	810	270	CCC→UCU	Pro→Ser	C	U	0.13
cob	853	285	CAU→UAU	His→Tyr	C	U	0.98
cob	908	303	CCA→CUA	Pro→Leu	C	U	0.99
cob	1018	340	CGC→UGC	Arg→Cys	C	U	0.99
cob	1087	363	CCU→UCU	Pro→Ser	C	U	0.99
cob	1127	376	CCG→CUG	Pro→Leu	C	U	0.99
cox1	2	1	ACG→AUG	Thr→Met	C	U	0.99
cox1	11	4	CCG→CUG	Pro→Leu	C	U	0.97
cox1	15	5	GUC→GUU	Val→Val	C	U	0.77
cox1	242	81	UCU→UUU	Ser→Phe	C	U	1
cox1	254	85	UCU→UUU	Ser→Phe	C	U	0.99
cox1	352	118	CCA→UCA	Pro→Ser	C	U	0.99
cox1	443	148	UCA→UUA	Ser→Leu	C	U	0.99
cox1	452	151	UCU→UUU	Ser→Phe	C	U	0.99
cox1	458	153	CCU→CUU	Pro→Leu	C	U	0.99
cox1	515	172	UCC→UUC	Ser→Phe	C	U	1
cox1	551	184	UCA→UUA	Ser→Leu	C	U	1
cox1	570	190	UCC→UCU	Ser→Ser	C	U	0.23
cox1	590	197	CCA→CUA	Pro→Leu	C	U	0.99
cox1	668	223	UCU→UUU	Ser→Phe	C	U	1
cox1	715	239	CGG→UGG	Arg→Trp	C	U	0.99
cox1	746	249	CCC→CUC	Pro→Leu	C	U	1
cox1	761	254	UCC→UUC	Ser→Phe	C	U	1
cox1	1037	346	UCC→UUC	Ser→Phe	C	U	1
cox1	1079	360	CCG→CUG	Pro→Leu	C	U	0.99
cox1	1186	396	CAC→UAC	His→Tyr	C	U	1
cox1	1274	425	CCG→CUG	Pro→Leu	C	U	0.99
cox1	1405	469	CGU→UGU	Arg→Cys	C	U	0.99
cox1	1433	478	UCA→UUA	Ser→Leu	C	U	1
cox1	1489	497	CCA→UCA	Pro→Ser	C	U	0.98
cox1	1499	500	CCG→CUG	Pro→Leu	C	U	0.99
cox2	9	3	UUC→UUU	Phe→Phe	C	U	0.99
cox2	74	25	UCU→UUU	Ser→Phe	C	U	0.99
cox2	141	47	CUC→CUU	Leu→Leu	C	U	0.68
cox2	164	55	UCA→UUA	Ser→Leu	C	U	1
cox2	166	56	CGG→UGG	Arg→Trp	C	U	0.99
cox2	256	86	CGG→UGG	Arg→Trp	C	U	1
cox2	281	94	CCG→CUG	Pro→Leu	C	U	0.99
cox2	382	128	CGG→UGG	Arg→Trp	C	U	0.99
cox2	446	149	ACG→AUG	Thr→Met	C	U	1
cox2	464	155	CCA→CUA	Pro→Leu	C	U	1
cox2	479	160	UCA→UUA	Ser→Leu	C	U	1
cox2	560	187	CCU→CUU	Pro→Leu	C	U	0.99
cox2	584	195	UCA→UUA	Ser→Leu	C	U	1
cox2	635	212	UCG→UUG	Ser→Leu	C	U	1
cox2	701	234	ACG→AUG	Thr→Met	C	U	1
cox2	745	249	CGG→UGG	Arg→Trp	C	U	0.99
cox3	112	38	CCA→UCA	Pro→Ser	C	U	0.99
cox3	174	58	UUC→UUU	Phe→Phe	C	U	0.15
cox3	245	82	CCU→CUU	Pro→Leu	C	U	1
cox3	289	97	CUU→UUU	Leu→Phe	C	U	0.99
cox3	298	100	CUU→UUU	Leu→Phe	C	U	0.99
cox3	311	104	UCU→UUU	Ser→Phe	C	U	0.98
cox3	314	105	UCU→UUU	Ser→Phe	C	U	0.99
cox3	422	141	CCU→CUU	Pro→Leu	C	U	0.99
cox3	512	171	UCA→UUA	Ser→Leu	C	U	0.99
cox3	566	189	UCC→UUU	Ser→Phe	C	U	0.99
cox3	567	189	UCC→UUU	Ser→Phe	C	U	0.28
cox3	754	252	CGG→UGG	Arg→Trp	C	U	1
cox3	764	255	CCA→CUA	Pro→Leu	C	U	1
matR	32	11	UCC→UUC	Ser→Phe	C	U	0.99
matR	43	15	CCC→UCC	Pro→Ser	C	U	0.99
matR	147	49	UUC→UUU	Phe→Phe	C	U	0.86
matR	193	65	CCA→UCA	Pro→Ser	C	U	0.99
matR	235	79	CCC→UUC	Pro→Phe	C	U	0.99
matR	236	79	CCC→UUC	Pro→Phe	C	U	0.58
matR	326	109	CCA→CUA	Pro→Leu	C	U	0.9
matR	413	138	UCG→UUG	Ser→Leu	C	U	0.71
matR	445	149	CAA→UAA	Gln→End	C	U	0.52
matR	1545	515	CCC→CCU	Pro→Pro	C	U	0.81
matR	1679	560	UCC→UUC	Ser→Phe	C	U	0.93
matR	1700	567	CCU→CUU	Pro→Leu	C	U	0.93
matR	1720	574	CGC→UGC	Arg→Cys	C	U	0.93
matR	1734	578	UAC→UAU	Tyr→Tyr	C	U	0.87
matR	1756	586	CAC→UAC	His→Tyr	C	U	0.96
matR	1787	596	CCG→CUG	Pro→Leu	C	U	0.96
matR	1826	609	CCA→CUA	Pro→Leu	C	U	0.96
matR	1844	615	UCA→UUA	Ser→Leu	C	U	0.96
mttB	29	10	CCU→CUU	Pro→Leu	C	U	0.16
mttB	61	21	CAU→UAU	His→Tyr	C	U	0.24
mttB	71	24	CCG→CUG	Pro→Leu	C	U	0.97
mttB	109	37	CGG→UGG	Arg→Trp	C	U	0.98
mttB	145	49	CGU→UGU	Arg→Cys	C	U	0.99
mttB	156	52	UUC→UUU	Phe→Phe	C	U	0.41
mttB	157	53	CCG→UCG	Pro→Ser	C	U	0.62
mttB	173	58	UCU→UUU	Ser→Phe	C	U	0.99
mttB	175	59	CCA→UUA	Pro→Leu	C	U	0.37
mttB	176	59	CCA→UUA	Pro→Leu	C	U	0.99
mttB	223	75	CGU→UGU	Arg→Cys	C	U	0.98
mttB	233	78	UCA→UUA	Ser→Leu	C	U	0.99
mttB	245	82	UCC→UUC	Ser→Phe	C	U	0.98
mttB	247	83	CCG→UCG	Pro→Ser	C	U	0.98
mttB	268	90	CCA→UCA	Pro→Ser	C	U	0.99
mttB	281	94	UCU→UUU	Ser→Phe	C	U	0.86
mttB	288	96	UUC→UUU	Phe→Phe	C	U	0.67
mttB	297	99	CCC→CCU	Pro→Pro	C	U	0.15
mttB	307	103	CAU→UAU	His→Tyr	C	U	0.88
mttB	330	110	AUC→AUU	Ile→Ile	C	U	0.1
mttB	373	125	CUC→UUC	Leu→Phe	C	U	0.99
mttB	376	126	CAU→UAU	His→Tyr	C	U	1
mttB	389	130	UCU→UUU	Ser→Phe	C	U	0.99
mttB	391	131	CGC→UGC	Arg→Cys	C	U	0.99
mttB	396	132	UUC→UUU	Phe→Phe	C	U	0.49
mttB	399	133	UCC→UCU	Ser→Ser	C	U	0.13
mttB	412	138	CUA→UUA	Leu→Leu	C	U	0.11
mttB	418	140	CUU→UUU	Leu→Phe	C	U	0.99
mttB	421	141	CCC→UCC	Pro→Ser	C	U	0.5
mttB	424	142	CGG→UGG	Arg→Trp	C	U	0.93
mttB	452	151	CCA→CUA	Pro→Leu	C	U	0.99
mttB	482	161	UCG→UUG	Ser→Leu	C	U	1
mttB	492	164	AUC→AUU	Ile→Ile	C	U	0.12
mttB	517	173	CAU→UAU	His→Tyr	C	U	0.99
mttB	542	181	UCG→UUG	Ser→Leu	C	U	0.99
mttB	550	184	CCA→UCA	Pro→Ser	C	U	0.99
mttB	586	196	CGU→UGU	Arg→Cys	C	U	0.99
mttB	593	198	CCA→CUA	Pro→Leu	C	U	0.98
mttB	599	200	CCA→CUA	Pro→Leu	C	U	0.99
mttB	623	208	UCC→UUC	Ser→Phe	C	U	0.98
mttB	655	219	CCG→UCG	Pro→Ser	C	U	0.99
mttB	661	221	CUC→UUC	Leu→Phe	C	U	0.97
mttB	705	235	AUC→AUU	Ile→Ile	C	U	0.23
mttB	712	238	CGU→UGU	Arg→Cys	C	U	0.99
mttB	749	250	UCU→UUU	Ser→Phe	C	U	0.98
mttB	758	253	UCG→UUG	Ser→Leu	C	U	0.94
nad1	40	14	CUA→UUA	Leu→Leu	C	U	0.45
nad1	215	72	UCC→UUC	Ser→Phe	C	U	0.99
nad1	265	89	CGG→UGG	Arg→Trp	C	U	1
nad1	307	103	CCG→UUG	Pro→Leu	C	U	1
nad1	308	103	CCG→UUG	Pro→Leu	C	U	1
nad1	336	112	GCC→GCU	Ala→Ala	C	U	0.14
nad1	376	126	CGG→UGG	Arg→Trp	C	U	1
nad1	436	146	CCU→UCU	Pro→Ser	C	U	1
nad1	490	164	CCC→UCU	Pro→Ser	C	U	1
nad1	492	164	CCC→UCU	Pro→Ser	C	U	0.97
nad1	493	165	CGU→UGU	Arg→Cys	C	U	1
nad1	500	167	UCG→UUG	Ser→Leu	C	U	0.99
nad1	536	179	UCU→UUU	Ser→Phe	C	U	0.99
nad1	580	194	CGU→UGU	Arg→Cys	C	U	1
nad1	635	212	UCA→UUA	Ser→Leu	C	U	0.99
nad1	674	225	UCU→UUU	Ser→Phe	C	U	1
nad1	683	228	UCU→UUU	Ser→Phe	C	U	1
nad1	725	242	CCA→CUA	Pro→Leu	C	U	1
nad1	734	245	UCG→UUG	Ser→Leu	C	U	1
nad1	740	247	UCU→UUU	Ser→Phe	C	U	1
nad1	743	248	CCA→CUA	Pro→Leu	C	U	0.99
nad1	755	252	CCG→CUG	Pro→Leu	C	U	1
nad1	779	260	UCC→UUC	Ser→Phe	C	U	1
nad1	802	268	CGG→UGG	Arg→Trp	C	U	1
nad1	830	277	CCU→CUU	Pro→Leu	C	U	1
nad1	898	300	CGG→UGG	Arg→Trp	C	U	1
nad1	909	303	UUC→UUU	Phe→Phe	C	U	0.83
nad1	928	310	CGG→UGG	Arg→Trp	C	U	1
nad1	937	313	CCC→UCC	Pro→Ser	C	U	1
nad2	26	9	UCC→UUC	Ser→Phe	C	U	0.98
nad2	223	75	CUU→UUU	Leu→Phe	C	U	0.98
nad2	252	84	UUC→UUU	Phe→Phe	C	U	0.94
nad2	261	87	AUC→AUU	Ile→Ile	C	U	0.23
nad2	303	101	UUC→UUU	Phe→Phe	C	U	0.27
nad2	308	103	UCU→UUU	Ser→Phe	C	U	0.97
nad2	311	104	UCC→UUC	Ser→Phe	C	U	0.97
nad2	335	112	UCU→UUU	Ser→Phe	C	U	0.91
nad2	341	114	UCC→UUC	Ser→Phe	C	U	0.98
nad2	356	119	CCA→CUA	Pro→Leu	C	U	0.97
nad2	361	121	CCU→UCU	Pro→Ser	C	U	0.98
nad2	367	123	CGC→UGC	Arg→Cys	C	U	0.97
nad2	401	134	UCA→UUA	Ser→Leu	C	U	0.98
nad2	428	143	CCU→CUU	Pro→Leu	C	U	0.98
nad2	497	166	UCG→UUG	Ser→Leu	C	U	0.99
nad2	523	175	CCC→UCC	Pro→Ser	C	U	0.99
nad2	662	221	UCU→UUU	Ser→Phe	C	U	0.98
nad2	677	226	UCC→UUC	Ser→Phe	C	U	0.98
nad2	788	263	UCU→UUU	Ser→Phe	C	U	1
nad2	800	267	UCA→UUA	Ser→Leu	C	U	1
nad2	809	270	UCU→UUU	Ser→Phe	C	U	1
nad2	928	310	CAU→UAU	His→Tyr	C	U	0.99
nad2	958	320	CGU→UGU	Arg→Cys	C	U	1
nad2	962	321	ACU→AUU	Thr→Ile	C	U	1
nad2	1028	343	UCA→UUA	Ser→Leu	C	U	0.99
nad2	1058	353	UCA→UUA	Ser→Leu	C	U	0.99
nad2	1127	376	UCG→UUG	Ser→Leu	C	U	0.98
nad2	1200	400	UUC→UUU	Phe→Phe	C	U	0.11
nad2	1246	416	CCA→UCA	Pro→Ser	C	U	0.99
nad2	1276	426	CGU→UGU	Arg→Cys	C	U	0.99
nad2	1298	433	GCG→GUG	Ala→Val	C	U	0.97
nad2	1345	449	CCA→UCA	Pro→Ser	C	U	0.15
nad2	1400	467	UCA→UUA	Ser→Leu	C	U	0.96
nad2	1408	470	CCA→UUA	Pro→Leu	C	U	0.96
nad2	1409	470	CCA→UUA	Pro→Leu	C	U	0.96
nad2	1416	472	CCC→CCU	Pro→Pro	C	U	0.96
nad2	1457	486	UCA→UUA	Ser→Leu	C	U	0.95
nad3	5	2	UCA→UUA	Ser→Leu	C	U	0.93
nad3	39	13	AUC→AUU	Ile→Ile	C	U	0.92
nad3	44	15	CCG→CUG	Pro→Leu	C	U	0.91
nad3	61	21	CCA→UUA	Pro→Leu	C	U	0.8
nad3	62	21	CCA→UUA	Pro→Leu	C	U	0.82
nad3	98	33	UCG→UUG	Ser→Leu	C	U	0.11
nad3	208	70	CCU→UUU	Pro→Phe	C	U	0.96
nad3	209	70	CCU→UUU	Pro→Phe	C	U	0.98
nad3	215	72	CCG→CUG	Pro→Leu	C	U	0.98
nad3	230	77	UCC→UUC	Ser→Phe	C	U	0.98
nad3	247	83	CCU→UCU	Pro→Ser	C	U	0.97
nad3	266	89	CCG→CUG	Pro→Leu	C	U	0.96
nad3	275	92	UCU→UUU	Ser→Phe	C	U	0.97
nad3	317	106	UCU→UUU	Ser→Phe	C	U	0.98
nad3	344	115	UCG→UUG	Ser→Leu	C	U	0.99
nad3	349	117	CGG→UGG	Arg→Trp	C	U	0.98
nad4	29	10	UCU→UUU	Ser→Phe	C	U	0.98
nad4	44	15	CCU→CUU	Pro→Leu	C	U	0.99
nad4	74	25	ACU→AUU	Thr→Ile	C	U	0.97
nad4	77	26	CCU→CUU	Pro→Leu	C	U	0.99
nad4	84	28	UUC→UUU	Phe→Phe	C	U	0.86
nad4	107	36	CCG→CUG	Pro→Leu	C	U	0.99
nad4	154	52	CCC→UCC	Pro→Ser	C	U	0.99
nad4	158	53	CCU→CUU	Pro→Leu	C	U	0.99
nad4	166	56	CGG→UGG	Arg→Trp	C	U	0.99
nad4	197	66	UCU→UUU	Ser→Phe	C	U	0.99
nad4	261	87	GAC→GAU	Asp→Asp	C	U	0.26
nad4	317	106	UCA→UUA	Ser→Leu	C	U	1
nad4	362	121	ACA→AUA	Thr→Ile	C	U	1
nad4	368	123	UCU→UUU	Ser→Phe	C	U	1
nad4	376	126	CGU→UGU	Arg→Cys	C	U	1
nad4	403	135	CGC→UGC	Arg→Cys	C	U	1
nad4	416	139	CCU→CUU	Pro→Leu	C	U	1
nad4	436	146	CCC→UUC	Pro→Phe	C	U	1
nad4	437	146	CCC→UUC	Pro→Phe	C	U	1
nad4	449	150	CCA→CUA	Pro→Leu	C	U	1
nad4	608	203	UCA→UUA	Ser→Leu	C	U	1
nad4	659	220	UCU→UUU	Ser→Phe	C	U	1
nad4	710	237	UCA→UUA	Ser→Leu	C	U	1
nad4	767	256	CCU→CUU	Pro→Leu	C	U	0.99
nad4	836	279	UCC→UUC	Ser→Phe	C	U	1
nad4	857	286	UCA→UUA	Ser→Leu	C	U	0.84
nad4	887	296	UCG→UUG	Ser→Leu	C	U	0.99
nad4	934	312	CCA→UCA	Pro→Ser	C	U	0.99
nad4	977	326	CCG→CUG	Pro→Leu	C	U	1
nad4	1006	336	CCA→UUA	Pro→Leu	C	U	1
nad4	1007	336	CCA→UUA	Pro→Leu	C	U	1
nad4	1010	337	CCG→CUG	Pro→Leu	C	U	1
nad4	1016	339	UCA→UUA	Ser→Leu	C	U	1
nad4	1033	345	CCC→UCC	Pro→Ser	C	U	1
nad4	1109	370	UCA→UUA	Ser→Leu	C	U	1
nad4	1129	377	CUC→UUC	Leu→Phe	C	U	1
nad4	1132	378	CCU→UCU	Pro→Ser	C	U	1
nad4	1148	383	UCU→UUU	Ser→Phe	C	U	0.91
nad4	1151	384	UCC→UUU	Ser→Phe	C	U	1
nad4	1152	384	UCC→UUU	Ser→Phe	C	U	0.13
nad4	1172	391	UCA→UUA	Ser→Leu	C	U	1
nad4	1307	436	GCG→GUG	Ala→Val	C	U	1
nad4	1355	452	CCA→CUA	Pro→Leu	C	U	1
nad4	1373	458	UCC→UUC	Ser→Phe	C	U	1
nad4	1381	461	CUA→UUA	Leu→Leu	C	U	0.2
nad4	1405	469	CGG→UGG	Arg→Trp	C	U	1
nad4	1417	473	CAC→UAC	His→Tyr	C	U	0.99
nad4	1433	478	CCG→CUG	Pro→Leu	C	U	0.99
nad4	1438	480	CGC→UGC	Arg→Cys	C	U	0.99
nad4L	2	1	ACG→AUG	Thr→Met	C	U	0.95
nad4L	41	14	UCU→UUU	Ser→Phe	C	U	0.98
nad4L	55	19	CGG→UGG	Arg→Trp	C	U	0.95
nad4L	86	29	CCU→CUU	Pro→Leu	C	U	0.99
nad4L	95	32	UCA→UUA	Ser→Leu	C	U	0.99
nad4L	100	34	CCA→UCA	Pro→Ser	C	U	0.98
nad4L	110	37	UCA→UUA	Ser→Leu	C	U	0.98
nad4L	131	44	UCG→UUG	Ser→Leu	C	U	0.99
nad4L	158	53	UCG→UUG	Ser→Leu	C	U	0.99
nad4L	179	60	UCA→UUA	Ser→Leu	C	U	0.99
nad4L	188	63	UCA→UUA	Ser→Leu	C	U	0.99
nad4L	197	66	CCA→CUA	Pro→Leu	C	U	0.99
nad4L	281	94	UCU→UUU	Ser→Phe	C	U	1
nad5	155	52	CCG→CUG	Pro→Leu	C	U	0.99
nad5	242	81	CCG→CUG	Pro→Leu	C	U	0.99
nad5	272	91	UCC→UUC	Ser→Phe	C	U	0.99
nad5	358	120	CCU→UUU	Pro→Phe	C	U	0.99
nad5	359	120	CCU→UUU	Pro→Phe	C	U	0.99
nad5	374	125	CCA→CUA	Pro→Leu	C	U	0.99
nad5	398	133	UCU→UUU	Ser→Phe	C	U	0.99
nad5	539	180	CCU→CUU	Pro→Leu	C	U	0.99
nad5	548	183	UCG→UUG	Ser→Leu	C	U	0.86
nad5	598	200	CGU→UGU	Arg→Cys	C	U	1
nad5	608	203	GCC→GUC	Ala→Val	C	U	0.99
nad5	629	210	UCU→UUU	Ser→Phe	C	U	0.99
nad5	631	211	CGC→UGC	Arg→Cys	C	U	0.99
nad5	676	226	CUU→UUU	Leu→Phe	C	U	0.99
nad5	713	238	UCG→UUG	Ser→Leu	C	U	0.99
nad5	725	242	UCA→UUA	Ser→Leu	C	U	0.99
nad5	835	279	CCG→UCG	Pro→Ser	C	U	0.99
nad5	1184	395	CCA→CUA	Pro→Leu	C	U	0.99
nad5	1281	427	GUC→GUU	Val→Val	C	U	0.18
nad5	1490	497	CCC→CUC	Pro→Leu	C	U	0.99
nad5	1550	517	ACC→AUC	Thr→Ile	C	U	1
nad5	1568	523	CCG→CUG	Pro→Leu	C	U	0.99
nad5	1580	527	UCA→UUA	Ser→Leu	C	U	0.99
nad5	1589	530	UCU→UUU	Ser→Phe	C	U	1
nad5	1610	537	CCC→CUC	Pro→Leu	C	U	1
nad5	1665	555	CUC→CUU	Leu→Leu	C	U	0.24
nad5	1695	565	UUC→UUU	Phe→Phe	C	U	0.18
nad5	1895	632	UCA→UUA	Ser→Leu	C	U	1
nad5	1916	639	UCU→UUU	Ser→Phe	C	U	1
nad5	1918	640	CGU→UGU	Arg→Cys	C	U	1
nad5	1958	653	UCG→UUG	Ser→Leu	C	U	1
nad6	83	28	UCG→UUG	Ser→Leu	C	U	0.91
nad6	89	30	UCC→UUU	Ser→Phe	C	U	0.97
nad6	90	30	UCC→UUU	Ser→Phe	C	U	0.12
nad6	95	32	CCA→CUA	Pro→Leu	C	U	0.91
nad6	103	35	CGC→UGC	Arg→Cys	C	U	0.95
nad6	161	54	CCA→CUA	Pro→Leu	C	U	0.98
nad6	191	64	UCA→UUA	Ser→Leu	C	U	0.98
nad6	360	120	ACC→ACU	Thr→Thr	C	U	0.11
nad6	446	149	UCC→UUC	Ser→Phe	C	U	0.93
nad6	463	155	CCU→UCU	Pro→Ser	C	U	0.99
nad6	569	190	UCU→UUU	Ser→Phe	C	U	0.99
nad7	24	8	AUC→AUU	Ile→Ile	C	U	0.21
nad7	33	11	UUC→UUU	Phe→Phe	C	U	0.1
nad7	38	13	UCG→UUG	Ser→Leu	C	U	0.99
nad7	45	15	UUC→UUU	Phe→Phe	C	U	0.52
nad7	77	26	UCA→UUA	Ser→Leu	C	U	1
nad7	137	46	UCA→UUA	Ser→Leu	C	U	1
nad7	200	67	UCU→UUU	Ser→Phe	C	U	1
nad7	224	75	ACG→AUG	Thr→Met	C	U	1
nad7	231	77	GCC→GCU	Ala→Ala	C	U	0.11
nad7	244	82	CAU→UAU	His→Tyr	C	U	1
nad7	251	84	UCA→UUA	Ser→Leu	C	U	1
nad7	315	105	UUC→UUU	Phe→Phe	C	U	0.46
nad7	316	106	CGU→UGU	Arg→Cys	C	U	1
nad7	335	112	UCA→UUA	Ser→Leu	C	U	1
nad7	344	115	UCA→UUA	Ser→Leu	C	U	1
nad7	383	128	UCA→UUA	Ser→Leu	C	U	1
nad7	531	177	UCC→UCU	Ser→Ser	C	U	0.55
nad7	533	178	UCC→UUC	Ser→Phe	C	U	0.99
nad7	578	193	UCA→UUA	Ser→Leu	C	U	1
nad7	623	208	ACU→AUU	Thr→Ile	C	U	0.13
nad7	679	227	CCA→UCA	Pro→Ser	C	U	0.99
nad7	698	233	UCG→UUG	Ser→Leu	C	U	1
nad7	724	242	CAU→UAU	His→Tyr	C	U	1
nad7	739	247	CCU→UUU	Pro→Phe	C	U	1
nad7	740	247	CCU→UUU	Pro→Phe	C	U	1
nad7	769	257	CGC→UGC	Arg→Cys	C	U	1
nad7	836	279	CCU→CUU	Pro→Leu	C	U	0.99
nad7	926	309	UCA→UUA	Ser→Leu	C	U	0.95
nad7	944	315	CCU→CUU	Pro→Leu	C	U	1
nad7	963	321	UCC→UCU	Ser→Ser	C	U	0.26
nad7	973	325	CCU→UCU	Pro→Ser	C	U	1
nad7	1050	350	CCC→CCU	Pro→Pro	C	U	1
nad7	1057	353	CGU→UGU	Arg→Cys	C	U	1
nad7	1079	360	UCU→UUU	Ser→Phe	C	U	1
nad7	1088	363	UCA→UUA	Ser→Leu	C	U	0.99
nad7	1103	368	UCU→UUU	Ser→Phe	C	U	1
nad7	1124	375	CCA→CUA	Pro→Leu	C	U	0.99
nad7	1166	389	UCU→UUU	Ser→Phe	C	U	1
nad9	92	31	UCU→UUU	Ser→Phe	C	U	0.99
nad9	113	38	CCA→CUA	Pro→Leu	C	U	0.92
nad9	190	64	CAU→UAU	His→Tyr	C	U	0.97
nad9	298	100	CCG→UCG	Pro→Ser	C	U	1
nad9	328	110	CGG→UGG	Arg→Trp	C	U	0.99
nad9	368	123	UCC→UUC	Ser→Phe	C	U	0.99
nad9	398	133	UCA→UUA	Ser→Leu	C	U	1
nad9	439	147	CUU→UUU	Leu→Phe	C	U	0.99
nad9	539	180	UCU→UUU	Ser→Phe	C	U	0.99
rpl10	9	3	UUC→UUU	Phe→Phe	C	U	0.52
rpl10	83	28	UCA→UUA	Ser→Leu	C	U	0.91
rpl10	101	34	UCA→UUA	Ser→Leu	C	U	0.91
rpl10	133	45	CCA→UUA	Pro→Leu	C	U	0.96
rpl10	134	45	CCA→UUA	Pro→Leu	C	U	0.92
rpl10	180	60	ACC→ACU	Thr→Thr	C	U	0.87
rpl10	239	80	UCG→UUG	Ser→Leu	C	U	0.97
rpl10	307	103	CUG→UUG	Leu→Leu	C	U	0.12
rpl10	330	110	UAC→UAU	Tyr→Tyr	C	U	0.68
rpl10	403	135	CUU→UUU	Leu→Phe	C	U	0.98
rpl10	428	143	UCA→UUA	Ser→Leu	C	U	0.1
rpl16	232	78	CUC→UUC	Leu→Phe	C	U	0.25
rpl5	7	3	CCA→UCA	Pro→Ser	C	U	0.46
rpl5	13	5	CAU→UAU	His→Tyr	C	U	0.4
rpl5	35	12	UCA→UUA	Ser→Leu	C	U	0.99
rpl5	59	20	CCG→CUG	Pro→Leu	C	U	0.99
rpl5	64	22	CAC→UAC	His→Tyr	C	U	0.97
rpl5	92	31	UCG→UUG	Ser→Leu	C	U	0.96
rpl5	169	57	CCG→UCG	Pro→Ser	C	U	1
rpl5	172	58	CGC→UGC	Arg→Cys	C	U	0.99
rpl5	441	147	AUC→AUU	Ile→Ile	C	U	0.2
rpl5	509	170	CCA→CUA	Pro→Leu	C	U	0.97
rps12	71	24	UCG→UUG	Ser→Leu	C	U	0.99
rps12	84	28	CCC→CCU	Pro→Pro	C	U	0.71
rps12	100	34	CGC→UGC	Arg→Cys	C	U	0.98
rps12	104	35	CCG→CUG	Pro→Leu	C	U	0.98
rps12	112	38	CCA→UCA	Pro→Ser	C	U	0.98
rps12	146	49	CCA→CUA	Pro→Leu	C	U	0.98
rps12	196	66	CAC→UAC	His→Tyr	C	U	0.98
rps12	269	90	UCG→UUG	Ser→Leu	C	U	0.95
rps12	284	95	UCC→UUC	Ser→Phe	C	U	0.97
rps13	26	9	UCA→UUA	Ser→Leu	C	U	0.98
rps13	56	19	UCA→UUA	Ser→Leu	C	U	0.96
rps13	100	34	CGU→UGU	Arg→Cys	C	U	0.99
rps13	243	81	UUC→UUU	Phe→Phe	C	U	0.62
sdh4	29	10	UCG→UUG	Ser→Leu	C	U	0.13

## Sheet: Cuminum cyminum
Cuminum cyminum mitogenome RNA editing sites predicted by deepredmt
Region	Position	Amino position	Codon change	Amino change	Reference	Substitution	Accuracy
atp1	1039	346	CCC→UCC	P→S	C	U	1
atp1	1178	392	TCA→TUA	S→L	C	U	1
atp1	1216	405	CTT→UTT	L→F	C	U	0.998
atp1	1292	430	CCG→CUG	P→L	C	U	0.999
atp1	1490	496	CCA→CUA	P→L	C	U	1
atp4	56	18	CCA→CUA	P→L	C	U	1
atp4	59	19	TCT→TUT	S→F	C	U	0.997
atp4	71	23	TCA→TUA	S→L	C	U	0.995
atp4	89	29	TCA→TUA	S→L	C	U	1
atp4	118	39	CGT→UGT	R→C	C	U	0.974
atp4	215	71	TCG→TUG	S→L	C	U	0.998
atp4	227	75	CCC→CUC	P→L	C	U	0.999
atp4	248	82	CCT→CUT	P→L	C	U	1
atp4	250	83	CCG→UCG	P→S	C	U	0.903
atp4	251	83	CCG→CUG	P→L	C	U	1
atp4	395	131	TCA→TUA	S→L	C	U	0.999
atp4	407	135	CCA→CUA	P→L	C	U	0.993
atp4	416	138	ACT→AUT	T→I	C	U	0.987
atp6	37	12	CCC→UCC	P→S	C	U	0.998
atp6	116	38	TCA→TUA	S→L	C	U	0.999
atp6	167	55	CCG→CUG	P→L	C	U	0.999
atp6	173	57	CCG→CUG	P→L	C	U	0.998
atp6	224	74	TCC→TUC	S→F	C	U	0.995
atp6	229	76	CGC→UGC	R→C	C	U	0.999
atp6	236	78	TCG→TUG	S→L	C	U	0.983
atp6	254	84	TCG→TUG	S→L	C	U	0.991
atp6	262	87	CGT→UGT	R→C	C	U	0.998
atp6	269	89	CCA→CUA	P→L	C	U	0.998
atp6	401	133	TCA→TUA	S→L	C	U	1
atp6	460	153	CCT→UCT	P→S	C	U	0.999
atp6	463	154	CAT→UAT	H→Y	C	U	1
atp6	485	161	TCA→TUA	S→L	C	U	0.999
atp6	527	175	TCA→TUA	S→L	C	U	1
atp6	635	211	CCG→CUG	P→L	C	U	0.999
atp6	656	218	TCA→TUA	S→L	C	U	0.998
atp6	664	221	CAT→UAT	H→Y	C	U	0.993
atp6	671	223	TCT→TUT	S→F	C	U	0.994
atp6	680	226	TCA→TUA	S→L	C	U	1
atp6	707	235	ACA→AUA	T→I	C	U	0.999
atp6	718	239	CAA→UAA	Q→*	C	U	0.988
atp8	30	10	TTC→TTU	F→F	C	U	0.937
atp8	47	15	TCA→TUA	S→L	C	U	0.996
atp8	58	19	CTC→UTC	L→F	C	U	0.996
atp8	240	80	TCC→TCU	S→S	C	U	0.99
atp8	452	150	CCA→CUA	P→L	C	U	0.991
atp9	20	6	TCA→TUA	S→L	C	U	1
atp9	205	68	CTG→UTG	L→L	C	U	0.971
atp9	215	71	TCT→TUT	S→F	C	U	0.996
atp9	240	80	GTC→GTU	V→V	C	U	0.95
ccmB	43	14	CCC→UCC	P→S	C	U	0.995
ccmB	80	26	TCG→TUG	S→L	C	U	0.972
ccmB	87	29	ATC→ATU	I→I	C	U	0.987
ccmB	128	42	TCA→TUA	S→L	C	U	0.998
ccmB	137	45	TCC→TUC	S→F	C	U	0.988
ccmB	148	49	CCG→UCG	P→S	C	U	0.994
ccmB	149	49	CCG→CUG	P→L	C	U	0.993
ccmB	154	51	CGG→UGG	R→W	C	U	0.986
ccmB	160	53	CCT→UCT	P→S	C	U	0.958
ccmB	164	54	CCG→CUG	P→L	C	U	0.936
ccmB	172	57	CCT→UCT	P→S	C	U	0.99
ccmB	179	59	CCT→CUT	P→L	C	U
ccmC	76	25	CGG→UGG	R→W	C	U	0.998
ccmC	79	26	CTG→UTG	L→L	C	U	1
ccmC	103	34	CAT→UAT	H→Y	C	U	0.999
ccmC	115	38	CGG→UGG	R→W	C	U	0.991
ccmC	133	44	CTT→UTT	L→F	C	U	0.987
ccmC	161	53	CCG→CUG	P→L	C	U	1
ccmC	179	59	GCG→GUG	A→V	C	U	0.997
ccmC	184	61	CGG→UGG	R→W	C	U	0.983
ccmC	281	93	ACA→AUA	T→I	C	U	0.976
ccmC	299	99	TCT→TUT	S→F	C	U	0.993
ccmC	331	110	CGG→UGG	R→W	C	U	0.999
ccmC	358	119	CGG→UGG	R→W	C	U	0.998
ccmC	395	131	TCG→TUG	S→L	C	U	0.996
ccmC	399	133	TTC→TTU	F→F	C	U	0.994
ccmC	400	133	CTT→UTT	L→F	C	U	0.999
ccmC	421	140	CGT→UGT	R→C	C	U	0.999
ccmC	446	148	CCG→CUG	P→L	C	U	0.996
ccmC	451	150	CCT→UCT	P→S	C	U	0.997
ccmC	458	152	TCA→TUA	S→L	C	U	0.995
ccmC	463	154	CGT→UGT	R→C	C	U	0.991
ccmC	473	157	CCG→CUG	P→L	C	U	0.999
ccmC	497	165	TCT→TUT	S→F	C	U	0.999
ccmC	521	173	TCG→TUG	S→L	C	U	0.999
ccmC	548	182	TCT→TUT	S→F	C	U	0.994
ccmC	568	189	CCT→UCT	P→S	C	U	0.999
ccmC	575	191	CCC→CUC	P→L	C	U	0.998
ccmC	605	201	TCC→TUC	S→F	C	U	1
ccmC	608	202	CCC→CUC	P→L	C	U	0.999
ccmC	614	204	TCA→TUA	S→L	C	U	0.99
ccmC	619	206	CGT→UGT	R→C	C	U	0.981
ccmC	624	208	ATC→ATU	I→I	C	U	0.955
ccmC	650	216	CCT→CUT	P→L	C	U	0.99
ccmC	656	218	CCA→CUA	P→L	C	U	0.994
ccmFc	38	12	TCC→TUC	S→F	C	U	0.998
ccmFc	50	16	CCT→CUT	P→L	C	U	0.999
ccmFc	52	17	CGT→UGT	R→C	C	U	0.984
ccmFc	103	34	CCC→UCC	P→S	C	U	0.999
ccmFc	119	39	TCT→TUT	S→F	C	U	0.987
ccmFc	122	40	TCC→TUC	S→F	C	U	1
ccmFc	146	48	CCT→CUT	P→L	C	U	0.992
ccmFc	151	50	CCT→UCT	P→S	C	U	0.993
ccmFc	155	51	TCA→TUA	S→L	C	U	0.941
ccmFc	310	103	CGT→UGT	R→C	C	U	0.997
ccmFc	321	107	CCC→CCU	P→P	C	U	0.957
ccmFc	391	130	CGT→UGT	R→C	C	U	0.999
ccmFc	406	135	CGT→UGT	R→C	C	U	0.998
ccmFc	884	294	TCT→TUT	S→F	C	U	0.997
ccmFc	1145	381	CCA→CUA	P→L	C	U	0.997
ccmFc	1165	388	CCG→UCG	P→S	C	U	0.995
ccmFc	1166	388	CCG→CUG	P→L	C	U	0.998
ccmFc	1240	413	CGG→UGG	R→W	C	U	0.993
ccmFc	1274	424	TCG→TUG	S→L	C	U	0.985
ccmFc	1321	440	CGA→UGA	R→*	C	U	0.98
ccmFN	38	12	CCG→CUG	P→L	C	U	0.99
ccmFN	137	45	TCG→TUG	S→L	C	U	0.981
ccmFN	142	47	CGT→UGT	R→C	C	U	0.987
ccmFN	151	50	CCT→UCT	P→S	C	U	0.99
ccmFN	248	82	TCA→TUA	S→L	C	U	0.999
ccmFN	256	85	CGG→UGG	R→W	C	U	0.999
ccmFN	283	94	CTT→UTT	L→F	C	U	0.995
ccmFN	365	121	TCG→TUG	S→L	C	U	0.965
ccmFN	372	124	TTC→TTU	F→F	C	U	0.989
ccmFN	713	237	CCT→CUT	P→L	C	U	0.999
ccmFN	722	240	TCA→TUA	S→L	C	U	0.997
ccmFN	760	253	CGT→UGT	R→C	C	U	0.998
ccmFN	782	260	TCA→TUA	S→L	C	U	0.981
ccmFN	794	264	CCA→CUA	P→L	C	U	0.999
ccmFN	809	269	TCA→TUA	S→L	C	U	0.991
ccmFN	958	319	CGC→UGC	R→C	C	U	0.994
ccmFN	999	333	CTC→CTU	L→L	C	U	0.929
ccmFN	1276	425	CGG→UGG	R→W	C	U	0.992
ccmFN	1304	434	CCA→CUA	P→L	C	U	1
ccmFN	1321	440	CAT→UAT	H→Y	C	U	1
ccmFN	1336	445	CGG→UGG	R→W	C	U	0.999
ccmFN	1354	451	CGG→UGG	R→W	C	U	0.999
ccmFN	1387	462	CGG→UGG	R→W	C	U	1
ccmFN	1405	468	CGT→UGT	R→C	C	U	0.996
ccmFN	1448	482	TCG→TUG	S→L	C	U	0.999
ccmFN	1468	489	CTT→UTT	L→F	C	U	0.998
ccmFN	1472	490	CCA→CUA	P→L	C	U	0.995
ccmFN	1484	494	TCA→TUA	S→L	C	U	1
ccmFN	1493	497	TCT→TUT	S→F	C	U	0.998
ccmFN	1519	506	CCC→UCC	P→S	C	U	0.999
cox2	74	24	TCT→TUT	S→F	C	U	1
cox2	164	54	TCA→TUA	S→L	C	U	0.985
cox2	166	55	CGG→UGG	R→W	C	U	0.998
cox2	256	85	CGG→UGG	R→W	C	U	0.998
cox2	281	93	CCG→CUG	P→L	C	U	0.998
cox2	382	127	CGG→UGG	R→W	C	U	0.993
cox2	446	148	ACG→AUG	T→M	C	U	0.999
cox2	464	154	CCA→CUA	P→L	C	U	0.991
cox2	479	159	TCA→TUA	S→L	C	U	0.998
cox2	560	186	CCT→CUT	P→L	C	U	1
cox2	584	194	TCA→TUA	S→L	C	U	0.999
cox2	635	211	TCG→TUG	S→L	C	U	0.999
cox2	739	246	CGG→UGG	R→W	C	U	0.999
matR	193	64	CCA→UCA	P→S	C	U	0.994
matR	235	78	CCC→UCC	P→S	C	U	0.996
matR	236	78	CCC→CUC	P→L	C	U	0.956
matR	266	88	CCC→CUC	P→L	C	U	1
matR	326	108	CCA→CUA	P→L	C	U	0.983
matR	413	137	TCG→TUG	S→L	C	U	0.955
matR	1679	559	TCC→TUC	S→F	C	U	0.996
matR	1700	566	CCT→CUT	P→L	C	U	0.999
matR	1720	573	CGC→UGC	R→C	C	U	1
matR	1734	578	TAC→TAU	Y→Y	C	U	0.996
matR	1756	585	CAC→UAC	H→Y	C	U	0.995
matR	1787	595	CCG→CUG	P→L	C	U	0.997
matR	1826	608	CCA→CUA	P→L	C	U	0.998
matR	1844	614	TCA→TUA	S→L	C	U	0.997
mttB	34	11	CGT→UGT	R→C	C	U	0.999
mttB	46	15	CCG→UCG	P→S	C	U	0.998
mttB	62	20	TCT→TUT	S→F	C	U	0.996
mttB	65	21	CCA→CUA	P→L	C	U	0.985
mttB	112	37	CGT→UGT	R→C	C	U	0.998
mttB	122	40	TCA→TUA	S→L	C	U	1
mttB	134	44	TCC→TUC	S→F	C	U	1
mttB	136	45	CCG→UCG	P→S	C	U	0.999
mttB	157	52	CCA→UCA	P→S	C	U	1
mttB	196	65	CAT→UAT	H→Y	C	U	0.991
mttB	262	87	CTC→UTC	L→F	C	U	0.984
mttB	265	88	CAT→UAT	H→Y	C	U	0.983
mttB	278	92	TCT→TUT	S→F	C	U	0.933
mttB	280	93	CGC→UGC	R→C	C	U	0.999
mttB	307	102	CTT→UTT	L→F	C	U	0.919
mttB	310	103	CCC→UCC	P→S	C	U	0.998
mttB	313	104	CGG→UGG	R→W	C	U	0.968
mttB	341	113	CCA→CUA	P→L	C	U	0.999
mttB	393	131	CCC→CCU	P→P	C	U	0.998
mttB	406	135	CAT→UAT	H→Y	C	U	0.998
mttB	431	143	TCG→TUG	S→L	C	U	0.994
mttB	439	146	CCA→UCA	P→S	C	U	0.978
mttB	475	158	CGT→UGT	R→C	C	U	0.997
mttB	482	160	CCA→CUA	P→L	C	U	0.999
mttB	488	162	CCA→CUA	P→L	C	U	0.998
mttB	512	170	TCC→TUC	S→F	C	U	0.997
mttB	544	181	CCG→UCG	P→S	C	U	0.997
mttB	550	183	CTC→UTC	L→F	C	U	0.971
mttB	594	198	ATC→ATU	I→I	C	U	0.997
mttB	601	200	CGT→UGT	R→C	C	U	0.997
mttB	606	202	TTC→TTU	F→F	C	U	0.932
mttB	638	212	TCT→TUT	S→F	C	U	1
mttB	647	215	TCG→TUG	S→L	C	U	0.998
nad1	215	71	TCC→TUC	S→F	C	U	1
nad1	265	88	CGG→UGG	R→W	C	U	0.999
nad1	307	102	CCG→UCG	P→S	C	U	0.995
nad1	308	102	CCG→CUG	P→L	C	U	1
nad1	376	125	CGG→UGG	R→W	C	U	0.971
nad2	110	36	TCT→TUT	S→F	C	U	0.999
nad2	125	41	TCC→TUC	S→F	C	U	0.999
nad2	236	78	TCT→TUT	S→F	C	U	1
nad2	248	82	TCA→TUA	S→L	C	U	0.986
nad2	257	85	TCT→TUT	S→F	C	U	0.999
nad2	376	125	CAT→UAT	H→Y	C	U	0.995
nad2	406	135	CGT→UGT	R→C	C	U	0.998
nad2	410	136	ACT→AUT	T→I	C	U	0.985
nad2	476	158	TCA→TUA	S→L	C	U	0.999
nad2	506	168	TCA→TUA	S→L	C	U	0.997
nad2	575	191	TCG→TUG	S→L	C	U	0.999
nad2	694	231	CCA→UCA	P→S	C	U	0.999
nad2	724	241	CGT→UGT	R→C	C	U	1
nad2	746	248	GCG→GUG	A→V	C	U	1
nad2	848	282	TCA→TUA	S→L	C	U	0.964
nad2	856	285	CCA→UCA	P→S	C	U	0.976
nad2	857	285	CCA→CUA	P→L	C	U	0.991
nad2	864	288	CCC→CCU	P→P	C	U	0.976
nad2	905	301	TCA→TUA	S→L	C	U	0.998
nad3	5	1	TCA→TUA	S→L	C	U	0.966
nad3	44	14	CCG→CUG	P→L	C	U	1
nad3	61	20	CCA→UCA	P→S	C	U	0.937
nad3	62	20	CCA→CUA	P→L	C	U	0.992
nad3	208	69	CCT→UCT	P→S	C	U	0.998
nad3	209	69	CCT→CUT	P→L	C	U	0.996
nad3	215	71	CCG→CUG	P→L	C	U	0.992
nad3	230	76	TCC→TUC	S→F	C	U	0.999
nad3	247	82	CCT→UCT	P→S	C	U	0.996
nad3	266	88	CCG→CUG	P→L	C	U	1
nad3	275	91	TCT→TUT	S→F	C	U	0.998
nad3	317	105	TCT→TUT	S→F	C	U	1
nad3	344	114	TCG→TUG	S→L	C	U	0.999
nad3	349	116	CGG→UGG	R→W	C	U	0.999
nad4	29	9	TCT→TUT	S→F	C	U	1
nad4	44	14	CCT→CUT	P→L	C	U	0.999
nad4	74	24	ACT→AUT	T→I	C	U	0.997
nad4	77	25	CCT→CUT	P→L	C	U	0.999
nad4	107	35	CCG→CUG	P→L	C	U	0.989
nad4	154	51	CCT→UCT	P→S	C	U	1
nad4	158	52	CCT→CUT	P→L	C	U	0.997
nad4	166	55	CGG→UGG	R→W	C	U	0.996
nad4	197	65	TCT→TUT	S→F	C	U	0.998
nad4	317	105	TCA→TUA	S→L	C	U	0.983
nad4	362	120	ACA→AUA	T→I	C	U	0.999
nad4	368	122	TCT→TUT	S→F	C	U	0.996
nad4	376	125	CGT→UGT	R→C	C	U	0.995
nad4	403	134	CGC→UGC	R→C	C	U	0.999
nad4	416	138	CCT→CUT	P→L	C	U	0.997
nad4	436	145	CCC→UCC	P→S	C	U	0.999
nad4	437	145	CCC→CUC	P→L	C	U	0.987
nad4	449	149	CCA→CUA	P→L	C	U	0.995
nad4	608	202	TCA→TUA	S→L	C	U	0.999
nad4	659	219	TCT→TUT	S→F	C	U	0.999
nad4	710	236	TCA→TUA	S→L	C	U	0.998
nad4	836	278	TCC→TUC	S→F	C	U	0.99
nad4	857	285	TCA→TUA	S→L	C	U	1
nad4	887	295	TCG→TUG	S→L	C	U	1
nad4	934	311	CCA→UCA	P→S	C	U	0.999
nad4	1006	335	CCA→UCA	P→S	C	U	0.986
nad4	1007	335	CCA→CUA	P→L	C	U	0.992
nad4	1010	336	CCG→CUG	P→L	C	U	1
nad4	1016	338	TCA→TUA	S→L	C	U	1
nad4	1033	344	CCC→UCC	P→S	C	U	0.999
nad4	1109	369	TCA→TUA	S→L	C	U	0.998
nad4	1129	376	CTC→UTC	L→F	C	U	0.995
nad4	1132	377	CCT→UCT	P→S	C	U	1
nad4	1148	382	TCT→TUT	S→F	C	U	0.996
nad4	1151	383	TCC→TUC	S→F	C	U	0.992
nad4	1172	390	TCA→TUA	S→L	C	U	1
nad4	1355	451	CCA→CUA	P→L	C	U	0.995
nad4	1373	457	TCC→TUC	S→F	C	U	0.999
nad4	1405	468	CGG→UGG	R→W	C	U	0.997
nad4	1417	472	CAC→UAC	H→Y	C	U	0.998
nad4	1433	477	CCG→CUG	P→L	C	U	0.999
nad4	1438	479	CGC→UGC	R→C	C	U	0.991
nad4L	11	3	TCT→TUT	S→F	C	U	0.971
nad4L	17	5	TCA→TUA	S→L	C	U	0.998
nad4L	25	8	CGG→UGG	R→W	C	U	0.992
nad4L	56	18	CCT→CUT	P→L	C	U	0.967
nad4L	65	21	TCA→TUA	S→L	C	U	1
nad4L	70	23	CCA→UCA	P→S	C	U	0.999
nad4L	80	26	TCA→TUA	S→L	C	U	0.998
nad4L	101	33	TCG→TUG	S→L	C	U	1
nad4L	128	42	TCG→TUG	S→L	C	U	0.997
nad4L	149	49	TCA→TUA	S→L	C	U	1
nad4L	158	52	TCA→TUA	S→L	C	U	0.997
nad4L	166	55	CCA→UCA	P→S	C	U	0.905
nad4L	167	55	CCA→CUA	P→L	C	U	0.992
nad4L	251	83	TCT→TUT	S→F	C	U	0.999
nad5	155	51	CCG→CUG	P→L	C	U	1
nad5	242	80	CCG→CUG	P→L	C	U	0.999
nad5	272	90	TCC→TUC	S→F	C	U	0.999
nad5	358	119	CCT→UCT	P→S	C	U	0.994
nad5	359	119	CCT→CUT	P→L	C	U	0.999
nad5	374	124	CCA→CUA	P→L	C	U	0.996
nad5	398	132	TCT→TUT	S→F	C	U	1
nad5	539	179	CCT→CUT	P→L	C	U	0.999
nad5	548	182	TCG→TUG	S→L	C	U	0.999
nad5	598	199	CGT→UGT	R→C	C	U	0.999
nad5	608	202	GCC→GUC	A→V	C	U	0.993
nad5	629	209	TCT→TUT	S→F	C	U	0.999
nad5	631	210	CGC→UGC	R→C	C	U	0.996
nad5	676	225	CTT→UTT	L→F	C	U	1
nad5	713	237	TCG→TUG	S→L	C	U	0.999
nad5	725	241	TCA→TUA	S→L	C	U	1
nad5	835	278	CCG→UCG	P→S	C	U	1
nad5	1184	394	CCA→CUA	P→L	C	U	1
nad5	1469	489	CCC→CUC	P→L	C	U	0.999
nad5	1529	509	ACC→AUC	T→I	C	U	0.995
nad5	1547	515	CCG→CUG	P→L	C	U	1
nad5	1559	519	TCA→TUA	S→L	C	U	0.998
nad5	1568	522	TCT→TUT	S→F	C	U	0.985
nad5	1589	529	CCC→CUC	P→L	C	U	0.999
nad5	1874	624	TCA→TUA	S→L	C	U	0.998
nad5	1895	631	TCT→TUT	S→F	C	U	0.999
nad5	1897	632	CGT→UGT	R→C	C	U	0.999
nad5	1937	645	TCG→TUG	S→L	C	U	0.991
nad6	83	27	TCG→TUG	S→L	C	U	1
nad6	89	29	TCC→TUC	S→F	C	U	0.972
nad6	95	31	CCA→CUA	P→L	C	U	0.987
nad6	103	34	CGC→UGC	R→C	C	U	0.994
nad6	161	53	CCA→CUA	P→L	C	U	0.996
nad6	191	63	TCA→TUA	S→L	C	U	0.999
nad6	446	148	TCC→TUC	S→F	C	U	0.999
nad6	447	149	TCC→TCU	S→S	C	U	0.909
nad6	463	154	CCT→UCT	P→S	C	U	0.996
nad6	569	189	TCT→TUT	S→F	C	U	1
nad7	38	12	TCG→TUG	S→L	C	U	0.991
nad7	45	15	TTC→TTU	F→F	C	U	0.997
nad7	77	25	TCA→TUA	S→L	C	U	0.999
nad7	137	45	TCA→TUA	S→L	C	U	0.997
nad7	200	66	TCT→TUT	S→F	C	U	0.995
nad7	224	74	ACG→AUG	T→M	C	U	1
nad7	244	81	CAT→UAT	H→Y	C	U	0.999
nad7	251	83	TCA→TUA	S→L	C	U	0.993
nad7	316	105	CGT→UGT	R→C	C	U	0.997
nad7	335	111	TCA→TUA	S→L	C	U	0.999
nad7	344	114	TCA→TUA	S→L	C	U	0.999
nad7	383	127	TCA→TUA	S→L	C	U	1
nad7	533	177	TCC→TUC	S→F	C	U	0.998
nad7	578	192	TCA→TUA	S→L	C	U	1
nad7	679	226	CCA→UCA	P→S	C	U	0.987
nad7	698	232	TCG→TUG	S→L	C	U	1
nad7	724	241	CAT→UAT	H→Y	C	U	1
nad7	739	246	CCT→UCT	P→S	C	U	0.999
nad7	740	246	CCT→CUT	P→L	C	U	0.999
nad7	769	256	CGC→UGC	R→C	C	U	1
nad7	836	278	CCT→CUT	P→L	C	U	0.999
nad7	926	308	TCA→TUA	S→L	C	U	0.996
nad7	944	314	CCT→CUT	P→L	C	U	1
nad7	973	324	CCT→UCT	P→S	C	U	0.999
nad7	1050	350	CCC→CCU	P→P	C	U	0.966
nad7	1057	352	CGT→UGT	R→C	C	U	0.998
nad7	1079	359	TCT→TUT	S→F	C	U	0.999
nad7	1088	362	TCA→TUA	S→L	C	U	0.996
nad7	1103	367	TCT→TUT	S→F	C	U	0.999
nad7	1124	374	CCA→CUA	P→L	C	U	1
nad7	1137	379	GTC→GTU	V→V	C	U	0.941
nad7	1166	388	TCT→TUT	S→F	C	U	1
nad9	92	30	TCT→TUT	S→F	C	U	0.996
nad9	113	37	CCA→CUA	P→L	C	U	0.994
nad9	190	63	CAT→UAT	H→Y	C	U	1
nad9	298	99	CCG→UCG	P→S	C	U	0.995
nad9	328	109	CGG→UGG	R→W	C	U	1
nad9	368	122	TCC→TUC	S→F	C	U	1
nad9	398	132	TCA→TUA	S→L	C	U	0.998
nad9	439	146	CTT→UTT	L→F	C	U	0.998
nad9	539	179	TCT→TUT	S→F	C	U	0.997
rpl10	101	33	TCA→TUA	S→L	C	U	0.989
rpl10	134	44	CCA→CUA	P→L	C	U	0.994
rpl10	239	79	TCG→TUG	S→L	C	U	0.994
rpl2	181	60	CGT→UGT	R→C	C	U	0.929
rpl5	35	11	TCA→TUA	S→L	C	U	0.954
rpl5	59	19	CCG→CUG	P→L	C	U	0.982
rpl5	64	21	CAC→UAC	H→Y	C	U	0.937
rpl5	92	30	TCG→TUG	S→L	C	U	0.999
rpl5	169	56	CCG→UCG	P→S	C	U	0.955
rpl5	170	56	CCG→CUG	P→L	C	U	0.928
rpl5	172	57	CGC→UGC	R→C	C	U	0.999
rpl5	509	169	CCA→CUA	P→L	C	U	0.999
rps1	161	53	CCT→CUT	P→L	C	U	0.996
rps1	212	70	TCC→TUC	S→F	C	U	0.978
rps1	522	174	TTC→TTU	F→F	C	U	0.958
rps12	71	23	TCG→TUG	S→L	C	U	1
rps12	100	33	CGC→UGC	R→C	C	U	0.997
rps12	104	34	CCG→CUG	P→L	C	U	0.981
rps12	112	37	CCA→UCA	P→S	C	U	0.987
rps12	146	48	CCA→CUA	P→L	C	U	1
rps12	196	65	CAC→UAC	H→Y	C	U	0.999
rps12	269	89	TCG→TUG	S→L	C	U	0.997
rps12	284	94	TCC→TUC	S→F	C	U	1
rps13	26	8	TCA→TUA	S→L	C	U	1
rps13	56	18	TCA→TUA	S→L	C	U	0.988
rps13	100	33	CGT→UGT	R→C	C	U	0.993
rps13	243	81	TTC→TTU	F→F	C	U	0.994
rps14	323	107	CCC→CUC	P→L	C	U	0.917
rps4	50	16	CCA→CUA	P→L	C	U	0.99
rps4	62	20	TCG→TUG	S→L	C	U	0.997
rps4	74	24	CCG→CUG	P→L	C	U	0.999
rps4	91	30	CGT→UGT	R→C	C	U	0.984
rps4	119	39	CCG→CUG	P→L	C	U	0.999
rps4	218	72	GCG→GUG	A→V	C	U	0.974
rps4	266	88	TCA→TUA	S→L	C	U	0.956
rps4	701	233	TCG→TUG	S→L	C	U	0.988
rps4	712	237	CAT→UAT	H→Y	C	U	0.985
rps4	737	245	TCT→TUT	S→F	C	U	0.997
rps4	788	262	CCA→CUA	P→L	C	U	0.993
rps4	802	267	CGG→UGG	R→W	C	U	0.996

## Sheet: Daucus carota
Daucus carota mitogenome RNA editing sites predicted by deepredmt
Region	Position	Amino position	Codon change	Amino change	Reference	Substitution	Accuracy
atp1	1039	346	CCC→UCC	P→S	C	U	1
atp1	1178	392	TCA→TUA	S→L	C	U	1
atp1	1216	405	CTT→UTT	L→F	C	U	0.998
atp1	1292	430	CCG→CUG	P→L	C	U	0.999
atp1	1490	496	CCA→CUA	P→L	C	U	1
atp4	56	18	CCA→CUA	P→L	C	U	1
atp4	59	19	TCT→TUT	S→F	C	U	0.997
atp4	71	23	TCA→TUA	S→L	C	U	0.995
atp4	89	29	TCA→TUA	S→L	C	U	1
atp4	118	39	CGT→UGT	R→C	C	U	0.974
atp4	215	71	TCG→TUG	S→L	C	U	0.998
atp4	227	75	CCC→CUC	P→L	C	U	0.999
atp4	248	82	CCT→CUT	P→L	C	U	1
atp4	250	83	CCG→UCG	P→S	C	U	0.903
atp4	251	83	CCG→CUG	P→L	C	U	1
atp4	395	131	TCA→TUA	S→L	C	U	0.999
atp4	407	135	CCA→CUA	P→L	C	U	0.993
atp4	416	138	ACT→AUT	T→I	C	U	0.987
atp6	445	148	CCC→UCC	P→S	C	U	0.998
atp6	524	174	TCA→TUA	S→L	C	U	0.999
atp6	575	191	CCG→CUG	P→L	C	U	0.999
atp6	581	193	CCG→CUG	P→L	C	U	0.998
atp6	632	210	TCC→TUC	S→F	C	U	0.995
atp6	637	212	CGC→UGC	R→C	C	U	0.999
atp6	644	214	TCG→TUG	S→L	C	U	0.983
atp6	662	220	TCG→TUG	S→L	C	U	0.991
atp6	670	223	CGT→UGT	R→C	C	U	0.998
atp6	677	225	CCA→CUA	P→L	C	U	0.998
atp6	809	269	TCA→TUA	S→L	C	U	1
atp6	868	289	CCT→UCT	P→S	C	U	0.999
atp6	871	290	CAT→UAT	H→Y	C	U	1
atp6	893	297	TCA→TUA	S→L	C	U	0.999
atp6	935	311	TCA→TUA	S→L	C	U	1
atp6	1043	347	CCG→CUG	P→L	C	U	0.999
atp6	1064	354	TCA→TUA	S→L	C	U	0.998
atp6	1072	357	CAT→UAT	H→Y	C	U	0.993
atp6	1079	359	TCT→TUT	S→F	C	U	0.994
atp6	1088	362	TCA→TUA	S→L	C	U	1
atp6	1115	371	ACA→AUA	T→I	C	U	0.999
atp6	1126	375	CAA→UAA	Q→*	C	U	0.988
atp8	30	10	TTC→TTU	F→F	C	U	0.937
atp8	47	15	TCA→TUA	S→L	C	U	0.996
atp8	58	19	CTC→UTC	L→F	C	U	0.996
atp8	240	80	TCC→TCU	S→S	C	U	0.99
atp8	452	150	CCA→CUA	P→L	C	U	0.991
atp9	20	6	TCA→TUA	S→L	C	U	1
atp9	205	68	CTG→UTG	L→L	C	U	0.971
atp9	215	71	TCT→TUT	S→F	C	U	0.982
atp9	223	74	CAA→UAA	Q→*	C	U	0.944
ccmB	43	14	CCC→UCC	P→S	C	U	0.995
ccmB	80	26	TCG→TUG	S→L	C	U	0.972
ccmB	87	29	ATC→ATU	I→I	C	U	0.987
ccmB	128	42	TCA→TUA	S→L	C	U	0.998
ccmB	137	45	TCC→TUC	S→F	C	U	0.988
ccmB	148	49	CCG→UCG	P→S	C	U	0.994
ccmB	149	49	CCG→CUG	P→L	C	U	0.993
ccmB	154	51	CGG→UGG	R→W	C	U	0.986
ccmB	160	53	CCT→UCT	P→S	C	U	0.958
ccmB	164	54	CCG→CUG	P→L	C	U	0.936
ccmB	172	57	CCT→UCT	P→S	C	U	0.99
ccmB	179	59	CCT→CUT	P→L	C	U	0.933
ccmB	193	64	CCT→UCT	P→S	C	U	0.944
ccmB	194	64	CCT→CUT	P→L	C	U	0.994
ccmB	304	101	CGT→UGT	R→C	C	U	0.992
ccmB	338	112	CCG→CUG	P→L	C	U	0.997
ccmB	367	122	CGG→UGG	R→W	C	U	0.979
ccmB	379	126	CCA→UCA	P→S	C	U	0.919
ccmB	380	126	CCA→CUA	P→L	C	U	0.999
ccmB	424	141	CGT→UGT	R→C	C	U	0.994
ccmB	428	142	TCG→TUG	S→L	C	U	0.996
ccmB	475	158	CCA→UCA	P→S	C	U	0.998
ccmB	476	158	CCA→CUA	P→L	C	U	0.982
ccmB	485	161	TCA→TUA	S→L	C	U	0.975
ccmB	494	164	TCA→TUA	S→L	C	U	0.987
ccmB	502	167	CCA→UCA	P→S	C	U	0.972
ccmB	503	167	CCA→CUA	P→L	C	U	0.991
ccmB	512	170	TCT→TUT	S→F	C	U	0.981
ccmB	514	171	CGT→UGT	R→C	C	U	0.995
ccmB	551	183	TCA→TUA	S→L	C	U	0.997
ccmB	554	184	TCG→TUG	S→L	C	U	0.994
ccmB	566	188	TCC→TUC	S→F	C	U	0.981
ccmB	569	189	TCT→TUT	S→F	C	U	0.996
ccmB	572	190	CCG→CUG	P→L	C	U	0.995
ccmB	587	195	TCT→TUT	S→F	C	U	0.999
ccmC	76	25	CGG→UGG	R→W	C	U	1
ccmC	103	34	CAT→UAT	H→Y	C	U	0.999
ccmC	115	38	CGG→UGG	R→W	C	U	0.991
ccmC	133	44	CTT→UTT	L→F	C	U	0.987
ccmC	161	53	CCG→CUG	P→L	C	U	1
ccmC	179	59	GCG→GUG	A→V	C	U	0.997
ccmC	184	61	CGG→UGG	R→W	C	U	0.983
ccmC	281	93	ACA→AUA	T→I	C	U	0.976
ccmC	299	99	TCT→TUT	S→F	C	U	0.993
ccmC	331	110	CGG→UGG	R→W	C	U	0.999
ccmC	358	119	CGG→UGG	R→W	C	U	0.998
ccmC	395	131	TCG→TUG	S→L	C	U	0.996
ccmC	399	133	TTC→TTU	F→F	C	U	0.994
ccmC	400	133	CTT→UTT	L→F	C	U	0.999
ccmC	421	140	CGT→UGT	R→C	C	U	0.999
ccmC	446	148	CCG→CUG	P→L	C	U	0.996
ccmC	451	150	CCT→UCT	P→S	C	U	0.997
ccmC	458	152	TCA→TUA	S→L	C	U	0.995
ccmC	463	154	CGT→UGT	R→C	C	U	0.991
ccmC	473	157	CCG→CUG	P→L	C	U	0.999
ccmC	497	165	TCT→TUT	S→F	C	U	0.999
ccmC	521	173	TCG→TUG	S→L	C	U	0.999
ccmC	548	182	TCT→TUT	S→F	C	U	0.994
ccmC	568	189	CCT→UCT	P→S	C	U	0.999
ccmC	575	191	CCC→CUC	P→L	C	U	0.998
ccmC	605	201	TCC→TUC	S→F	C	U	1
ccmC	608	202	CCC→CUC	P→L	C	U	0.999
ccmC	614	204	TCA→TUA	S→L	C	U	0.99
ccmC	619	206	CGT→UGT	R→C	C	U	0.981
ccmC	624	208	ATC→ATU	I→I	C	U	0.955
ccmC	650	216	CCT→CUT	P→L	C	U	0.99
ccmC	656	218	CCA→CUA	P→L	C	U	0.994
ccmFc	38	12	TCC→TUC	S→F	C	U	0.998
ccmFc	50	16	CCT→CUT	P→L	C	U	0.999
ccmFc	52	17	CGT→UGT	R→C	C	U	0.984
ccmFc	103	34	CCC→UCC	P→S	C	U	0.999
ccmFc	119	39	TCT→TUT	S→F	C	U	0.987
ccmFc	122	40	TCC→TUC	S→F	C	U	1
ccmFc	146	48	CCT→CUT	P→L	C	U	0.992
ccmFc	151	50	CCT→UCT	P→S	C	U	0.993
ccmFc	155	51	TCA→TUA	S→L	C	U	0.941
ccmFc	310	103	CGT→UGT	R→C	C	U	0.994
ccmFc	391	130	CGT→UGT	R→C	C	U	0.999
ccmFc	406	135	CGT→UGT	R→C	C	U	0.998
ccmFc	884	294	TCT→TUT	S→F	C	U	0.997
ccmFc	1145	381	CCA→CUA	P→L	C	U	0.997
ccmFc	1165	388	CCG→UCG	P→S	C	U	0.995
ccmFc	1166	388	CCG→CUG	P→L	C	U	0.998
ccmFc	1240	413	CGG→UGG	R→W	C	U	0.993
ccmFc	1274	424	TCG→TUG	S→L	C	U	0.985
ccmFc	1321	440	CGA→UGA	R→*	C	U	0.995
ccmFn	38	12	CCG→CUG	P→L	C	U	0.99
ccmFn	137	45	TCG→TUG	S→L	C	U	0.981
ccmFn	142	47	CGT→UGT	R→C	C	U	0.987
ccmFn	151	50	CCT→UCT	P→S	C	U	0.99
ccmFn	248	82	TCA→TUA	S→L	C	U	0.999
ccmFn	256	85	CGG→UGG	R→W	C	U	0.999
ccmFn	283	94	CTT→UTT	L→F	C	U	0.995
ccmFn	365	121	TCG→TUG	S→L	C	U	0.959
ccmFn	372	124	TTC→TTU	F→F	C	U	0.981
ccmFn	713	237	CCT→CUT	P→L	C	U	0.999
ccmFn	722	240	TCA→TUA	S→L	C	U	0.997
ccmFn	760	253	CGT→UGT	R→C	C	U	0.998
ccmFn	782	260	TCA→TUA	S→L	C	U	0.981
ccmFn	794	264	CCA→CUA	P→L	C	U	0.999
ccmFn	809	269	TCA→TUA	S→L	C	U	0.991
ccmFn	958	319	CGC→UGC	R→C	C	U	0.994
ccmFn	999	333	CTC→CTU	L→L	C	U	0.921
ccmFn	1276	425	CGG→UGG	R→W	C	U	0.992
ccmFn	1304	434	CCA→CUA	P→L	C	U	1
ccmFn	1321	440	CAT→UAT	H→Y	C	U	1
ccmFn	1336	445	CGG→UGG	R→W	C	U	0.999
ccmFn	1354	451	CGG→UGG	R→W	C	U	0.999
ccmFn	1387	462	CGG→UGG	R→W	C	U	1
ccmFn	1405	468	CGT→UGT	R→C	C	U	0.996
ccmFn	1448	482	TCG→TUG	S→L	C	U	0.999
ccmFn	1468	489	CTT→UTT	L→F	C	U	0.998
ccmFn	1472	490	CCA→CUA	P→L	C	U	0.995
ccmFn	1484	494	TCA→TUA	S→L	C	U	1
ccmFn	1493	497	TCT→TUT	S→F	C	U	0.998
ccmFn	1519	506	CCC→UCC	P→S	C	U	0.999
cob	118	39	CCG→UCG	P→S	C	U	0.999
cob	286	95	CTC→UTC	L→F	C	U	1
cob	298	99	CAC→UAC	H→Y	C	U	0.996
cob	358	119	CGG→UGG	R→W	C	U	0.997
cob	419	139	CCA→CUA	P→L	C	U	1
cob	680	226	TCT→TUT	S→F	C	U	0.987
cob	737	245	TCT→TUT	S→F	C	U	0.972
cob	808	269	CCC→UCC	P→S	C	U	1
cob	853	284	CAT→UAT	H→Y	C	U	0.999
cob	908	302	CCA→CUA	P→L	C	U	0.998
cob	1018	339	CGC→UGC	R→C	C	U	0.947
cob	1087	362	CCT→UCT	P→S	C	U	0.987
cob	1127	375	CCG→CUG	P→L	C	U	0.954
cox1	155	51	TCT→TUT	S→F	C	U	0.998
cox1	167	55	TCT→TUT	S→F	C	U	1
cox1	265	88	CCA→UCA	P→S	C	U	0.998
cox1	356	118	TCA→TUA	S→L	C	U	0.993
cox1	365	121	TCT→TUT	S→F	C	U	0.999
cox1	371	123	CCT→CUT	P→L	C	U	1
cox1	428	142	TCC→TUC	S→F	C	U	1
cox1	464	154	TCA→TUA	S→L	C	U	1
cox1	503	167	CCA→CUA	P→L	C	U	0.999
cox1	581	193	TCT→TUT	S→F	C	U	0.999
cox1	628	209	CGG→UGG	R→W	C	U	0.987
cox1	659	219	CCC→CUC	P→L	C	U	0.998
cox1	674	224	TCC→TUC	S→F	C	U	0.996
cox1	950	316	TCC→TUC	S→F	C	U	0.999
cox1	992	330	CCG→CUG	P→L	C	U	1
cox1	1099	366	CAC→UAC	H→Y	C	U	1
cox1	1187	395	CCG→CUG	P→L	C	U	0.998
cox1	1318	439	CGT→UGT	R→C	C	U	1
cox1	1346	448	TCA→TUA	S→L	C	U	0.997
cox1	1359	453	AAC→AAU	N→N	C	U	0.982
cox1	1402	467	CCA→UCA	P→S	C	U	0.979
cox1	1412	470	CCG→CUG	P→L	C	U	0.982
cox2	74	24	TCT→TUT	S→F	C	U	0.993
cox2	164	54	TCA→TUA	S→L	C	U	0.985
cox2	166	55	CGG→UGG	R→W	C	U	0.998
cox2	200	66	TCT→TUT	S→F	C	U	0.902
cox2	256	85	CGG→UGG	R→W	C	U	0.998
cox2	281	93	CCG→CUG	P→L	C	U	0.998
cox2	382	127	CGG→UGG	R→W	C	U	0.993
cox2	446	148	ACG→AUG	T→M	C	U	0.999
cox2	464	154	CCA→CUA	P→L	C	U	0.991
cox2	479	159	TCA→TUA	S→L	C	U	0.998
cox2	560	186	CCT→CUT	P→L	C	U	1
cox2	584	194	TCA→TUA	S→L	C	U	0.999
cox2	635	211	TCG→TUG	S→L	C	U	0.999
cox2	739	246	CGG→UGG	R→W	C	U	0.999
cox3	112	37	CCA→UCA	P→S	C	U	1
cox3	245	81	CCT→CUT	P→L	C	U	1
cox3	289	96	CTT→UTT	L→F	C	U	1
cox3	298	99	CTT→UTT	L→F	C	U	0.998
cox3	311	103	TCT→TUT	S→F	C	U	0.989
cox3	314	104	TCT→TUT	S→F	C	U	0.998
cox3	388	129	CGG→UGG	R→W	C	U	0.999
cox3	422	140	CCT→CUT	P→L	C	U	0.996
cox3	512	170	TCA→TUA	S→L	C	U	1
cox3	566	188	TCC→TUC	S→F	C	U	1
cox3	754	251	CGG→UGG	R→W	C	U	1
cox3	764	254	CCA→CUA	P→L	C	U	1
matR	193	64	CCA→UCA	P→S	C	U	0.994
matR	235	78	CCC→UCC	P→S	C	U	0.996
matR	236	78	CCC→CUC	P→L	C	U	0.956
matR	266	88	CCC→CUC	P→L	C	U	1
matR	326	108	CCA→CUA	P→L	C	U	0.983
matR	413	137	TCG→TUG	S→L	C	U	0.955
matR	1679	559	TCC→TUC	S→F	C	U	0.996
matR	1700	566	CCT→CUT	P→L	C	U	0.999
matR	1720	573	CGC→UGC	R→C	C	U	1
matR	1734	578	TAC→TAU	Y→Y	C	U	0.996
matR	1756	585	CAC→UAC	H→Y	C	U	0.995
matR	1787	595	CCG→CUG	P→L	C	U	0.997
matR	1826	608	CCA→CUA	P→L	C	U	0.998
matR	1844	614	TCA→TUA	S→L	C	U	0.997
mttB	34	11	CGT→UGT	R→C	C	U	0.999
mttB	46	15	CCG→UCG	P→S	C	U	0.998
mttB	62	20	TCT→TUT	S→F	C	U	0.996
mttB	65	21	CCA→CUA	P→L	C	U	0.985
mttB	112	37	CGT→UGT	R→C	C	U	0.998
mttB	122	40	TCA→TUA	S→L	C	U	1
mttB	134	44	TCC→TUC	S→F	C	U	1
mttB	136	45	CCG→UCG	P→S	C	U	0.999
mttB	157	52	CCA→UCA	P→S	C	U	1
mttB	196	65	CAT→UAT	H→Y	C	U	0.991
mttB	262	87	CTC→UTC	L→F	C	U	0.984
mttB	265	88	CAT→UAT	H→Y	C	U	0.983
mttB	278	92	TCT→TUT	S→F	C	U	0.933
mttB	280	93	CGC→UGC	R→C	C	U	0.999
mttB	307	102	CTT→UTT	L→F	C	U	0.919
mttB	310	103	CCC→UCC	P→S	C	U	0.998
mttB	313	104	CGG→UGG	R→W	C	U	0.968
mttB	341	113	CCA→CUA	P→L	C	U	0.999
mttB	393	131	CCC→CCU	P→P	C	U	0.998
mttB	406	135	CAT→UAT	H→Y	C	U	0.998
mttB	431	143	TCG→TUG	S→L	C	U	0.994
mttB	439	146	CCA→UCA	P→S	C	U	0.978
mttB	475	158	CGT→UGT	R→C	C	U	0.997
mttB	482	160	CCA→CUA	P→L	C	U	0.999
mttB	488	162	CCA→CUA	P→L	C	U	0.998
mttB	512	170	TCC→TUC	S→F	C	U	0.997
mttB	544	181	CCG→UCG	P→S	C	U	0.997
mttB	550	183	CTC→UTC	L→F	C	U	0.971
mttB	594	198	ATC→ATU	I→I	C	U	0.997
mttB	601	200	CGT→UGT	R→C	C	U	0.997
mttB	606	202	TTC→TTU	F→F	C	U	0.932
mttB	638	212	TCT→TUT	S→F	C	U	1
mttB	647	215	TCG→TUG	S→L	C	U	0.998
nad1	215	71	TCC→TUC	S→F	C	U	1
nad1	265	88	CGG→UGG	R→W	C	U	0.999
nad1	307	102	CCG→UCG	P→S	C	U	0.995
nad1	308	102	CCG→CUG	P→L	C	U	1
nad1	376	125	CGG→UGG	R→W	C	U	0.999
nad1	436	145	CCT→UCT	P→S	C	U	0.998
nad1	490	163	CCC→UCC	P→S	C	U	0.997
nad1	492	164	CCC→CCU	P→P	C	U	0.989
nad1	493	164	CGT→UGT	R→C	C	U	0.995
nad1	500	166	TCG→TUG	S→L	C	U	1
nad1	536	178	TCT→TUT	S→F	C	U	0.998
nad1	580	193	CGT→UGT	R→C	C	U	0.992
nad1	635	211	TCA→TUA	S→L	C	U	0.999
nad1	674	224	TCT→TUT	S→F	C	U	1
nad1	683	227	TCT→TUT	S→F	C	U	0.999
nad1	734	244	TCG→TUG	S→L	C	U	0.985
nad1	740	246	TCT→TUT	S→F	C	U	0.997
nad1	743	247	CCA→CUA	P→L	C	U	0.987
nad1	755	251	CCG→CUG	P→L	C	U	0.995
nad1	779	259	TCC→TUC	S→F	C	U	0.998
nad1	802	267	CGG→UGG	R→W	C	U	1
nad1	830	276	CCT→CUT	P→L	C	U	0.996
nad1	898	299	CGG→UGG	R→W	C	U	0.999
nad1	928	309	CGG→UGG	R→W	C	U	0.999
nad1	937	312	CCC→UCC	P→S	C	U	0.988
nad2	26	8	TCC→TUC	S→F	C	U	0.996
nad2	223	74	CTT→UTT	L→F	C	U	0.997
nad2	308	102	TCT→TUT	S→F	C	U	0.997
nad2	311	103	TCC→TUC	S→F	C	U	0.999
nad2	335	111	TCT→TUT	S→F	C	U	1
nad2	341	113	TCC→TUC	S→F	C	U	0.999
nad2	356	118	CCA→CUA	P→L	C	U	0.996
nad2	361	120	CCT→UCT	P→S	C	U	0.999
nad2	367	122	CGC→UGC	R→C	C	U	0.989
nad2	401	133	TCA→TUA	S→L	C	U	0.998
nad2	428	142	CCT→CUT	P→L	C	U	0.999
nad2	497	165	TCG→TUG	S→L	C	U	0.992
nad2	662	220	TCT→TUT	S→F	C	U	0.999
nad2	677	225	TCC→TUC	S→F	C	U	0.997
nad2	788	262	TCT→TUT	S→F	C	U	0.998
nad2	800	266	TCA→TUA	S→L	C	U	0.915
nad2	809	269	TCT→TUT	S→F	C	U	0.999
nad2	928	309	CAT→UAT	H→Y	C	U	0.995
nad2	958	319	CGT→UGT	R→C	C	U	0.998
nad2	962	320	ACT→AUT	T→I	C	U	0.985
nad2	1028	342	TCA→TUA	S→L	C	U	0.999
nad2	1058	352	TCA→TUA	S→L	C	U	0.997
nad2	1127	375	TCG→TUG	S→L	C	U	0.999
nad2	1246	415	CCA→UCA	P→S	C	U	0.999
nad2	1276	425	CGT→UGT	R→C	C	U	1
nad2	1298	432	GCG→GUG	A→V	C	U	1
nad2	1400	466	TCA→TUA	S→L	C	U	0.964
nad2	1408	469	CCA→UCA	P→S	C	U	0.976
nad2	1409	469	CCA→CUA	P→L	C	U	0.991
nad2	1416	472	CCC→CCU	P→P	C	U	0.976
nad2	1457	485	TCA→TUA	S→L	C	U	0.998
nad3	5	1	TCA→TUA	S→L	C	U	0.966
nad3	44	14	CCG→CUG	P→L	C	U	1
nad3	61	20	CCA→UCA	P→S	C	U	0.937
nad3	62	20	CCA→CUA	P→L	C	U	0.992
nad3	208	69	CCT→UCT	P→S	C	U	0.998
nad3	209	69	CCT→CUT	P→L	C	U	0.996
nad3	215	71	CCG→CUG	P→L	C	U	0.992
nad3	230	76	TCC→TUC	S→F	C	U	0.999
nad3	247	82	CCT→UCT	P→S	C	U	0.996
nad3	266	88	CCG→CUG	P→L	C	U	1
nad3	275	91	TCT→TUT	S→F	C	U	0.998
nad3	317	105	TCT→TUT	S→F	C	U	1
nad3	344	114	TCG→TUG	S→L	C	U	0.999
nad3	349	116	CGG→UGG	R→W	C	U	0.999
nad4	29	9	TCT→TUT	S→F	C	U	1
nad4	44	14	CCT→CUT	P→L	C	U	0.999
nad4	74	24	ACT→AUT	T→I	C	U	0.997
nad4	77	25	CCT→CUT	P→L	C	U	0.999
nad4	107	35	CCG→CUG	P→L	C	U	0.989
nad4	154	51	CCC→UCC	P→S	C	U	1
nad4	158	52	CCT→CUT	P→L	C	U	0.997
nad4	166	55	CGG→UGG	R→W	C	U	0.992
nad4	197	65	TCT→TUT	S→F	C	U	0.998
nad4	317	105	TCA→TUA	S→L	C	U	0.983
nad4	362	120	ACA→AUA	T→I	C	U	0.999
nad4	368	122	TCT→TUT	S→F	C	U	0.996
nad4	376	125	CGT→UGT	R→C	C	U	0.995
nad4	403	134	CGC→UGC	R→C	C	U	0.999
nad4	416	138	CCT→CUT	P→L	C	U	0.997
nad4	436	145	CCC→UCC	P→S	C	U	0.999
nad4	437	145	CCC→CUC	P→L	C	U	0.987
nad4	449	149	CCA→CUA	P→L	C	U	0.995
nad4	608	202	TCA→TUA	S→L	C	U	0.999
nad4	659	219	TCT→TUT	S→F	C	U	0.999
nad4	710	236	TCA→TUA	S→L	C	U	1
nad4	767	255	CCT→CUT	P→L	C	U	0.999
nad4	836	278	TCC→TUC	S→F	C	U	0.99
nad4	857	285	TCA→TUA	S→L	C	U	1
nad4	887	295	TCG→TUG	S→L	C	U	1
nad4	934	311	CCA→UCA	P→S	C	U	0.999
nad4	1006	335	CCA→UCA	P→S	C	U	0.986
nad4	1007	335	CCA→CUA	P→L	C	U	0.992
nad4	1010	336	CCG→CUG	P→L	C	U	1
nad4	1016	338	TCA→TUA	S→L	C	U	1
nad4	1033	344	CCC→UCC	P→S	C	U	0.999
nad4	1101	367	TAC→TAU	Y→Y	C	U	0.906
nad4	1109	369	TCA→TUA	S→L	C	U	0.999
nad4	1129	376	CTC→UTC	L→F	C	U	0.995
nad4	1132	377	CCT→UCT	P→S	C	U	1
nad4	1148	382	TCT→TUT	S→F	C	U	0.996
nad4	1151	383	TCC→TUC	S→F	C	U	0.992
nad4	1172	390	TCA→TUA	S→L	C	U	1
nad4	1307	435	GCG→GUG	A→V	C	U	0.992
nad4	1355	451	CCA→CUA	P→L	C	U	0.995
nad4	1373	457	TCC→TUC	S→F	C	U	0.999
nad4	1405	468	CGG→UGG	R→W	C	U	0.997
nad4	1417	472	CAC→UAC	H→Y	C	U	0.998
nad4	1433	477	CCG→CUG	P→L	C	U	0.999
nad4	1438	479	CGC→UGC	R→C	C	U	0.991
nad4L	11	3	TCT→TUT	S→F	C	U	0.971
nad4L	17	5	TCA→TUA	S→L	C	U	0.998
nad4L	25	8	CGG→UGG	R→W	C	U	0.992
nad4L	56	18	CCT→CUT	P→L	C	U	0.967
nad4L	65	21	TCA→TUA	S→L	C	U	1
nad4L	70	23	CCA→UCA	P→S	C	U	0.999
nad4L	80	26	TCA→TUA	S→L	C	U	0.998
nad4L	101	33	TCG→TUG	S→L	C	U	1
nad4L	128	42	TCG→TUG	S→L	C	U	0.997
nad4L	149	49	TCA→TUA	S→L	C	U	1
nad4L	158	52	TCA→TUA	S→L	C	U	0.997
nad4L	166	55	CCA→UCA	P→S	C	U	0.905
nad4L	167	55	CCA→CUA	P→L	C	U	0.992
nad4L	251	83	TCT→TUT	S→F	C	U	0.999
nad5	155	51	CCG→CUG	P→L	C	U	1
nad5	242	80	CCG→CUG	P→L	C	U	0.999
nad5	272	90	TCC→TUC	S→F	C	U	0.999
nad5	358	119	CCT→UCT	P→S	C	U	0.994
nad5	359	119	CCT→CUT	P→L	C	U	0.999
nad5	374	124	CCA→CUA	P→L	C	U	0.996
nad5	398	132	TCT→TUT	S→F	C	U	1
nad5	539	179	CCT→CUT	P→L	C	U	0.999
nad5	548	182	TCG→TUG	S→L	C	U	0.999
nad5	598	199	CGT→UGT	R→C	C	U	0.999
nad5	608	202	GCC→GUC	A→V	C	U	0.993
nad5	629	209	TCT→TUT	S→F	C	U	0.999
nad5	631	210	CGC→UGC	R→C	C	U	0.996
nad5	676	225	CTT→UTT	L→F	C	U	1
nad5	713	237	TCG→TUG	S→L	C	U	0.999
nad5	725	241	TCA→TUA	S→L	C	U	1
nad5	835	278	CCG→UCG	P→S	C	U	1
nad5	1184	394	CCA→CUA	P→L	C	U	0.996
nad5	1490	496	CCC→CUC	P→L	C	U	0.999
nad5	1550	516	ACC→AUC	T→I	C	U	0.995
nad5	1568	522	CCG→CUG	P→L	C	U	1
nad5	1580	526	TCA→TUA	S→L	C	U	0.998
nad5	1589	529	TCT→TUT	S→F	C	U	0.985
nad5	1610	536	CCC→CUC	P→L	C	U	0.999
nad5	1895	631	TCA→TUA	S→L	C	U	0.998
nad5	1916	638	TCT→TUT	S→F	C	U	0.999
nad5	1918	639	CGT→UGT	R→C	C	U	0.999
nad5	1958	652	TCG→TUG	S→L	C	U	0.991
nad6	83	27	TCG→TUG	S→L	C	U	1
nad6	89	29	TCC→TUC	S→F	C	U	0.972
nad6	95	31	CCA→CUA	P→L	C	U	0.987
nad6	103	34	CGC→UGC	R→C	C	U	0.994
nad6	161	53	CCA→CUA	P→L	C	U	0.996
nad6	191	63	TCA→TUA	S→L	C	U	0.999
nad6	446	148	TCC→TUC	S→F	C	U	0.999
nad6	447	149	TCC→TCU	S→S	C	U	0.909
nad6	463	154	CCT→UCT	P→S	C	U	0.996
nad6	569	189	TCT→TUT	S→F	C	U	1
nad7	38	12	TCG→TUG	S→L	C	U	0.991
nad7	45	15	TTC→TTU	F→F	C	U	0.997
nad7	77	25	TCA→TUA	S→L	C	U	0.999
nad7	137	45	TCA→TUA	S→L	C	U	0.997
nad7	200	66	TCT→TUT	S→F	C	U	0.995
nad7	224	74	ACG→AUG	T→M	C	U	1
nad7	244	81	CAT→UAT	H→Y	C	U	0.999
nad7	251	83	TCA→TUA	S→L	C	U	0.993
nad7	316	105	CGT→UGT	R→C	C	U	0.997
nad7	335	111	TCA→TUA	S→L	C	U	0.999
nad7	344	114	TCA→TUA	S→L	C	U	0.999
nad7	383	127	TCA→TUA	S→L	C	U	1
nad7	533	177	TCC→TUC	S→F	C	U	0.992
nad7	578	192	TCA→TUA	S→L	C	U	1
nad7	679	226	CCA→UCA	P→S	C	U	0.987
nad7	698	232	TCG→TUG	S→L	C	U	1
nad7	724	241	CAT→UAT	H→Y	C	U	1
nad7	739	246	CCT→UCT	P→S	C	U	0.999
nad7	740	246	CCT→CUT	P→L	C	U	0.999
nad7	769	256	CGC→UGC	R→C	C	U	1
nad7	836	278	CCT→CUT	P→L	C	U	0.999
nad7	926	308	TCA→TUA	S→L	C	U	0.996
nad7	944	314	CCT→CUT	P→L	C	U	1
nad7	973	324	CCT→UCT	P→S	C	U	0.999
nad7	1050	350	CCC→CCU	P→P	C	U	0.966
nad7	1057	352	CGT→UGT	R→C	C	U	0.998
nad7	1079	359	TCT→TUT	S→F	C	U	0.999
nad7	1088	362	TCA→TUA	S→L	C	U	0.996
nad7	1103	367	TCT→TUT	S→F	C	U	0.999
nad7	1124	374	CCA→CUA	P→L	C	U	1
nad7	1137	379	GTC→GTU	V→V	C	U	0.941
nad7	1166	388	TCT→TUT	S→F	C	U	1
nad9	92	30	TCT→TUT	S→F	C	U	0.996
nad9	113	37	CCA→CUA	P→L	C	U	0.994
nad9	190	63	CAT→UAT	H→Y	C	U	1
nad9	298	99	CCG→UCG	P→S	C	U	0.996
nad9	328	109	CGG→UGG	R→W	C	U	1
nad9	368	122	TCC→TUC	S→F	C	U	1
nad9	398	132	TCA→TUA	S→L	C	U	0.998
nad9	439	146	CTT→UTT	L→F	C	U	0.998
nad9	539	179	TCT→TUT	S→F	C	U	0.997
rpl10	101	33	TCA→TUA	S→L	C	U	0.989
rpl10	134	44	CCA→CUA	P→L	C	U	0.994
rpl10	239	79	TCG→TUG	S→L	C	U	0.994
rpl2	181	60	CGT→UGT	R→C	C	U	0.986
rpl2	248	82	CCT→CUT	P→L	C	U	0.951
rpl5	35	11	TCA→TUA	S→L	C	U	0.958
rpl5	59	19	CCG→CUG	P→L	C	U	0.982
rpl5	64	21	CAC→UAC	H→Y	C	U	0.937
rpl5	92	30	TCG→TUG	S→L	C	U	0.999
rpl5	515	171	CCA→CUA	P→L	C	U	0.998
rps1	161	53	CCT→CUT	P→L	C	U	0.996
rps1	212	70	TCC→TUC	S→F	C	U	0.978
rps12	71	23	TCG→TUG	S→L	C	U	1
rps12	100	33	CGC→UGC	R→C	C	U	0.997
rps12	104	34	CCG→CUG	P→L	C	U	0.981
rps12	112	37	CCA→UCA	P→S	C	U	0.987
rps12	146	48	CCA→CUA	P→L	C	U	1
rps12	196	65	CAC→UAC	H→Y	C	U	0.999
rps12	269	89	TCG→TUG	S→L	C	U	0.997
rps12	284	94	TCC→TUC	S→F	C	U	1
rps13	26	8	TCA→TUA	S→L	C	U	1
rps13	56	18	TCA→TUA	S→L	C	U	0.988
rps13	100	33	CGT→UGT	R→C	C	U	0.993
rps13	243	81	TTC→TTU	F→F	C	U	0.995
rps3	64	21	CGG→UGG	R→W	C	U	1
rps3	69	23	TTC→TTU	F→F	C	U	0.984
rps3	92	30	TCA→TUA	S→L	C	U	0.999
rps3	521	173	TCA→TUA	S→L	C	U	0.991
rps3	722	240	TCG→TUG	S→L	C	U	0.906
rps3	902	300	TCG→TUG	S→L	C	U	0.932
rps3	1043	347	CCA→CUA	P→L	C	U	0.999
rps3	1376	458	CCG→CUG	P→L	C	U	1
rps3	1403	467	CCG→CUG	P→L	C	U	0.999
rps3	1567	522	CGT→UGT	R→C	C	U	0.994
rps3	1600	533	CCT→UCT	P→S	C	U	0.998
rps3	1631	543	TCA→TUA	S→L	C	U	1
rps4	50	16	CCA→CUA	P→L	C	U	0.99
rps4	62	20	TCG→TUG	S→L	C	U	0.997
rps4	74	24	CCG→CUG	P→L	C	U	0.999
rps4	91	30	CGT→UGT	R→C	C	U	0.984
rps4	119	39	CCG→CUG	P→L	C	U	0.999
rps4	218	72	GCG→GUG	A→V	C	U	0.929
rps4	266	88	TCA→TUA	S→L	C	U	0.963
rps4	707	235	TCG→TUG	S→L	C	U	0.988
rps4	718	239	CAT→UAT	H→Y	C	U	0.985
rps4	743	247	TCT→TUT	S→F	C	U	0.997
rps4	794	264	CCA→CUA	P→L	C	U	0.993
rps4	808	269	CGG→UGG	R→W	C	U	0.998
rps7	116	38	CCC→CUC	P→L	C	U	0.995
rps7	332	110	TCA→TUA	S→L	C	U	0.927

## Sheet: Oenanthe linearis
Oenanthe linearis mitogenome RNA editing sites predicted by deepredmt
Region	Position	Amino position	Codon change	Amino change	Reference	Substitution	Accuracy
atp1	1039	346	CCC→UCC	P→S	C	U	1
atp1	1064	354	TCG→TUG	S→L	C	U	0.999
atp1	1178	392	TCA→TUA	S→L	C	U	1
atp1	1216	405	CTT→UTT	L→F	C	U	0.998
atp1	1292	430	CCG→CUG	P→L	C	U	0.999
atp1	1490	496	TCA→TUA	S→L	C	U	0.996
atp4	56	18	CCA→CUA	P→L	C	U	1
atp4	59	19	TCT→TUT	S→F	C	U	0.997
atp4	71	23	TCA→TUA	S→L	C	U	0.995
atp4	89	29	TCA→TUA	S→L	C	U	1
atp4	118	39	CAT→UAT	H→Y	C	U	0.914
atp4	138	46	ATC→ATU	I→I	C	U	0.969
atp4	215	71	TCG→TUG	S→L	C	U	0.998
atp4	227	75	CCC→CUC	P→L	C	U	0.999
atp4	248	82	CCT→CUT	P→L	C	U	1
atp4	250	83	CCG→UCG	P→S	C	U	0.903
atp4	251	83	CCG→CUG	P→L	C	U	1
atp4	395	131	TCA→TUA	S→L	C	U	0.999
atp4	407	135	CCA→CUA	P→L	C	U	0.993
atp4	416	138	ACT→AUT	T→I	C	U	0.987
atp6	37	12	CCC→UCC	P→S	C	U	0.998
atp6	116	38	TCA→TUA	S→L	C	U	0.999
atp6	167	55	CCG→CUG	P→L	C	U	0.999
atp6	173	57	CCG→CUG	P→L	C	U	0.998
atp6	224	74	TCC→TUC	S→F	C	U	0.995
atp6	229	76	CGC→UGC	R→C	C	U	0.999
atp6	236	78	TCG→TUG	S→L	C	U	0.983
atp6	254	84	TCG→TUG	S→L	C	U	0.991
atp6	262	87	CGT→UGT	R→C	C	U	0.998
atp6	269	89	CCA→CUA	P→L	C	U	0.998
atp6	401	133	TCA→TUA	S→L	C	U	1
atp6	460	153	CCT→UCT	P→S	C	U	0.999
atp6	463	154	CAT→UAT	H→Y	C	U	1
atp6	485	161	TCA→TUA	S→L	C	U	0.999
atp6	527	175	TCA→TUA	S→L	C	U	1
atp6	635	211	CCG→CUG	P→L	C	U	0.999
atp6	656	218	TCA→TUA	S→L	C	U	0.998
atp6	664	221	CAT→UAT	H→Y	C	U	0.993
atp6	671	223	TCT→TUT	S→F	C	U	0.994
atp6	680	226	TCA→TUA	S→L	C	U	1
atp6	707	235	ACA→AUA	T→I	C	U	0.999
atp6	718	239	CAA→UAA	Q→*	C	U	0.936
atp8	30	10	TTC→TTU	F→F	C	U	0.937
atp8	47	15	TCA→TUA	S→L	C	U	0.996
atp8	58	19	CTC→UTC	L→F	C	U	0.996
atp8	240	80	TCC→TCU	S→S	C	U	0.991
atp8	464	154	CCA→CUA	P→L	C	U	0.995
atp9	20	6	TCA→TUA	S→L	C	U	1
atp9	205	68	CTG→UTG	L→L	C	U	0.971
atp9	215	71	TCT→TUT	S→F	C	U	0.982
atp9	223	74	CAA→UAA	Q→*	C	U	0.944
ccmB	43	14	CCC→UCC	P→S	C	U	0.995
ccmB	80	26	TCG→TUG	S→L	C	U	0.972
ccmB	87	29	ATC→ATU	I→I	C	U	0.987
ccmB	128	42	TCA→TUA	S→L	C	U	0.998
ccmB	137	45	TCC→TUC	S→F	C	U	0.988
ccmB	148	49	CCG→UCG	P→S	C	U	0.994
ccmB	149	49	CCG→CUG	P→L	C	U	0.993
ccmB	154	51	CGG→UGG	R→W	C	U	0.986
ccmB	160	53	CCT→UCT	P→S	C	U	0.958
ccmB	164	54	CCG→CUG	P→L	C	U	0.936
ccmB	172	57	CCT→UCT	P→S	C	U	0.99
ccmB	179	59	CCT→CUT	P→L	C	U	0.933
ccmB	193	64	CCT→UCT	P→S	C	U	0.944
ccmB	194	64	CCT→CUT	P→L	C	U	0.994
ccmB	304	101	CGT→UGT	R→C	C	U	0.993
ccmB	313	104	CGT→UGT	R→C	C	U	0.999
ccmB	338	112	CCG→CUG	P→L	C	U	0.997
ccmB	367	122	CGG→UGG	R→W	C	U	0.979
ccmB	379	126	CCA→UCA	P→S	C	U	0.919
ccmB	380	126	CCA→CUA	P→L	C	U	0.999
ccmB	424	141	CGT→UGT	R→C	C	U	0.994
ccmB	428	142	TCG→TUG	S→L	C	U	0.996
ccmB	467	155	TCG→TUG	S→L	C	U	0.975
ccmB	475	158	CCA→UCA	P→S	C	U	0.997
ccmB	476	158	CCA→CUA	P→L	C	U	0.996
ccmB	485	161	TCA→TUA	S→L	C	U	0.98
ccmB	494	164	TCA→TUA	S→L	C	U	0.991
ccmB	502	167	CCA→UCA	P→S	C	U	0.977
ccmB	503	167	CCA→CUA	P→L	C	U	0.982
ccmB	512	170	TCT→TUT	S→F	C	U	0.987
ccmB	514	171	CGT→UGT	R→C	C	U	0.995
ccmB	551	183	TCA→TUA	S→L	C	U	0.997
ccmB	554	184	TCG→TUG	S→L	C	U	0.994
ccmB	566	188	TCC→TUC	S→F	C	U	0.981
ccmB	569	189	TCT→TUT	S→F	C	U	0.996
ccmB	572	190	CCG→CUG	P→L	C	U	0.995
ccmB	587	195	TCT→TUT	S→F	C	U	0.999
ccmC	76	25	CGG→UGG	R→W	C	U	1
ccmC	103	34	CAT→UAT	H→Y	C	U	0.999
ccmC	115	38	CGG→UGG	R→W	C	U	0.991
ccmC	133	44	CTT→UTT	L→F	C	U	0.987
ccmC	161	53	CCG→CUG	P→L	C	U	1
ccmC	179	59	GCG→GUG	A→V	C	U	0.997
ccmC	184	61	CGG→UGG	R→W	C	U	0.983
ccmC	281	93	ACA→AUA	T→I	C	U	0.976
ccmC	299	99	TCT→TUT	S→F	C	U	0.993
ccmC	331	110	CGG→UGG	R→W	C	U	0.999
ccmC	358	119	CGG→UGG	R→W	C	U	0.998
ccmC	395	131	TCG→TUG	S→L	C	U	0.996
ccmC	399	133	TTC→TTU	F→F	C	U	0.994
ccmC	400	133	CTT→UTT	L→F	C	U	0.999
ccmC	421	140	CGT→UGT	R→C	C	U	0.999
ccmC	446	148	CCG→CUG	P→L	C	U	0.996
ccmC	451	150	CCT→UCT	P→S	C	U	0.997
ccmC	458	152	TCA→TUA	S→L	C	U	0.995
ccmC	463	154	CGT→UGT	R→C	C	U	0.991
ccmC	473	157	CCG→CUG	P→L	C	U	0.999
ccmC	497	165	TCT→TUT	S→F	C	U	0.999
ccmC	521	173	TCG→TUG	S→L	C	U	0.999
ccmC	548	182	TCT→TUT	S→F	C	U	0.994
ccmC	568	189	CCT→UCT	P→S	C	U	0.999
ccmC	575	191	CCC→CUC	P→L	C	U	0.998
ccmC	605	201	TCC→TUC	S→F	C	U	1
ccmC	608	202	CCC→CUC	P→L	C	U	1
ccmC	614	204	TCA→TUA	S→L	C	U	0.986
ccmC	619	206	CGT→UGT	R→C	C	U	0.98
ccmC	624	208	ATC→ATU	I→I	C	U	0.965
ccmC	650	216	CCT→CUT	P→L	C	U	0.99
ccmC	656	218	CCA→CUA	P→L	C	U	0.994
ccmFC	38	12	TCC→TUC	S→F	C	U	0.998
ccmFC	50	16	CCT→CUT	P→L	C	U	1
ccmFC	52	17	CGT→UGT	R→C	C	U	0.984
ccmFC	103	34	CCC→UCC	P→S	C	U	0.999
ccmFC	119	39	TCT→TUT	S→F	C	U	0.987
ccmFC	122	40	TCC→TUC	S→F	C	U	1
ccmFC	146	48	TCT→TUT	S→F	C	U	0.99
ccmFC	151	50	CCT→UCT	P→S	C	U	0.997
ccmFC	310	103	CGT→UGT	R→C	C	U	0.997
ccmFC	321	107	CCC→CCU	P→P	C	U	0.957
ccmFC	391	130	CGT→UGT	R→C	C	U	0.999
ccmFC	406	135	CGT→UGT	R→C	C	U	0.998
ccmFC	878	292	TCT→TUT	S→F	C	U	0.997
ccmFC	1139	379	CCA→CUA	P→L	C	U	0.997
ccmFC	1159	386	CCG→UCG	P→S	C	U	0.995
ccmFC	1160	386	CCG→CUG	P→L	C	U	0.998
ccmFC	1234	411	CGG→UGG	R→W	C	U	0.985
ccmFC	1268	422	TCG→TUG	S→L	C	U	0.985
ccmFC	1315	438	CGA→UGA	R→*	C	U	0.98
ccmFN	38	12	CCG→CUG	P→L	C	U	0.992
ccmFN	137	45	TCG→TUG	S→L	C	U	0.976
ccmFN	142	47	CGT→UGT	R→C	C	U	0.987
ccmFN	151	50	CCT→UCT	P→S	C	U	0.99
ccmFN	248	82	TCA→TUA	S→L	C	U	0.999
ccmFN	256	85	CGG→UGG	R→W	C	U	0.999
ccmFN	283	94	CTT→UTT	L→F	C	U	0.995
ccmFN	365	121	TCG→TUG	S→L	C	U	0.965
ccmFN	372	124	TTC→TTU	F→F	C	U	0.989
ccmFN	713	237	CCT→CUT	P→L	C	U	0.999
ccmFN	722	240	TCA→TUA	S→L	C	U	0.997
ccmFN	760	253	CGT→UGT	R→C	C	U	0.995
ccmFN	782	260	TCA→TUA	S→L	C	U	0.981
ccmFN	794	264	CCA→CUA	P→L	C	U	0.999
ccmFN	809	269	TCA→TUA	S→L	C	U	0.991
ccmFN	958	319	CGC→UGC	R→C	C	U	0.994
ccmFN	999	333	CTC→CTU	L→L	C	U	0.921
ccmFN	1276	425	CGG→UGG	R→W	C	U	0.992
ccmFN	1304	434	CCA→CUA	P→L	C	U	1
ccmFN	1321	440	CAT→UAT	H→Y	C	U	1
ccmFN	1336	445	CGG→UGG	R→W	C	U	0.999
ccmFN	1354	451	CGG→UGG	R→W	C	U	0.999
ccmFN	1387	462	CGG→UGG	R→W	C	U	1
ccmFN	1405	468	CGT→UGT	R→C	C	U	0.996
ccmFN	1448	482	TCG→TUG	S→L	C	U	0.999
ccmFN	1468	489	CTT→UTT	L→F	C	U	0.998
ccmFN	1472	490	CCA→CUA	P→L	C	U	0.995
ccmFN	1484	494	TCA→TUA	S→L	C	U	1
ccmFN	1493	497	TCT→TUT	S→F	C	U	0.998
ccmFN	1519	506	CCC→UCC	P→S	C	U	0.999
cob	118	39	CCG→UCG	P→S	C	U	0.999
cob	286	95	CTC→UTC	L→F	C	U	1
cob	298	99	CAC→UAC	H→Y	C	U	0.996
cob	358	119	CGG→UGG	R→W	C	U	0.997
cob	419	139	CCA→CUA	P→L	C	U	1
cob	680	226	TCT→TUT	S→F	C	U	0.987
cob	737	245	TCT→TUT	S→F	C	U	0.972
cob	808	269	CCC→UCC	P→S	C	U	1
cob	853	284	CAT→UAT	H→Y	C	U	0.999
cob	908	302	CCA→CUA	P→L	C	U	0.998
cob	1018	339	CGC→UGC	R→C	C	U	0.947
cob	1087	362	CCT→UCT	P→S	C	U	0.965
cob	1127	375	CCG→CUG	P→L	C	U	0.954
cox1	11	3	CCG→CUG	P→L	C	U	0.997
cox1	15	5	GTC→GTU	V→V	C	U	0.961
cox1	242	80	TCT→TUT	S→F	C	U	0.998
cox1	254	84	TCT→TUT	S→F	C	U	1
cox1	352	117	CCA→UCA	P→S	C	U	0.998
cox1	443	147	TCA→TUA	S→L	C	U	0.993
cox1	452	150	TCT→TUT	S→F	C	U	0.999
cox1	458	152	CCT→CUT	P→L	C	U	1
cox1	515	171	TCC→TUC	S→F	C	U	1
cox1	551	183	TCA→TUA	S→L	C	U	1
cox1	590	196	CCA→CUA	P→L	C	U	0.999
cox1	668	222	TCT→TUT	S→F	C	U	0.999
cox1	715	238	CGG→UGG	R→W	C	U	0.987
cox1	746	248	CCC→CUC	P→L	C	U	0.998
cox1	761	253	TCC→TUC	S→F	C	U	0.996
cox1	1079	359	CCG→CUG	P→L	C	U	1
cox1	1186	395	CAC→UAC	H→Y	C	U	1
cox1	1274	424	CCG→CUG	P→L	C	U	0.998
cox1	1405	468	CGT→UGT	R→C	C	U	1
cox1	1433	477	TCA→TUA	S→L	C	U	0.997
cox1	1446	482	AAC→AAU	N→N	C	U	0.982
cox1	1489	496	CCA→UCA	P→S	C	U	0.986
cox1	1499	499	CCG→CUG	P→L	C	U	0.988
cox2	74	24	TCT→TUT	S→F	C	U	1
cox2	164	54	TCA→TUA	S→L	C	U	0.985
cox2	166	55	CGG→UGG	R→W	C	U	0.998
cox2	256	85	CGG→UGG	R→W	C	U	0.998
cox2	281	93	CCG→CUG	P→L	C	U	0.998
cox2	382	127	CGG→UGG	R→W	C	U	0.999
cox2	446	148	ACG→AUG	T→M	C	U	0.999
cox2	464	154	CCA→CUA	P→L	C	U	0.991
cox2	479	159	TCA→TUA	S→L	C	U	0.998
cox2	547	182	CCT→UCT	P→S	C	U	0.999
cox2	560	186	CCT→CUT	P→L	C	U	0.996
cox2	584	194	TCA→TUA	S→L	C	U	0.999
cox2	635	211	TCG→TUG	S→L	C	U	0.999
cox2	701	233	ACG→AUG	T→M	C	U	1
cox2	745	248	CGG→UGG	R→W	C	U	0.999
cox3	112	37	CCA→UCA	P→S	C	U	1
cox3	245	81	CCT→CUT	P→L	C	U	1
cox3	289	96	CTT→UTT	L→F	C	U	1
cox3	311	103	TCT→TUT	S→F	C	U	0.994
cox3	314	104	TCT→TUT	S→F	C	U	0.999
cox3	422	140	CCT→CUT	P→L	C	U	0.996
cox3	512	170	TCA→TUA	S→L	C	U	0.999
cox3	566	188	TCC→TUC	S→F	C	U	1
cox3	754	251	CGG→UGG	R→W	C	U	1
cox3	764	254	CCA→CUA	P→L	C	U	1
matR	235	78	CCC→UCC	P→S	C	U	0.996
matR	236	78	CCC→CUC	P→L	C	U	0.956
matR	326	108	CCA→CUA	P→L	C	U	0.983
matR	413	137	TCG→TUG	S→L	C	U	0.973
matR	1679	559	TCC→TUC	S→F	C	U	0.996
matR	1700	566	CCT→CUT	P→L	C	U	0.999
matR	1720	573	CGC→UGC	R→C	C	U	1
matR	1734	578	TAC→TAU	Y→Y	C	U	0.996
matR	1756	585	CAC→UAC	H→Y	C	U	0.995
matR	1787	595	CCG→CUG	P→L	C	U	0.997
matR	1826	608	CCA→CUA	P→L	C	U	0.998
matR	1844	614	TCA→TUA	S→L	C	U	0.999
mttB	16	5	CAT→UAT	H→Y	C	U	0.982
mttB	25	8	CCG→UCG	P→S	C	U	0.989
mttB	26	8	CCG→CUG	P→L	C	U	0.995
mttB	64	21	CGG→UGG	R→W	C	U	0.992
mttB	100	33	CGT→UGT	R→C	C	U	0.999
mttB	112	37	CCG→UCG	P→S	C	U	0.998
mttB	128	42	TCT→TUT	S→F	C	U	0.996
mttB	131	43	CCA→CUA	P→L	C	U	0.985
mttB	178	59	CGT→UGT	R→C	C	U	0.998
mttB	188	62	TCA→TUA	S→L	C	U	1
mttB	200	66	TCC→TUC	S→F	C	U	1
mttB	202	67	CCG→UCG	P→S	C	U	0.999
mttB	223	74	CCA→UCA	P→S	C	U	1
mttB	262	87	CAT→UAT	H→Y	C	U	0.991
mttB	328	109	CTC→UTC	L→F	C	U	0.984
mttB	331	110	CAT→UAT	H→Y	C	U	0.983
mttB	344	114	TCT→TUT	S→F	C	U	0.933
mttB	346	115	CGC→UGC	R→C	C	U	0.999
mttB	373	124	CTT→UTT	L→F	C	U	0.929
mttB	376	125	CCC→UCC	P→S	C	U	0.987
mttB	379	126	CGG→UGG	R→W	C	U	0.945
mttB	407	135	CCA→CUA	P→L	C	U	0.998
mttB	459	153	CCC→CCU	P→P	C	U	0.998
mttB	472	157	CAT→UAT	H→Y	C	U	0.998
mttB	497	165	TCG→TUG	S→L	C	U	0.994
mttB	505	168	CCA→UCA	P→S	C	U	0.978
mttB	541	180	CGT→UGT	R→C	C	U	0.997
mttB	548	182	CCA→CUA	P→L	C	U	0.999
mttB	554	184	CCA→CUA	P→L	C	U	0.998
mttB	578	192	TCC→TUC	S→F	C	U	0.997
mttB	610	203	CCG→UCG	P→S	C	U	0.996
mttB	660	220	ATC→ATU	I→I	C	U	0.997
mttB	667	222	CGT→UGT	R→C	C	U	0.997
mttB	672	224	TTC→TTU	F→F	C	U	0.932
mttB	704	234	TCT→TUT	S→F	C	U	1
mttB	713	237	TCG→TUG	S→L	C	U	0.998
nad1	265	88	CGG→UGG	R→W	C	U	0.999
nad1	307	102	CCG→UCG	P→S	C	U	0.995
nad1	308	102	CCG→CUG	P→L	C	U	1
nad1	376	125	CGG→UGG	R→W	C	U	0.999
nad1	436	145	CCT→UCT	P→S	C	U	0.998
nad1	490	163	CCC→UCC	P→S	C	U	0.997
nad1	492	164	CCC→CCU	P→P	C	U	0.989
nad1	493	164	CGT→UGT	R→C	C	U	0.995
nad1	500	166	TCG→TUG	S→L	C	U	1
nad1	536	178	TCT→TUT	S→F	C	U	0.998
nad1	580	193	CGT→UGT	R→C	C	U	0.992
nad1	635	211	TCA→TUA	S→L	C	U	0.999
nad1	674	224	TCT→TUT	S→F	C	U	1
nad1	683	227	TCT→TUT	S→F	C	U	0.999
nad1	725	241	CCA→CUA	P→L	C	U	0.995
nad1	734	244	TCG→TUG	S→L	C	U	0.958
nad1	755	251	CCG→CUG	P→L	C	U	0.913
nad1	779	259	TCC→TUC	S→F	C	U	0.998
nad1	802	267	CGG→UGG	R→W	C	U	1
nad1	830	276	CCT→CUT	P→L	C	U	0.996
nad1	898	299	CGG→UGG	R→W	C	U	0.999
nad1	928	309	CGG→UGG	R→W	C	U	0.999
nad1	937	312	CCC→UCC	P→S	C	U	0.988
nad2	26	8	TCC→TUC	S→F	C	U	0.996
nad2	223	74	CTT→UTT	L→F	C	U	0.997
nad2	308	102	TCT→TUT	S→F	C	U	0.997
nad2	311	103	TCC→TUC	S→F	C	U	0.999
nad2	335	111	TCT→TUT	S→F	C	U	1
nad2	341	113	TCC→TUC	S→F	C	U	0.999
nad2	356	118	CCA→CUA	P→L	C	U	0.996
nad2	361	120	CCT→UCT	P→S	C	U	0.999
nad2	367	122	CGC→UGC	R→C	C	U	0.989
nad2	401	133	TCA→TUA	S→L	C	U	0.998
nad2	428	142	CCT→CUT	P→L	C	U	0.999
nad2	497	165	TCG→TUG	S→L	C	U	0.997
nad2	523	174	CCC→UCC	P→S	C	U	0.997
nad2	662	220	TCT→TUT	S→F	C	U	0.999
nad2	677	225	TCC→TUC	S→F	C	U	0.997
nad2	788	262	TCT→TUT	S→F	C	U	0.999
nad2	800	266	TCA→TUA	S→L	C	U	0.966
nad2	809	269	TCT→TUT	S→F	C	U	0.999
nad2	928	309	CAT→UAT	H→Y	C	U	0.995
nad2	958	319	CGT→UGT	R→C	C	U	0.998
nad2	962	320	ACT→AUT	T→I	C	U	0.985
nad2	1028	342	TCA→TUA	S→L	C	U	0.999
nad2	1058	352	TCA→TUA	S→L	C	U	0.997
nad2	1127	375	TCG→TUG	S→L	C	U	0.999
nad2	1246	415	CCA→UCA	P→S	C	U	0.999
nad2	1276	425	CGT→UGT	R→C	C	U	1
nad2	1298	432	GCG→GUG	A→V	C	U	1
nad2	1400	466	TCA→TUA	S→L	C	U	0.964
nad2	1408	469	CCA→UCA	P→S	C	U	0.976
nad2	1409	469	CCA→CUA	P→L	C	U	0.991
nad2	1416	472	CCC→CCU	P→P	C	U	0.976
nad2	1457	485	TCA→TUA	S→L	C	U	0.997
nad3	5	1	TCA→TUA	S→L	C	U	0.966
nad3	44	14	CCG→CUG	P→L	C	U	1
nad3	62	20	CCA→CUA	P→L	C	U	0.998
nad3	208	69	CCT→UCT	P→S	C	U	0.998
nad3	209	69	CCT→CUT	P→L	C	U	0.996
nad3	215	71	CCG→CUG	P→L	C	U	0.992
nad3	230	76	TCC→TUC	S→F	C	U	0.999
nad3	247	82	CCT→UCT	P→S	C	U	0.996
nad3	266	88	CCG→CUG	P→L	C	U	1
nad3	275	91	TCT→TUT	S→F	C	U	0.998
nad3	317	105	TCT→TUT	S→F	C	U	1
nad3	344	114	TCG→TUG	S→L	C	U	0.999
nad3	349	116	CGG→UGG	R→W	C	U	0.999
nad4	29	9	TCT→TUT	S→F	C	U	1
nad4	44	14	CCT→CUT	P→L	C	U	0.999
nad4	74	24	ACT→AUT	T→I	C	U	0.997
nad4	77	25	CCT→CUT	P→L	C	U	0.999
nad4	107	35	CCG→CUG	P→L	C	U	0.999
nad4	154	51	CCC→UCC	P→S	C	U	1
nad4	158	52	CCT→CUT	P→L	C	U	0.997
nad4	166	55	CGG→UGG	R→W	C	U	0.992
nad4	197	65	TCT→TUT	S→F	C	U	0.998
nad4	317	105	TCA→TUA	S→L	C	U	0.999
nad4	362	120	ACA→AUA	T→I	C	U	0.999
nad4	368	122	TCT→TUT	S→F	C	U	0.996
nad4	376	125	CGT→UGT	R→C	C	U	0.995
nad4	403	134	CGC→UGC	R→C	C	U	0.999
nad4	416	138	CCT→CUT	P→L	C	U	0.997
nad4	436	145	CCC→UCC	P→S	C	U	0.999
nad4	437	145	CCC→CUC	P→L	C	U	0.987
nad4	449	149	CCA→CUA	P→L	C	U	0.995
nad4	608	202	TCA→TUA	S→L	C	U	0.999
nad4	659	219	TCT→TUT	S→F	C	U	0.999
nad4	710	236	TCA→TUA	S→L	C	U	1
nad4	767	255	CCT→CUT	P→L	C	U	0.999
nad4	836	278	TCC→TUC	S→F	C	U	0.99
nad4	857	285	TCA→TUA	S→L	C	U	1
nad4	887	295	TCG→TUG	S→L	C	U	1
nad4	934	311	CCA→UCA	P→S	C	U	0.999
nad4	977	325	CCG→CUG	P→L	C	U	1
nad4	1006	335	CCA→UCA	P→S	C	U	0.986
nad4	1007	335	CCA→CUA	P→L	C	U	0.992
nad4	1010	336	CCG→CUG	P→L	C	U	1
nad4	1016	338	TCA→TUA	S→L	C	U	1
nad4	1033	344	CCC→UCC	P→S	C	U	0.999
nad4	1101	367	TAC→TAU	Y→Y	C	U	0.906
nad4	1109	369	TCA→TUA	S→L	C	U	0.999
nad4	1129	376	CTC→UTC	L→F	C	U	0.995
nad4	1132	377	CCT→UCT	P→S	C	U	1
nad4	1148	382	TCT→TUT	S→F	C	U	0.996
nad4	1151	383	TCC→TUC	S→F	C	U	0.992
nad4	1172	390	TCA→TUA	S→L	C	U	1
nad4	1307	435	GCG→GUG	A→V	C	U	0.992
nad4	1355	451	CCA→CUA	P→L	C	U	0.995
nad4	1373	457	TCC→TUC	S→F	C	U	0.998
nad4	1405	468	CGG→UGG	R→W	C	U	0.999
nad4	1417	472	CAC→UAC	H→Y	C	U	0.999
nad4	1433	477	CCG→CUG	P→L	C	U	0.999
nad4	1438	479	CGC→UGC	R→C	C	U	0.991
nad4L	2	0	ACG→AUG	T→M	C	U	0.914
nad4L	41	13	TCT→TUT	S→F	C	U	0.993
nad4L	47	15	TCA→TUA	S→L	C	U	0.999
nad4L	55	18	CGG→UGG	R→W	C	U	0.992
nad4L	86	28	CCT→CUT	P→L	C	U	0.967
nad4L	95	31	TCA→TUA	S→L	C	U	1
nad4L	100	33	CCA→UCA	P→S	C	U	0.999
nad4L	110	36	TCA→TUA	S→L	C	U	0.998
nad4L	131	43	TCG→TUG	S→L	C	U	1
nad4L	158	52	TCG→TUG	S→L	C	U	0.997
nad4L	179	59	TCA→TUA	S→L	C	U	1
nad4L	188	62	TCA→TUA	S→L	C	U	0.997
nad4L	196	65	CCA→UCA	P→S	C	U	0.905
nad4L	197	65	CCA→CUA	P→L	C	U	0.992
nad4L	281	93	TCT→TUT	S→F	C	U	0.999
nad5	155	51	CCG→CUG	P→L	C	U	1
nad5	242	80	CCG→CUG	P→L	C	U	1
nad5	272	90	TCC→TUC	S→F	C	U	0.999
nad5	358	119	CCT→UCT	P→S	C	U	0.994
nad5	359	119	CCT→CUT	P→L	C	U	0.999
nad5	374	124	CCA→CUA	P→L	C	U	0.996
nad5	398	132	TCT→TUT	S→F	C	U	1
nad5	539	179	CCT→CUT	P→L	C	U	0.999
nad5	548	182	TCG→TUG	S→L	C	U	0.999
nad5	598	199	CGT→UGT	R→C	C	U	0.999
nad5	608	202	GCC→GUC	A→V	C	U	0.993
nad5	629	209	TCT→TUT	S→F	C	U	0.999
nad5	631	210	CGC→UGC	R→C	C	U	0.996
nad5	676	225	CTT→UTT	L→F	C	U	1
nad5	713	237	TCG→TUG	S→L	C	U	0.999
nad5	725	241	TCA→TUA	S→L	C	U	1
nad5	835	278	CCG→UCG	P→S	C	U	1
nad5	1184	394	CCA→CUA	P→L	C	U	1
nad5	1490	496	CCC→CUC	P→L	C	U	0.999
nad5	1550	516	ACC→AUC	T→I	C	U	0.995
nad5	1568	522	CCG→CUG	P→L	C	U	1
nad5	1580	526	TCA→TUA	S→L	C	U	0.998
nad5	1589	529	TCT→TUT	S→F	C	U	0.985
nad5	1610	536	CCC→CUC	P→L	C	U	0.999
nad5	1895	631	TCA→TUA	S→L	C	U	0.998
nad5	1916	638	TCT→TUT	S→F	C	U	0.999
nad5	1918	639	CGT→UGT	R→C	C	U	0.999
nad5	1958	652	TCG→TUG	S→L	C	U	0.991
nad6	83	27	TCG→TUG	S→L	C	U	1
nad6	89	29	TCC→TUC	S→F	C	U	0.972
nad6	95	31	CCA→CUA	P→L	C	U	0.987
nad6	103	34	CGC→UGC	R→C	C	U	0.994
nad6	161	53	CCA→CUA	P→L	C	U	0.996
nad6	191	63	TCA→TUA	S→L	C	U	0.999
nad6	446	148	TCC→TUC	S→F	C	U	0.999
nad6	447	149	TCC→TCU	S→S	C	U	0.909
nad6	463	154	CCT→UCT	P→S	C	U	0.996
nad6	569	189	TCT→TUT	S→F	C	U	1
nad7	38	12	TCG→TUG	S→L	C	U	0.999
nad7	45	15	TTC→TTU	F→F	C	U	0.997
nad7	77	25	TCA→TUA	S→L	C	U	0.999
nad7	137	45	TCA→TUA	S→L	C	U	0.999
nad7	200	66	TCT→TUT	S→F	C	U	0.995
nad7	224	74	ACG→AUG	T→M	C	U	1
nad7	244	81	CAT→UAT	H→Y	C	U	0.999
nad7	251	83	TCA→TUA	S→L	C	U	0.993
nad7	316	105	CGT→UGT	R→C	C	U	0.997
nad7	335	111	TCA→TUA	S→L	C	U	0.999
nad7	344	114	TCA→TUA	S→L	C	U	0.999
nad7	383	127	TCA→TUA	S→L	C	U	1
nad7	533	177	TCC→TUC	S→F	C	U	0.998
nad7	578	192	TCA→TUA	S→L	C	U	1
nad7	679	226	CCA→UCA	P→S	C	U	0.987
nad7	698	232	TCG→TUG	S→L	C	U	1
nad7	724	241	CAT→UAT	H→Y	C	U	1
nad7	739	246	CCT→UCT	P→S	C	U	0.999
nad7	740	246	CCT→CUT	P→L	C	U	0.999
nad7	769	256	CGC→UGC	R→C	C	U	1
nad7	836	278	CCT→CUT	P→L	C	U	0.998
nad7	926	308	TCA→TUA	S→L	C	U	0.999
nad7	944	314	CCT→CUT	P→L	C	U	0.999
nad7	973	324	CCT→UCT	P→S	C	U	0.999
nad7	1050	350	CCC→CCU	P→P	C	U	0.966
nad7	1057	352	CGT→UGT	R→C	C	U	0.998
nad7	1079	359	TCT→TUT	S→F	C	U	0.999
nad7	1088	362	TCA→TUA	S→L	C	U	0.996
nad7	1103	367	TCT→TUT	S→F	C	U	0.999
nad7	1124	374	CCA→CUA	P→L	C	U	1
nad7	1137	379	GTC→GTU	V→V	C	U	0.941
nad7	1166	388	TCT→TUT	S→F	C	U	1
nad9	92	30	TCT→TUT	S→F	C	U	0.996
nad9	113	37	CCA→CUA	P→L	C	U	0.994
nad9	190	63	CAT→UAT	H→Y	C	U	1
nad9	298	99	CCG→UCG	P→S	C	U	0.996
nad9	328	109	CGG→UGG	R→W	C	U	1
nad9	368	122	TCC→TUC	S→F	C	U	1
nad9	398	132	TCA→TUA	S→L	C	U	0.998
nad9	439	146	CTT→UTT	L→F	C	U	0.998
nad9	539	179	TCT→TUT	S→F	C	U	0.997
rpl10	101	33	TCA→TUA	S→L	C	U	0.989
rpl10	134	44	CCA→CUA	P→L	C	U	0.994
rpl16	102	34	GGC→GGU	G→G	C	U	0.935
rpl16	104	34	ACT→AUT	T→I	C	U	1
rpl16	232	77	CTC→UTC	L→F	C	U	0.995
rpl16	321	107	TCC→TCU	S→S	C	U	0.903
rpl16	401	133	CCA→CUA	P→L	C	U	0.997
rpl16	407	135	TCG→TUG	S→L	C	U	0.992
rpl5	62	20	CCG→CUG	P→L	C	U	0.982
rpl5	95	31	TCG→TUG	S→L	C	U	0.995
rpl5	175	58	CGC→UGC	R→C	C	U	0.993
rpl5	512	170	CCA→CUA	P→L	C	U	0.991
rps10	62	20	ACG→AUG	T→M	C	U	0.997
rps10	76	25	CGC→UGC	R→C	C	U	0.949
rps12	71	23	TCG→TUG	S→L	C	U	1
rps12	100	33	CGC→UGC	R→C	C	U	0.997
rps12	104	34	CCG→CUG	P→L	C	U	0.981
rps12	112	37	CCA→UCA	P→S	C	U	0.987
rps12	146	48	CCA→CUA	P→L	C	U	1
rps12	196	65	CAC→UAC	H→Y	C	U	0.999
rps12	269	89	TCG→TUG	S→L	C	U	0.997
rps12	284	94	TCC→TUC	S→F	C	U	1
rps13	26	8	TCA→TUA	S→L	C	U	0.999
rps13	56	18	TCA→TUA	S→L	C	U	0.924
rps13	100	33	CGT→UGT	R→C	C	U	0.964
rps13	243	81	TTC→TTU	F→F	C	U	0.908
rps3	64	21	CGG→UGG	R→W	C	U	1
rps3	69	23	TTC→TTU	F→F	C	U	0.984
rps3	92	30	TCA→TUA	S→L	C	U	0.999
rps3	536	178	TCA→TUA	S→L	C	U	0.991
rps3	917	305	TCG→TUG	S→L	C	U	0.932
rps3	1058	352	CCA→CUA	P→L	C	U	0.999
rps3	1382	460	CCG→CUG	P→L	C	U	1
rps3	1409	469	CCG→CUG	P→L	C	U	1
rps3	1573	524	CGT→UGT	R→C	C	U	0.997
rps3	1606	535	CCT→UCT	P→S	C	U	0.998
rps3	1637	545	TCA→TUA	S→L	C	U	1
rps4	50	16	TCA→TUA	S→L	C	U	0.97
rps4	176	58	TCA→TUA	S→L	C	U	0.996
rps4	196	65	CCC→UCC	P→S	C	U	0.999
rps4	205	68	CAT→UAT	H→Y	C	U	0.988
rps4	278	92	CCA→CUA	P→L	C	U	0.99
rps4	290	96	TCG→TUG	S→L	C	U	0.997
rps4	302	100	CCG→CUG	P→L	C	U	0.999
rps4	319	106	CGT→UGT	R→C	C	U	0.984
rps4	347	115	CCG→CUG	P→L	C	U	0.989
rps4	446	148	GCG→GUG	A→V	C	U	0.929
rps4	494	164	TCA→TUA	S→L	C	U	0.995
rps4	1047	349	ATC→ATU	I→I	C	U	0.9
rps4	1067	355	TCG→TUG	S→L	C	U	0.988
rps4	1078	359	CAT→UAT	H→Y	C	U	0.985
rps4	1103	367	TCT→TUT	S→F	C	U	0.997
rps4	1154	384	CCA→CUA	P→L	C	U	0.993
rps4	1168	389	CGG→UGG	R→W	C	U	0.998
rps7	116	38	CCA→CUA	P→L	C	U	0.992
rps7	332	110	TCA→TUA	S→L	C	U	0.982
sdh4	29	9	TCG→TUG	S→L	C	U	1
sdh4	39	13	CCC→CCU	P→P	C	U	1

## Sheet: Oenanthe thomsonii
Oenanthe thomsonii mitogenome RNA editing sites predicted by deepredmt
Region	Position	Amino position	Codon change	Amino change	Reference	Substitution	Accuracy
atp1	1039	346	CCC→UCC	P→S	C	U	1
atp1	1064	354	TCG→TUG	S→L	C	U	0.999
atp1	1178	392	TCA→TUA	S→L	C	U	1
atp1	1216	405	CTT→UTT	L→F	C	U	0.998
atp1	1292	430	CCG→CUG	P→L	C	U	0.999
atp1	1490	496	TCA→TUA	S→L	C	U	0.996
atp4	56	18	CCA→CUA	P→L	C	U	1
atp4	59	19	TCT→TUT	S→F	C	U	0.997
atp4	71	23	TCA→TUA	S→L	C	U	0.995
atp4	89	29	TCA→TUA	S→L	C	U	1
atp4	118	39	CGT→UGT	R→C	C	U	0.974
atp4	215	71	TCG→TUG	S→L	C	U	0.998
atp4	227	75	CCC→CUC	P→L	C	U	0.999
atp4	248	82	CCT→CUT	P→L	C	U	1
atp4	250	83	CCG→UCG	P→S	C	U	0.903
atp4	251	83	CCG→CUG	P→L	C	U	1
atp4	395	131	TCA→TUA	S→L	C	U	0.999
atp4	407	135	CCA→CUA	P→L	C	U	0.993
atp4	416	138	ACT→AUT	T→I	C	U	0.987
atp6	37	12	CCC→UCC	P→S	C	U	0.998
atp6	116	38	TCA→TUA	S→L	C	U	0.999
atp6	167	55	CCG→CUG	P→L	C	U	0.999
atp6	173	57	CCG→CUG	P→L	C	U	0.998
atp6	224	74	TCC→TUC	S→F	C	U	0.995
atp6	229	76	CGC→UGC	R→C	C	U	0.999
atp6	236	78	TCG→TUG	S→L	C	U	0.983
atp6	254	84	TCG→TUG	S→L	C	U	0.991
atp6	262	87	CGT→UGT	R→C	C	U	0.998
atp6	269	89	CCA→CUA	P→L	C	U	0.998
atp6	401	133	TCA→TUA	S→L	C	U	1
atp6	460	153	CCT→UCT	P→S	C	U	0.999
atp6	463	154	CAT→UAT	H→Y	C	U	1
atp6	485	161	TCA→TUA	S→L	C	U	0.999
atp6	527	175	TCA→TUA	S→L	C	U	1
atp6	635	211	CCG→CUG	P→L	C	U	0.999
atp6	656	218	TCA→TUA	S→L	C	U	0.998
atp6	664	221	CAT→UAT	H→Y	C	U	0.993
atp6	671	223	TCT→TUT	S→F	C	U	0.994
atp6	680	226	TCA→TUA	S→L	C	U	1
atp6	707	235	ACA→AUA	T→I	C	U	0.999
atp6	718	239	CAA→UAA	Q→*	C	U	0.936
atp8	30	10	TTC→TTU	F→F	C	U	0.937
atp8	47	15	TCA→TUA	S→L	C	U	0.996
atp8	58	19	CTC→UTC	L→F	C	U	0.996
atp8	240	80	TCC→TCU	S→S	C	U	0.991
atp8	464	154	CCA→CUA	P→L	C	U	0.987
atp9	20	6	TCA→TUA	S→L	C	U	1
atp9	205	68	CTG→UTG	L→L	C	U	0.981
atp9	223	74	CAA→UAA	Q→*	C	U	0.942
ccmB	43	14	CCC→UCC	P→S	C	U	0.995
ccmB	80	26	TCG→TUG	S→L	C	U	0.972
ccmB	87	29	ATC→ATU	I→I	C	U	0.987
ccmB	128	42	TCA→TUA	S→L	C	U	0.998
ccmB	137	45	TCC→TUC	S→F	C	U	0.988
ccmB	148	49	CCG→UCG	P→S	C	U	0.994
ccmB	149	49	CCG→CUG	P→L	C	U	0.993
ccmB	154	51	CGG→UGG	R→W	C	U	0.986
ccmB	160	53	CCT→UCT	P→S	C	U	0.958
ccmB	164	54	CCG→CUG	P→L	C	U	0.936
ccmB	172	57	CCT→UCT	P→S	C	U	0.99
ccmB	179	59	CCT→CUT	P→L	C	U	0.933
ccmB	193	64	CCT→UCT	P→S	C	U	0.944
ccmB	194	64	CCT→CUT	P→L	C	U	0.994
ccmB	304	101	CGT→UGT	R→C	C	U	0.993
ccmB	313	104	CGT→UGT	R→C	C	U	0.999
ccmB	338	112	CCG→CUG	P→L	C	U	0.997
ccmB	367	122	CGG→UGG	R→W	C	U	0.979
ccmB	379	126	CCA→UCA	P→S	C	U	0.919
ccmB	380	126	CCA→CUA	P→L	C	U	0.999
ccmB	424	141	CGT→UGT	R→C	C	U	0.994
ccmB	428	142	TCG→TUG	S→L	C	U	0.996
ccmB	467	155	TCG→TUG	S→L	C	U	0.975
ccmB	475	158	CCA→UCA	P→S	C	U	0.997
ccmB	476	158	CCA→CUA	P→L	C	U	0.996
ccmB	485	161	TCA→TUA	S→L	C	U	0.98
ccmB	494	164	TCA→TUA	S→L	C	U	0.991
ccmB	502	167	CCA→UCA	P→S	C	U	0.977
ccmB	503	167	CCA→CUA	P→L	C	U	0.982
ccmB	512	170	TCT→TUT	S→F	C	U	0.987
ccmB	514	171	CGT→UGT	R→C	C	U	0.995
ccmB	551	183	TCA→TUA	S→L	C	U	0.997
ccmB	554	184	TCG→TUG	S→L	C	U	0.994
ccmB	566	188	TCC→TUC	S→F	C	U	0.981
ccmB	569	189	TCT→TUT	S→F	C	U	0.996
ccmB	572	190	CCG→CUG	P→L	C	U	0.995
ccmB	587	195	TCT→TUT	S→F	C	U	0.999
ccmC	76	25	CGG→UGG	R→W	C	U	1
ccmC	103	34	CAT→UAT	H→Y	C	U	0.999
ccmC	115	38	CGG→UGG	R→W	C	U	0.991
ccmC	133	44	CTT→UTT	L→F	C	U	0.987
ccmC	161	53	CCG→CUG	P→L	C	U	1
ccmC	179	59	GCG→GUG	A→V	C	U	0.997
ccmC	184	61	CGG→UGG	R→W	C	U	0.983
ccmC	281	93	ACA→AUA	T→I	C	U	0.976
ccmC	299	99	TCT→TUT	S→F	C	U	0.993
ccmC	331	110	CGG→UGG	R→W	C	U	0.999
ccmC	358	119	CGG→UGG	R→W	C	U	0.998
ccmC	395	131	TCG→TUG	S→L	C	U	0.996
ccmC	399	133	TTC→TTU	F→F	C	U	0.994
ccmC	400	133	CTT→UTT	L→F	C	U	0.999
ccmC	421	140	CGT→UGT	R→C	C	U	0.999
ccmC	446	148	CCG→CUG	P→L	C	U	0.996
ccmC	451	150	CCT→UCT	P→S	C	U	0.997
ccmC	458	152	TCA→TUA	S→L	C	U	0.995
ccmC	463	154	CGT→UGT	R→C	C	U	0.991
ccmC	473	157	CCG→CUG	P→L	C	U	0.999
ccmC	497	165	TCT→TUT	S→F	C	U	0.999
ccmC	521	173	TCG→TUG	S→L	C	U	0.999
ccmC	548	182	TCT→TUT	S→F	C	U	0.994
ccmC	568	189	CCT→UCT	P→S	C	U	0.999
ccmC	575	191	CCC→CUC	P→L	C	U	0.998
ccmC	605	201	TCC→TUC	S→F	C	U	1
ccmC	608	202	CCC→CUC	P→L	C	U	1
ccmC	614	204	TCA→TUA	S→L	C	U	0.986
ccmC	619	206	CGT→UGT	R→C	C	U	0.98
ccmC	624	208	ATC→ATU	I→I	C	U	0.965
ccmC	650	216	CCT→CUT	P→L	C	U	0.99
ccmC	656	218	CCA→CUA	P→L	C	U	0.994
ccmFC	38	12	TCC→TUC	S→F	C	U	0.998
ccmFC	50	16	CCT→CUT	P→L	C	U	1
ccmFC	52	17	CGT→UGT	R→C	C	U	0.984
ccmFC	103	34	CCC→UCC	P→S	C	U	0.999
ccmFC	119	39	TCT→TUT	S→F	C	U	0.987
ccmFC	122	40	TCC→TUC	S→F	C	U	1
ccmFC	146	48	TCT→TUT	S→F	C	U	0.99
ccmFC	151	50	CCT→UCT	P→S	C	U	0.997
ccmFC	310	103	CGT→UGT	R→C	C	U	0.997
ccmFC	321	107	CCC→CCU	P→P	C	U	0.957
ccmFC	391	130	CGT→UGT	R→C	C	U	0.999
ccmFC	406	135	CGT→UGT	R→C	C	U	0.998
ccmFC	878	292	TCT→TUT	S→F	C	U	0.997
ccmFC	1139	379	CCA→CUA	P→L	C	U	0.997
ccmFC	1159	386	CCG→UCG	P→S	C	U	0.995
ccmFC	1160	386	CCG→CUG	P→L	C	U	0.998
ccmFC	1234	411	CGG→UGG	R→W	C	U	0.985
ccmFC	1268	422	TCG→TUG	S→L	C	U	0.985
ccmFC	1315	438	CGA→UGA	R→*	C	U	0.98
ccmFN	38	12	CCG→CUG	P→L	C	U	0.99
ccmFN	137	45	TCG→TUG	S→L	C	U	0.976
ccmFN	142	47	CGT→UGT	R→C	C	U	0.987
ccmFN	151	50	CCT→UCT	P→S	C	U	0.99
ccmFN	248	82	TCA→TUA	S→L	C	U	0.999
ccmFN	256	85	CGG→UGG	R→W	C	U	0.999
ccmFN	283	94	CTT→UTT	L→F	C	U	0.995
ccmFN	365	121	TCG→TUG	S→L	C	U	0.965
ccmFN	372	124	TTC→TTU	F→F	C	U	0.989
ccmFN	713	237	CCT→CUT	P→L	C	U	0.999
ccmFN	722	240	TCA→TUA	S→L	C	U	0.997
ccmFN	760	253	CGT→UGT	R→C	C	U	0.998
ccmFN	782	260	TCA→TUA	S→L	C	U	0.981
ccmFN	794	264	CCA→CUA	P→L	C	U	0.999
ccmFN	809	269	TCA→TUA	S→L	C	U	0.991
ccmFN	958	319	CGC→UGC	R→C	C	U	0.994
ccmFN	999	333	CTC→CTU	L→L	C	U	0.921
ccmFN	1276	425	CGG→UGG	R→W	C	U	0.992
ccmFN	1304	434	CCA→CUA	P→L	C	U	1
ccmFN	1321	440	CAT→UAT	H→Y	C	U	1
ccmFN	1336	445	CGG→UGG	R→W	C	U	0.999
ccmFN	1354	451	CGG→UGG	R→W	C	U	0.999
ccmFN	1387	462	CGG→UGG	R→W	C	U	1
ccmFN	1405	468	CGT→UGT	R→C	C	U	0.996
ccmFN	1448	482	TCG→TUG	S→L	C	U	0.999
ccmFN	1468	489	CTT→UTT	L→F	C	U	0.998
ccmFN	1472	490	CCA→CUA	P→L	C	U	0.995
ccmFN	1484	494	TCA→TUA	S→L	C	U	1
ccmFN	1493	497	TCT→TUT	S→F	C	U	0.998
ccmFN	1519	506	CCC→UCC	P→S	C	U	0.999
cob	118	39	CCG→UCG	P→S	C	U	0.999
cob	286	95	CTC→UTC	L→F	C	U	1
cob	298	99	CAC→UAC	H→Y	C	U	0.996
cob	358	119	CGG→UGG	R→W	C	U	0.997
cob	419	139	CCA→CUA	P→L	C	U	1
cob	680	226	TCT→TUT	S→F	C	U	0.987
cob	737	245	TCT→TUT	S→F	C	U	0.972
cob	808	269	CCC→UCC	P→S	C	U	1
cob	853	284	CAT→UAT	H→Y	C	U	0.999
cob	908	302	CCA→CUA	P→L	C	U	0.998
cob	1018	339	CGC→UGC	R→C	C	U	0.947
cob	1087	362	CCT→UCT	P→S	C	U	0.965
cob	1127	375	CCG→CUG	P→L	C	U	0.954
cox1	11	3	CCG→CUG	P→L	C	U	0.997
cox1	15	5	GTC→GTU	V→V	C	U	0.961
cox1	242	80	TCT→TUT	S→F	C	U	0.998
cox1	254	84	TCT→TUT	S→F	C	U	1
cox1	352	117	CCA→UCA	P→S	C	U	0.998
cox1	443	147	TCA→TUA	S→L	C	U	0.993
cox1	452	150	TCT→TUT	S→F	C	U	0.999
cox1	458	152	CCT→CUT	P→L	C	U	1
cox1	515	171	TCC→TUC	S→F	C	U	1
cox1	551	183	TCA→TUA	S→L	C	U	1
cox1	590	196	CCA→CUA	P→L	C	U	0.999
cox1	668	222	TCT→TUT	S→F	C	U	0.999
cox1	715	238	CGG→UGG	R→W	C	U	0.987
cox1	746	248	CCC→CUC	P→L	C	U	0.998
cox1	761	253	TCC→TUC	S→F	C	U	0.996
cox1	1079	359	CCG→CUG	P→L	C	U	1
cox1	1186	395	CAC→UAC	H→Y	C	U	1
cox1	1274	424	CCG→CUG	P→L	C	U	0.998
cox1	1405	468	CGT→UGT	R→C	C	U	1
cox1	1433	477	TCA→TUA	S→L	C	U	0.997
cox1	1446	482	AAC→AAU	N→N	C	U	0.982
cox1	1489	496	CCA→UCA	P→S	C	U	0.986
cox1	1499	499	CCG→CUG	P→L	C	U	0.988
cox2	74	24	TCT→TUT	S→F	C	U	1
cox2	164	54	TCA→TUA	S→L	C	U	0.985
cox2	166	55	CGG→UGG	R→W	C	U	0.998
cox2	256	85	CGG→UGG	R→W	C	U	0.998
cox2	281	93	CCG→CUG	P→L	C	U	0.998
cox2	382	127	CGG→UGG	R→W	C	U	0.999
cox2	446	148	ACG→AUG	T→M	C	U	0.999
cox2	464	154	CCA→CUA	P→L	C	U	0.991
cox2	479	159	TCA→TUA	S→L	C	U	0.998
cox2	547	182	CCT→UCT	P→S	C	U	0.999
cox2	560	186	CCT→CUT	P→L	C	U	0.996
cox2	584	194	TCA→TUA	S→L	C	U	0.999
cox2	635	211	TCG→TUG	S→L	C	U	0.999
cox2	701	233	ACG→AUG	T→M	C	U	1
cox2	745	248	CGG→UGG	R→W	C	U	0.999
cox3	112	37	CCA→UCA	P→S	C	U	1
cox3	245	81	CCT→CUT	P→L	C	U	1
cox3	289	96	CTT→UTT	L→F	C	U	1
cox3	311	103	TCT→TUT	S→F	C	U	0.994
cox3	314	104	TCT→TUT	S→F	C	U	0.999
cox3	422	140	CCT→CUT	P→L	C	U	0.996
cox3	512	170	TCA→TUA	S→L	C	U	1
cox3	566	188	TCC→TUC	S→F	C	U	1
cox3	754	251	CGG→UGG	R→W	C	U	1
cox3	764	254	CCA→CUA	P→L	C	U	1
matR	235	78	CCC→UCC	P→S	C	U	0.98
matR	326	108	CCA→CUA	P→L	C	U	0.983
matR	413	137	TCG→TUG	S→L	C	U	0.973
matR	1679	559	TCC→TUC	S→F	C	U	0.996
matR	1700	566	CCT→CUT	P→L	C	U	0.999
matR	1720	573	CGC→UGC	R→C	C	U	1
matR	1734	578	TAC→TAU	Y→Y	C	U	0.996
matR	1756	585	CAC→UAC	H→Y	C	U	0.995
matR	1787	595	CCG→CUG	P→L	C	U	0.997
matR	1826	608	CCA→CUA	P→L	C	U	0.998
matR	1844	614	TCA→TUA	S→L	C	U	0.999
mttB	16	5	CAT→UAT	H→Y	C	U	0.982
mttB	25	8	CCG→UCG	P→S	C	U	0.989
mttB	26	8	CCG→CUG	P→L	C	U	0.995
mttB	64	21	CGG→UGG	R→W	C	U	0.992
mttB	100	33	CGT→UGT	R→C	C	U	0.999
mttB	112	37	CCG→UCG	P→S	C	U	0.998
mttB	128	42	TCT→TUT	S→F	C	U	0.996
mttB	131	43	CCA→CUA	P→L	C	U	0.985
mttB	178	59	CGT→UGT	R→C	C	U	0.998
mttB	188	62	TCA→TUA	S→L	C	U	1
mttB	200	66	TCC→TUC	S→F	C	U	1
mttB	202	67	CCG→UCG	P→S	C	U	0.999
mttB	223	74	CCA→UCA	P→S	C	U	1
mttB	262	87	CAT→UAT	H→Y	C	U	0.991
mttB	328	109	CTC→UTC	L→F	C	U	0.984
mttB	331	110	CAT→UAT	H→Y	C	U	0.983
mttB	344	114	TCT→TUT	S→F	C	U	0.933
mttB	346	115	CGC→UGC	R→C	C	U	0.999
mttB	373	124	CTT→UTT	L→F	C	U	0.929
mttB	376	125	CCC→UCC	P→S	C	U	0.987
mttB	379	126	CGG→UGG	R→W	C	U	0.945
mttB	407	135	CCA→CUA	P→L	C	U	0.998
mttB	459	153	CCC→CCU	P→P	C	U	0.998
mttB	472	157	CAT→UAT	H→Y	C	U	0.998
mttB	497	165	TCG→TUG	S→L	C	U	0.994
mttB	505	168	CCA→UCA	P→S	C	U	0.978
mttB	541	180	CGT→UGT	R→C	C	U	0.997
mttB	548	182	CCA→CUA	P→L	C	U	0.999
mttB	554	184	CCA→CUA	P→L	C	U	0.998
mttB	578	192	TCC→TUC	S→F	C	U	0.997
mttB	610	203	CCG→UCG	P→S	C	U	0.996
mttB	660	220	ATC→ATU	I→I	C	U	0.997
mttB	667	222	CGT→UGT	R→C	C	U	0.997
mttB	672	224	TTC→TTU	F→F	C	U	0.932
mttB	704	234	TCT→TUT	S→F	C	U	1
mttB	713	237	TCG→TUG	S→L	C	U	0.998
nad1	265	88	CGG→UGG	R→W	C	U	0.999
nad1	307	102	CCG→UCG	P→S	C	U	0.995
nad1	308	102	CCG→CUG	P→L	C	U	1
nad1	376	125	CGG→UGG	R→W	C	U	0.999
nad1	436	145	CCT→UCT	P→S	C	U	0.998
nad1	490	163	CCC→UCC	P→S	C	U	0.997
nad1	492	164	CCC→CCU	P→P	C	U	0.989
nad1	493	164	CGT→UGT	R→C	C	U	0.995
nad1	500	166	TCG→TUG	S→L	C	U	1
nad1	536	178	TCT→TUT	S→F	C	U	0.998
nad1	580	193	CGT→UGT	R→C	C	U	0.992
nad1	635	211	TCA→TUA	S→L	C	U	0.999
nad1	674	224	TCT→TUT	S→F	C	U	1
nad1	683	227	TCT→TUT	S→F	C	U	0.999
nad1	725	241	CCA→CUA	P→L	C	U	0.995
nad1	734	244	TCG→TUG	S→L	C	U	0.958
nad1	755	251	CCG→CUG	P→L	C	U	0.913
nad1	779	259	TCC→TUC	S→F	C	U	0.998
nad1	802	267	CGG→UGG	R→W	C	U	1
nad1	830	276	CCT→CUT	P→L	C	U	0.996
nad1	898	299	CGG→UGG	R→W	C	U	0.999
nad1	928	309	CGG→UGG	R→W	C	U	0.999
nad1	937	312	CCC→UCC	P→S	C	U	0.988
nad2	26	8	TCC→TUC	S→F	C	U	0.996
nad2	223	74	CTT→UTT	L→F	C	U	0.997
nad2	308	102	TCT→TUT	S→F	C	U	0.997
nad2	311	103	TCC→TUC	S→F	C	U	0.999
nad2	335	111	TCT→TUT	S→F	C	U	1
nad2	341	113	TCC→TUC	S→F	C	U	0.999
nad2	356	118	CCA→CUA	P→L	C	U	0.996
nad2	361	120	CCT→UCT	P→S	C	U	0.999
nad2	367	122	CGC→UGC	R→C	C	U	0.989
nad2	401	133	TCA→TUA	S→L	C	U	0.998
nad2	428	142	CCT→CUT	P→L	C	U	0.999
nad2	497	165	TCG→TUG	S→L	C	U	0.997
nad2	523	174	CCC→UCC	P→S	C	U	0.997
nad2	662	220	TCT→TUT	S→F	C	U	0.999
nad2	677	225	TCC→TUC	S→F	C	U	0.997
nad2	788	262	TCT→TUT	S→F	C	U	1
nad2	800	266	TCA→TUA	S→L	C	U	0.986
nad2	809	269	TCT→TUT	S→F	C	U	0.999
nad2	928	309	CAT→UAT	H→Y	C	U	0.995
nad2	958	319	CGT→UGT	R→C	C	U	0.998
nad2	962	320	ACT→AUT	T→I	C	U	0.985
nad2	1028	342	TCA→TUA	S→L	C	U	0.999
nad2	1058	352	TCA→TUA	S→L	C	U	0.997
nad2	1127	375	TCG→TUG	S→L	C	U	0.999
nad2	1246	415	CCA→UCA	P→S	C	U	0.999
nad2	1276	425	CGT→UGT	R→C	C	U	1
nad2	1298	432	GCG→GUG	A→V	C	U	1
nad2	1400	466	TCA→TUA	S→L	C	U	0.964
nad2	1408	469	CCA→UCA	P→S	C	U	0.976
nad2	1409	469	CCA→CUA	P→L	C	U	0.991
nad2	1416	472	CCC→CCU	P→P	C	U	0.976
nad2	1457	485	TCA→TUA	S→L	C	U	0.997
nad3	5	1	TCA→TUA	S→L	C	U	0.966
nad3	44	14	CCG→CUG	P→L	C	U	1
nad3	62	20	CCA→CUA	P→L	C	U	0.998
nad3	208	69	CCT→UCT	P→S	C	U	0.998
nad3	209	69	CCT→CUT	P→L	C	U	0.996
nad3	215	71	CCG→CUG	P→L	C	U	0.992
nad3	230	76	TCC→TUC	S→F	C	U	0.999
nad3	247	82	CCT→UCT	P→S	C	U	0.996
nad3	266	88	CCG→CUG	P→L	C	U	1
nad3	275	91	TCT→TUT	S→F	C	U	0.998
nad3	317	105	TCT→TUT	S→F	C	U	1
nad3	344	114	TCG→TUG	S→L	C	U	0.999
nad3	349	116	CGG→UGG	R→W	C	U	0.999
nad4	29	9	TCT→TUT	S→F	C	U	1
nad4	44	14	CCT→CUT	P→L	C	U	0.999
nad4	74	24	ACT→AUT	T→I	C	U	0.997
nad4	77	25	CCT→CUT	P→L	C	U	0.999
nad4	107	35	CCG→CUG	P→L	C	U	0.999
nad4	154	51	CCC→UCC	P→S	C	U	1
nad4	158	52	CCT→CUT	P→L	C	U	0.997
nad4	166	55	CGG→UGG	R→W	C	U	0.992
nad4	197	65	TCT→TUT	S→F	C	U	0.998
nad4	317	105	TCA→TUA	S→L	C	U	0.999
nad4	362	120	ACA→AUA	T→I	C	U	0.999
nad4	368	122	TCT→TUT	S→F	C	U	0.996
nad4	376	125	CGT→UGT	R→C	C	U	0.995
nad4	403	134	CGC→UGC	R→C	C	U	0.999
nad4	416	138	CCT→CUT	P→L	C	U	0.997
nad4	436	145	CCC→UCC	P→S	C	U	0.999
nad4	437	145	CCC→CUC	P→L	C	U	0.987
nad4	449	149	CCA→CUA	P→L	C	U	0.995
nad4	608	202	TCA→TUA	S→L	C	U	0.999
nad4	659	219	TCT→TUT	S→F	C	U	0.999
nad4	710	236	TCA→TUA	S→L	C	U	1
nad4	767	255	CCT→CUT	P→L	C	U	0.999
nad4	836	278	TCC→TUC	S→F	C	U	0.99
nad4	887	295	TCG→TUG	S→L	C	U	1
nad4	934	311	CCA→UCA	P→S	C	U	0.999
nad4	977	325	CCG→CUG	P→L	C	U	1
nad4	1006	335	CCA→UCA	P→S	C	U	0.986
nad4	1007	335	CCA→CUA	P→L	C	U	0.992
nad4	1010	336	CCG→CUG	P→L	C	U	1
nad4	1016	338	TCA→TUA	S→L	C	U	1
nad4	1101	367	TAC→TAU	Y→Y	C	U	0.906
nad4	1109	369	TCA→TUA	S→L	C	U	0.999
nad4	1129	376	CTC→UTC	L→F	C	U	0.995
nad4	1132	377	CCT→UCT	P→S	C	U	1
nad4	1148	382	TCT→TUT	S→F	C	U	0.996
nad4	1151	383	TCC→TUC	S→F	C	U	0.992
nad4	1172	390	TCA→TUA	S→L	C	U	1
nad4	1307	435	GCG→GUG	A→V	C	U	0.992
nad4	1355	451	CCA→CUA	P→L	C	U	0.995
nad4	1373	457	TCC→TUC	S→F	C	U	0.998
nad4	1405	468	CGG→UGG	R→W	C	U	0.999
nad4	1417	472	CAC→UAC	H→Y	C	U	0.999
nad4	1433	477	CCG→CUG	P→L	C	U	0.999
nad4	1438	479	CGC→UGC	R→C	C	U	0.991
nad4L	2	0	ACG→AUG	T→M	C	U	0.914
nad4L	41	13	TCT→TUT	S→F	C	U	0.993
nad4L	47	15	TCA→TUA	S→L	C	U	0.999
nad4L	55	18	CGG→UGG	R→W	C	U	0.992
nad4L	86	28	CCT→CUT	P→L	C	U	0.967
nad4L	95	31	TCA→TUA	S→L	C	U	1
nad4L	100	33	CCA→UCA	P→S	C	U	0.999
nad4L	110	36	TCA→TUA	S→L	C	U	0.998
nad4L	131	43	TCG→TUG	S→L	C	U	1
nad4L	158	52	TCG→TUG	S→L	C	U	0.997
nad4L	179	59	TCA→TUA	S→L	C	U	1
nad4L	188	62	TCA→TUA	S→L	C	U	0.997
nad4L	196	65	CCA→UCA	P→S	C	U	0.905
nad4L	197	65	CCA→CUA	P→L	C	U	0.992
nad4L	281	93	TCT→TUT	S→F	C	U	0.999
nad5	155	51	CCG→CUG	P→L	C	U	1
nad5	242	80	CCG→CUG	P→L	C	U	1
nad5	272	90	TCC→TUC	S→F	C	U	0.999
nad5	358	119	CCT→UCT	P→S	C	U	0.994
nad5	359	119	CCT→CUT	P→L	C	U	0.999
nad5	374	124	CCA→CUA	P→L	C	U	0.996
nad5	398	132	TCT→TUT	S→F	C	U	1
nad5	539	179	CCT→CUT	P→L	C	U	0.999
nad5	548	182	TCG→TUG	S→L	C	U	0.999
nad5	598	199	CGT→UGT	R→C	C	U	0.999
nad5	608	202	GCC→GUC	A→V	C	U	0.993
nad5	629	209	TCT→TUT	S→F	C	U	0.999
nad5	631	210	CGC→UGC	R→C	C	U	0.996
nad5	676	225	CTT→UTT	L→F	C	U	1
nad5	713	237	TCG→TUG	S→L	C	U	0.999
nad5	725	241	TCA→TUA	S→L	C	U	1
nad5	835	278	CCG→UCG	P→S	C	U	1
nad5	1184	394	CCA→CUA	P→L	C	U	1
nad5	1490	496	CCC→CUC	P→L	C	U	0.999
nad5	1550	516	ACC→AUC	T→I	C	U	0.995
nad5	1568	522	CCG→CUG	P→L	C	U	1
nad5	1580	526	TCA→TUA	S→L	C	U	0.998
nad5	1589	529	TCT→TUT	S→F	C	U	0.985
nad5	1610	536	CCC→CUC	P→L	C	U	0.999
nad5	1895	631	TCA→TUA	S→L	C	U	0.998
nad5	1916	638	TCT→TUT	S→F	C	U	0.999
nad5	1918	639	CGT→UGT	R→C	C	U	0.999
nad5	1958	652	TCG→TUG	S→L	C	U	0.991
nad6	83	27	TCG→TUG	S→L	C	U	1
nad6	89	29	TCC→TUC	S→F	C	U	0.972
nad6	95	31	CCA→CUA	P→L	C	U	0.987
nad6	103	34	CGC→UGC	R→C	C	U	0.994
nad6	161	53	CCA→CUA	P→L	C	U	0.996
nad6	191	63	TCA→TUA	S→L	C	U	0.999
nad6	446	148	TCC→TUC	S→F	C	U	0.999
nad6	447	149	TCC→TCU	S→S	C	U	0.909
nad6	463	154	CCT→UCT	P→S	C	U	0.996
nad6	569	189	TCT→TUT	S→F	C	U	1
nad7	38	12	TCG→TUG	S→L	C	U	0.999
nad7	45	15	TTC→TTU	F→F	C	U	0.997
nad7	77	25	TCA→TUA	S→L	C	U	0.999
nad7	137	45	TCA→TUA	S→L	C	U	0.999
nad7	200	66	TCT→TUT	S→F	C	U	0.995
nad7	224	74	ACG→AUG	T→M	C	U	1
nad7	244	81	CAT→UAT	H→Y	C	U	0.999
nad7	251	83	TCA→TUA	S→L	C	U	0.993
nad7	316	105	CGT→UGT	R→C	C	U	0.997
nad7	335	111	TCA→TUA	S→L	C	U	0.999
nad7	344	114	TCA→TUA	S→L	C	U	0.999
nad7	383	127	TCA→TUA	S→L	C	U	1
nad7	533	177	TCC→TUC	S→F	C	U	0.998
nad7	578	192	TCA→TUA	S→L	C	U	1
nad7	679	226	CCA→UCA	P→S	C	U	0.987
nad7	698	232	TCG→TUG	S→L	C	U	1
nad7	724	241	CAT→UAT	H→Y	C	U	1
nad7	739	246	CCT→UCT	P→S	C	U	0.999
nad7	740	246	CCT→CUT	P→L	C	U	0.999
nad7	769	256	CGC→UGC	R→C	C	U	1
nad7	836	278	CCT→CUT	P→L	C	U	0.998
nad7	926	308	TCA→TUA	S→L	C	U	0.999
nad7	944	314	CCT→CUT	P→L	C	U	0.999
nad7	973	324	CCT→UCT	P→S	C	U	0.999
nad7	1050	350	CCC→CCU	P→P	C	U	0.966
nad7	1057	352	CGT→UGT	R→C	C	U	0.998
nad7	1079	359	TCT→TUT	S→F	C	U	0.999
nad7	1088	362	TCA→TUA	S→L	C	U	0.996
nad7	1103	367	TCT→TUT	S→F	C	U	0.999
nad7	1124	374	CCA→CUA	P→L	C	U	1
nad7	1137	379	GTC→GTU	V→V	C	U	0.941
nad7	1166	388	TCT→TUT	S→F	C	U	1
nad9	92	30	TCT→TUT	S→F	C	U	0.996
nad9	113	37	CCA→CUA	P→L	C	U	0.994
nad9	190	63	CAT→UAT	H→Y	C	U	1
nad9	298	99	CCG→UCG	P→S	C	U	0.996
nad9	328	109	CGG→UGG	R→W	C	U	1
nad9	368	122	TCC→TUC	S→F	C	U	1
nad9	398	132	TCA→TUA	S→L	C	U	0.998
nad9	439	146	CTT→UTT	L→F	C	U	0.998
nad9	539	179	TCT→TUT	S→F	C	U	0.997
rpl10	101	33	TCA→TUA	S→L	C	U	0.989
rpl10	134	44	CCA→CUA	P→L	C	U	0.994
rpl16	102	34	GGC→GGU	G→G	C	U	0.935
rpl16	104	34	ACT→AUT	T→I	C	U	1
rpl16	232	77	CTC→UTC	L→F	C	U	0.995
rpl16	321	107	TCC→TCU	S→S	C	U	0.903
rpl16	401	133	CCA→CUA	P→L	C	U	0.997
rpl16	407	135	TCG→TUG	S→L	C	U	0.992
rpl5	62	20	CCG→CUG	P→L	C	U	0.982
rpl5	95	31	TCG→TUG	S→L	C	U	0.995
rpl5	175	58	CGC→UGC	R→C	C	U	0.993
rpl5	512	170	CCA→CUA	P→L	C	U	0.991
rps1	158	52	CCT→CUT	P→L	C	U	0.981
rps10	62	20	ACG→AUG	T→M	C	U	0.997
rps10	76	25	CGC→UGC	R→C	C	U	0.949
rps12	71	23	TCG→TUG	S→L	C	U	1
rps12	100	33	CGC→UGC	R→C	C	U	0.997
rps12	104	34	CCG→CUG	P→L	C	U	0.981
rps12	112	37	CCA→UCA	P→S	C	U	0.987
rps12	146	48	CCA→CUA	P→L	C	U	1
rps12	196	65	CAC→UAC	H→Y	C	U	0.999
rps12	269	89	TCG→TUG	S→L	C	U	0.997
rps12	284	94	TCC→TUC	S→F	C	U	1
rps13	26	8	TCA→TUA	S→L	C	U	0.999
rps13	56	18	TCA→TUA	S→L	C	U	0.924
rps13	100	33	CGT→UGT	R→C	C	U	0.964
rps13	243	81	TTC→TTU	F→F	C	U	0.995
rps3	64	21	CGG→UGG	R→W	C	U	1
rps3	69	23	TTC→TTU	F→F	C	U	0.984
rps3	92	30	TCA→TUA	S→L	C	U	0.999
rps3	518	172	TCA→TUA	S→L	C	U	0.991
rps3	899	299	TCG→TUG	S→L	C	U	0.932
rps3	1040	346	CCA→CUA	P→L	C	U	0.999
rps3	1364	454	CCG→CUG	P→L	C	U	1
rps3	1391	463	CCG→CUG	P→L	C	U	1
rps3	1555	518	CGT→UGT	R→C	C	U	0.997
rps3	1588	529	CCT→UCT	P→S	C	U	0.998
rps3	1619	539	TCA→TUA	S→L	C	U	1
rps4	50	16	TCA→TUA	S→L	C	U	0.97
rps4	176	58	TCA→TUA	S→L	C	U	0.996
rps4	196	65	CCC→UCC	P→S	C	U	0.999
rps4	205	68	CAT→UAT	H→Y	C	U	0.988
rps4	278	92	CCA→CUA	P→L	C	U	0.99
rps4	290	96	TCG→TUG	S→L	C	U	0.997
rps4	302	100	CCG→CUG	P→L	C	U	0.999
rps4	319	106	CGT→UGT	R→C	C	U	0.984
rps4	347	115	CCG→CUG	P→L	C	U	0.989
rps4	446	148	GCG→GUG	A→V	C	U	0.929
rps4	494	164	TCA→TUA	S→L	C	U	0.995
rps4	932	310	TCT→TUT	S→F	C	U	0.956
rps4	963	321	TCC→TCU	S→S	C	U	0.925
rps4	1028	342	TCG→TUG	S→L	C	U	0.988
rps4	1039	346	CAT→UAT	H→Y	C	U	0.985
rps4	1064	354	TCT→TUT	S→F	C	U	0.997
rps4	1115	371	CCA→CUA	P→L	C	U	0.993
rps4	1129	376	CGG→UGG	R→W	C	U	0.996
rps7	116	38	CCA→CUA	P→L	C	U	0.992
rps7	332	110	TCA→TUA	S→L	C	U	0.982
sdh4	29	9	TCG→TUG	S→L	C	U	1
sdh4	39	13	CCC→CCU	P→P	C	U	1
