# Supplementary material for: Structural and evolutionary analyses of the mitochondrial genome of Spuriopimpinella brachycarpa
Source: Front Plant Sci. 2024 Nov 26;15:1492723. doi: 10.3389/fpls.2024.1492723 (PMC11628310; doi:10.3389/fpls.2024.1492723)
Supplement: Supplementary Table 4 — RSCU values in S. brachycarpa and four related species. [file Table4.xlsx]

## Sheet: Sheet1
RSCU values of the S. brachycarpa and four related species
Amino	Codon	S. brachycarpa	C. cyminum	D. carota	O. linearis	O. thomsonii
Trp	UGG	1	1	1	1	1
Gly	GGU	1.36	1.23	1.26	1.28	1.27
Arg	AGG	0.71	0.7	0.74	0.68	0.67
Arg	CGA	1.31	1.28	1.27	1.34	1.34
Cys	UGU	1.23	1.24	1.22	1.31	1.31
Gly	GGG	0.65	0.81	0.79	0.77	0.75
Arg	AGA	1.13	1.38	1.34	1.27	1.32
Arg	CGC	0.66	0.67	0.66	0.73	0.71
Cys	UGC	0.77	0.76	0.78	0.69	0.69
Gly	GGA	1.43	1.39	1.4	1.42	1.45
Ser	AGC	0.63	0.67	0.65	0.65	0.64
Arg	CGG	0.95	0.76	0.74	0.77	0.75
Tyr	UAC	0.5	0.51	0.48	0.49	0.49
Gly	GGC	0.56	0.57	0.55	0.53	0.53
Ser	AGU	1.05	1.04	1.06	1.04	1.07
Arg	CGU	1.25	1.22	1.25	1.21	1.2
Tyr	UAU	1.5	1.49	1.52	1.51	1.51
Asp	GAU	1.32	1.3	1.31	1.35	1.33
Lys	AAG	0.81	0.74	0.75	0.79	0.77
Gin	CAA	1.51	1.5	1.49	1.5	1.51
Ser	UCU	1.42	1.41	1.45	1.38	1.37
Asp	GAC	0.68	0.7	0.69	0.65	0.67
Lys	AAA	1.19	1.26	1.25	1.21	1.23
Gin	CAG	0.49	0.5	0.51	0.5	0.49
Ser	UCG	0.77	0.77	0.78	0.81	0.78
Glu	GAA	1.32	1.35	1.36	1.34	1.35
Asn	AAC	0.62	0.69	0.68	0.63	0.64
His	CAU	1.54	1.52	1.52	1.55	1.55
Ser	UCA	1.2	1.15	1.16	1.23	1.22
Glu	GAG	0.68	0.65	0.64	0.66	0.65
Asn	AAU	1.38	1.31	1.32	1.37	1.36
His	CAC	0.46	0.48	0.48	0.45	0.45
Ser	UCC	0.93	0.95	0.89	0.89	0.9
Ala	GCA	0.99	0.95	0.98	1	1.01
Thr	ACC	0.97	1.06	1.04	1.06	1.09
Pro	CCU	1.38	1.37	1.35	1.43	1.43
Phe	UUU	1.14	1.13	1.14	1.14	1.13
Ala	GCC	0.96	0.98	0.95	0.93	0.93
Thr	ACA	0.98	1.06	1.02	0.99	0.98
Pro	CCG	0.62	0.67	0.65	0.65	0.67
Phe	UUC	0.86	0.87	0.86	0.86	0.87
Ala	GCG	0.46	0.5	0.51	0.48	0.46
Thr	ACG	0.63	0.58	0.59	0.57	0.56
Pro	CCA	1.15	1.13	1.17	1.14	1.16
Leu	UUG	1.19	1.22	1.19	1.22	1.22
Ala	GCU	1.59	1.57	1.56	1.6	1.6
Thr	ACU	1.42	1.3	1.35	1.39	1.38
Pro	CCC	0.85	0.84	0.83	0.78	0.75
Leu	UUA	1.43	1.47	1.49	1.44	1.47
Val	GUA	1.28	1.18	1.2	1.22	1.19
Ile	AUC	0.82	0.82	0.83	0.78	0.8
Leu	CUA	0.94	0.87	0.89	0.88	0.9
Ter	UAG	0.52	0.6	0.56	0.69	0.56
Val	GUC	0.7	0.73	0.71	0.79	0.79
Ile	AUA	0.85	0.88	0.88	0.87	0.86
Leu	CUU	1.25	1.24	1.25	1.26	1.26
Ter	UGA	0.91	0.77	0.84	0.81	1
Val	GUG	0.78	0.91	0.88	0.84	0.87
Ile	AUU	1.33	1.3	1.29	1.34	1.34
Leu	CUC	0.64	0.63	0.6	0.66	0.62
Ter	UAA	1.57	1.63	1.59	1.5	1.44
Val	GUU	1.23	1.18	1.21	1.15	1.15
Met	AUG	1	1	1	1	1
Leu	CUG	0.54	0.57	0.58	0.54	0.54
