# Supplementary material for: Structural and evolutionary analyses of the mitochondrial genome of Spuriopimpinella brachycarpa
Source: Front Plant Sci. 2024 Nov 26;15:1492723. doi: 10.3389/fpls.2024.1492723 (PMC11628310; doi:10.3389/fpls.2024.1492723)
Supplement: Supplementary Table 5 — Number of conserved genes among 33 species. [file Table5.xlsx]

## Sheet: gene proportion in phylogeny
MW477237.1	atp1(+)	atp4(+)	atp6(+)	atp8(+)	atp9(+)	ccmB(+)	ccmC(+)	ccmFC(+)	ccmFN(+)	cob(+)	cox1(+)	cox2(+)	cox3(+)	matR(+)	mttB(+)	nad1(+)	nad2(+)	nad3(+)	nad4(+)	nad4L(+)	nad5(+)	nad6(+)	nad7(+)	nad9(+)	rpl10(+)	rpl16(+)	rpl5(+)	rps12(+)	rps13(+)
MZ328723.1	atp1(+)	atp4(+)	atp6(+)	atp8(+)	atp9(+)	ccmB(+)	ccmC(+)	ccmFC(+)	ccmFN(+)	cob(+)	cox1(+)	cox2(+)	cox3(+)	matR(+)	mttB(+)	nad1(+)	nad2(+)	nad3(+)	nad4(+)	nad4L(+)	nad5(+)	nad6(+)	nad7(+)	nad9(+)	rpl10(+)	rpl16(+)	rpl5(+)	rps12(+)	rps13(+)
MZ389476.1	atp1(+)	atp4(+)	atp6(+)	atp8(+)	atp9(+)	ccmB(+)	ccmC(+)	ccmFC(+)	ccmFN(+)	cob(+)	cox1(+)	cox2(+)	cox3(+)	matR(+)	mttB(+)	nad1(+)	nad2(+)	nad3(+)	nad4(+)	nad4L(+)	nad5(+)	nad6(+)	nad7(+)	nad9(+)	rpl10(+)	rpl16(+)	rpl5(-)	rps12(+)	rps13(-)
MZ504724.1	atp1(+)	atp4(+)	atp6(+)	atp8(+)	atp9(+)	ccmB(+)	ccmC(+)	ccmFC(+)	ccmFN(+)	cob(+)	cox1(+)	cox2(+)	cox3(+)	matR(+)	mttB(+)	nad1(+)	nad2(+)	nad3(+)	nad4(+)	nad4L(+)	nad5(+)	nad6(+)	nad7(+)	nad9(+)	rpl10(+)	rpl16(+)	rpl5(+)	rps12(+)	rps13(+)
MZ826156	atp1(+)	atp4(+)	atp6(+)	atp8(+)	atp9(-)	ccmB(-)	ccmC(+)	ccmFC(+)	ccmFN(+)	cob(+)	cox1(+)	cox2(+)	cox3(+)	matR(+)	mttB(+)	nad1(-)	nad2(+)	nad3(+)	nad4(+)	nad4L(+)	nad5(+)	nad6(+)	nad7(+)	nad9(+)	rpl10(+)	rpl16(+)	rpl5(+)	rps12(+)	rps13(+)
MZ826160.1	atp1(+)	atp4(+)	atp6(+)	atp8(+)	atp9(+)	ccmB(+)	ccmC(+)	ccmFC(+)	ccmFN(+)	cob(+)	cox1(+)	cox2(+)	cox3(+)	matR(+)	mttB(+)	nad1(+)	nad2(+)	nad3(+)	nad4(+)	nad4L(+)	nad5(+)	nad6(+)	nad7(+)	nad9(+)	rpl10(+)	rpl16(+)	rpl5(-)	rps12(+)	rps13(-)
MZ826164.1	atp1(+)	atp4(+)	atp6(+)	atp8(+)	atp9(+)	ccmB(+)	ccmC(+)	ccmFC(+)	ccmFN(+)	cob(+)	cox1(+)	cox2(+)	cox3(+)	matR(+)	mttB(+)	nad1(+)	nad2(+)	nad3(+)	nad4(+)	nad4L(+)	nad5(+)	nad6(+)	nad7(+)	nad9(+)	rpl10(+)	rpl16(+)	rpl5(-)	rps12(+)	rps13(-)
NC_023337.1	atp1(+)	atp4(+)	atp6(+)	atp8(+)	atp9(+)	ccmB(+)	ccmC(+)	ccmFC(+)	ccmFN(+)	cob(+)	cox1(+)	cox2(-)	cox3(+)	matR(+)	mttB(-)	nad1(-)	nad2(-)	nad3(+)	nad4(-)	nad4L(+)	nad5(+)	nad6(+)	nad7(-)	nad9(+)	rpl10(+)	rpl16(+)	rpl5(+)	rps12(+)	rps13(+)
NC_034354.1	atp1(+)	atp4(+)	atp6(+)	atp8(+)	atp9(+)	ccmB(+)	ccmC(+)	ccmFC(+)	ccmFN(+)	cob(+)	cox1(+)	cox2(+)	cox3(+)	matR(+)	mttB(+)	nad1(+)	nad2(+)	nad3(+)	nad4(+)	nad4L(+)	nad5(+)	nad6(+)	nad7(+)	nad9(+)	rpl10(+)	rpl16(+)	rpl5(+)	rps12(+)	rps13(+)
NC_039757.1	atp1(+)	atp4(+)	atp6(+)	atp8(+)	atp9(+)	ccmB(+)	ccmC(+)	ccmFC(+)	ccmFN(+)	cob(+)	cox1(+)	cox2(+)	cox3(+)	matR(+)	mttB(+)	nad1(+)	nad2(+)	nad3(+)	nad4(+)	nad4L(+)	nad5(+)	nad6(+)	nad7(+)	nad9(+)	rpl10(+)	rpl16(-)	rpl5(+)	rps12(+)	rps13(+)
NC_042756.1	atp1(+)	atp4(+)	atp6(+)	atp8(+)	atp9(+)	ccmB(+)	ccmC(+)	ccmFC(+)	ccmFN(+)	cob(+)	cox1(+)	cox2(+)	cox3(+)	matR(+)	mttB(+)	nad1(+)	nad2(+)	nad3(+)	nad4(+)	nad4L(+)	nad5(+)	nad6(+)	nad7(+)	nad9(+)	rpl10(+)	rpl16(+)	rpl5(+)	rps12(+)	rps13(+)
NC_045078.1	atp1(+)	atp4(+)	atp6(+)	atp8(+)	atp9(+)	ccmB(+)	ccmC(+)	ccmFC(+)	ccmFN(+)	cob(+)	cox1(+)	cox2(+)	cox3(+)	matR(+)	mttB(+)	nad1(+)	nad2(+)	nad3(+)	nad4(+)	nad4L(+)	nad5(+)	nad6(+)	nad7(+)	nad9(+)	rpl10(+)	rpl16(-)	rpl5(+)	rps12(+)	rps13(+)
NC_053927.1	atp1(+)	atp4(+)	atp6(+)	atp8(+)	atp9(+)	ccmB(+)	ccmC(+)	ccmFC(+)	ccmFN(+)	cob(+)	cox1(+)	cox2(+)	cox3(+)	matR(+)	mttB(+)	nad1(+)	nad2(+)	nad3(+)	nad4(+)	nad4L(+)	nad5(+)	nad6(+)	nad7(+)	nad9(+)	rpl10(+)	rpl16(-)	rpl5(+)	rps12(-)	rps13(+)
NC_058313.1	atp1(+)	atp4(-)	atp6(+)	atp8(+)	atp9(+)	ccmB(+)	ccmC(+)	ccmFC(+)	ccmFN(+)	cob(+)	cox1(+)	cox2(+)	cox3(+)	matR(+)	mttB(+)	nad1(+)	nad2(+)	nad3(+)	nad4(+)	nad4L(+)	nad5(+)	nad6(+)	nad7(+)	nad9(+)	rpl10(+)	rpl16(+)	rpl5(+)	rps12(+)	rps13(+)
NC_058643.1	atp1(+)	atp4(+)	atp6(+)	atp8(+)	atp9(+)	ccmB(+)	ccmC(+)	ccmFC(+)	ccmFN(+)	cob(+)	cox1(+)	cox2(+)	cox3(+)	matR(+)	mttB(+)	nad1(+)	nad2(+)	nad3(+)	nad4(+)	nad4L(+)	nad5(+)	nad6(+)	nad7(+)	nad9(+)	rpl10(+)	rpl16(-)	rpl5(+)	rps12(+)	rps13(+)
NC_058846.1	atp1(+)	atp4(+)	atp6(+)	atp8(+)	atp9(+)	ccmB(+)	ccmC(+)	ccmFC(+)	ccmFN(+)	cob(+)	cox1(+)	cox2(+)	cox3(+)	matR(+)	mttB(+)	nad1(+)	nad2(+)	nad3(+)	nad4(+)	nad4L(+)	nad5(+)	nad6(+)	nad7(+)	nad9(+)	rpl10(+)	rpl16(-)	rpl5(+)	rps12(+)	rps13(+)
NC_062671.1	atp1(+)	atp4(+)	atp6(+)	atp8(+)	atp9(+)	ccmB(+)	ccmC(+)	ccmFC(+)	ccmFN(+)	cob(+)	cox1(+)	cox2(+)	cox3(+)	matR(+)	mttB(+)	nad1(+)	nad2(+)	nad3(+)	nad4(+)	nad4L(+)	nad5(+)	nad6(+)	nad7(+)	nad9(+)	rpl10(+)	rpl16(-)	rpl5(+)	rps12(+)	rps13(+)
NC_064333.1	atp1(+)	atp4(+)	atp6(+)	atp8(+)	atp9(+)	ccmB(-)	ccmC(+)	ccmFC(+)	ccmFN(+)	cob(+)	cox1(+)	cox2(+)	cox3(+)	matR(+)	mttB(+)	nad1(+)	nad2(+)	nad3(+)	nad4(+)	nad4L(+)	nad5(+)	nad6(+)	nad7(+)	nad9(+)	rpl10(-)	rpl16(+)	rpl5(+)	rps12(+)	rps13(+)
NC_072550.1	atp1(+)	atp4(+)	atp6(+)	atp8(+)	atp9(+)	ccmB(+)	ccmC(+)	ccmFC(+)	ccmFN(+)	cob(+)	cox1(+)	cox2(+)	cox3(+)	matR(+)	mttB(+)	nad1(+)	nad2(+)	nad3(+)	nad4(+)	nad4L(+)	nad5(+)	nad6(+)	nad7(+)	nad9(+)	rpl10(+)	rpl16(+)	rpl5(+)	rps12(+)	rps13(+)
NC_081509.1	atp1(+)	atp4(+)	atp6(+)	atp8(+)	atp9(+)	ccmB(+)	ccmC(+)	ccmFC(+)	ccmFN(+)	cob(+)	cox1(+)	cox2(+)	cox3(+)	matR(+)	mttB(+)	nad1(+)	nad2(+)	nad3(+)	nad4(+)	nad4L(+)	nad5(+)	nad6(+)	nad7(+)	nad9(+)	rpl10(+)	rpl16(+)	rpl5(+)	rps12(+)	rps13(+)
NC_082206.1	atp1(+)	atp4(+)	atp6(+)	atp8(+)	atp9(+)	ccmB(+)	ccmC(+)	ccmFC(+)	ccmFN(+)	cob(+)	cox1(+)	cox2(+)	cox3(+)	matR(+)	mttB(+)	nad1(+)	nad2(+)	nad3(+)	nad4(+)	nad4L(+)	nad5(+)	nad6(+)	nad7(+)	nad9(+)	rpl10(+)	rpl16(+)	rpl5(+)	rps12(+)	rps13(+)
NC_082207.1	atp1(+)	atp4(+)	atp6(+)	atp8(+)	atp9(+)	ccmB(+)	ccmC(+)	ccmFC(+)	ccmFN(+)	cob(+)	cox1(+)	cox2(+)	cox3(+)	matR(+)	mttB(+)	nad1(+)	nad2(+)	nad3(+)	nad4(+)	nad4L(+)	nad5(+)	nad6(+)	nad7(+)	nad9(+)	rpl10(+)	rpl16(+)	rpl5(-)	rps12(+)	rps13(+)
NC_087060.1	atp1(-)	atp4(+)	atp6(+)	atp8(+)	atp9(-)	ccmB(+)	ccmC(+)	ccmFC(+)	ccmFN(+)	cob(+)	cox1(+)	cox2(+)	cox3(+)	matR(+)	mttB(+)	nad1(+)	nad2(+)	nad3(+)	nad4(+)	nad4L(+)	nad5(+)	nad6(+)	nad7(+)	nad9(+)	rpl10(+)	rpl16(+)	rpl5(+)	rps12(+)	rps13(+)
NC_088756.1	atp1(+)	atp4(+)	atp6(+)	atp8(+)	atp9(+)	ccmB(+)	ccmC(+)	ccmFC(+)	ccmFN(+)	cob(+)	cox1(+)	cox2(+)	cox3(+)	matR(+)	mttB(+)	nad1(+)	nad2(+)	nad3(+)	nad4(+)	nad4L(+)	nad5(+)	nad6(+)	nad7(+)	nad9(+)	rpl10(+)	rpl16(+)	rpl5(+)	rps12(+)	rps13(+)
OK166971.1	atp1(+)	atp4(+)	atp6(+)	atp8(+)	atp9(+)	ccmB(+)	ccmC(+)	ccmFC(+)	ccmFN(+)	cob(+)	cox1(+)	cox2(+)	cox3(+)	matR(+)	mttB(+)	nad1(+)	nad2(+)	nad3(+)	nad4(+)	nad4L(+)	nad5(+)	nad6(+)	nad7(+)	nad9(+)	rpl10(+)	rpl16(+)	rpl5(+)	rps12(+)	rps13(+)
OP974166.1	atp1(+)	atp4(+)	atp6(+)	atp8(+)	atp9(+)	ccmB(+)	ccmC(+)	ccmFC(+)	ccmFN(+)	cob(+)	cox1(+)	cox2(+)	cox3(+)	matR(+)	mttB(+)	nad1(+)	nad2(+)	nad3(+)	nad4(+)	nad4L(+)	nad5(+)	nad6(+)	nad7(+)	nad9(+)	rpl10(+)	rpl16(+)	rpl5(+)	rps12(+)	rps13(+)
PP049072.1	atp1(+)	atp4(+)	atp6(+)	atp8(+)	atp9(+)	ccmB(+)	ccmC(+)	ccmFC(+)	ccmFN(+)	cob(+)	cox1(+)	cox2(+)	cox3(+)	matR(+)	mttB(+)	nad1(+)	nad2(+)	nad3(+)	nad4(+)	nad4L(+)	nad5(+)	nad6(+)	nad7(+)	nad9(+)	rpl10(+)	rpl16(+)	rpl5(+)	rps12(+)	rps13(+)
PP693297.1	atp1(+)	atp4(+)	atp6(+)	atp8(+)	atp9(+)	ccmB(+)	ccmC(+)	ccmFC(+)	ccmFN(+)	cob(+)	cox1(+)	cox2(+)	cox3(+)	matR(+)	mttB(+)	nad1(+)	nad2(+)	nad3(+)	nad4(+)	nad4L(+)	nad5(+)	nad6(+)	nad7(+)	nad9(+)	rpl10(+)	rpl16(+)	rpl5(+)	rps12(+)	rps13(+)
PP857826.1	atp1(+)	atp4(+)	atp6(+)	atp8(+)	atp9(+)	ccmB(+)	ccmC(+)	ccmFC(+)	ccmFN(+)	cob(+)	cox1(+)	cox2(+)	cox3(+)	matR(+)	mttB(+)	nad1(+)	nad2(+)	nad3(+)	nad4(+)	nad4L(+)	nad5(+)	nad6(+)	nad7(+)	nad9(+)	rpl10(+)	rpl16(-)	rpl5(+)	rps12(+)	rps13(+)
PP857827.1	atp1(+)	atp4(+)	atp6(+)	atp8(+)	atp9(+)	ccmB(+)	ccmC(+)	ccmFC(+)	ccmFN(+)	cob(+)	cox1(+)	cox2(+)	cox3(+)	matR(+)	mttB(+)	nad1(+)	nad2(+)	nad3(+)	nad4(+)	nad4L(+)	nad5(+)	nad6(+)	nad7(+)	nad9(+)	rpl10(+)	rpl16(+)	rpl5(+)	rps12(+)	rps13(+)
PP968945.1	atp1(+)	atp4(+)	atp6(+)	atp8(+)	atp9(+)	ccmB(+)	ccmC(+)	ccmFC(+)	ccmFN(+)	cob(+)	cox1(+)	cox2(+)	cox3(+)	matR(+)	mttB(+)	nad1(+)	nad2(+)	nad3(+)	nad4(+)	nad4L(+)	nad5(+)	nad6(+)	nad7(+)	nad9(+)	rpl10(+)	rpl16(+)	rpl5(+)	rps12(+)	rps13(+)
PQ273107.1	atp1(+)	atp4(+)	atp6(+)	atp8(+)	atp9(+)	ccmB(+)	ccmC(+)	ccmFC(+)	ccmFN(+)	cob(+)	cox1(+)	cox2(+)	cox3(+)	matR(+)	mttB(+)	nad1(+)	nad2(+)	nad3(+)	nad4(+)	nad4L(+)	nad5(+)	nad6(+)	nad7(+)	nad9(+)	rpl10(+)	rpl16(+)	rpl5(+)	rps12(+)	rps13(+)
PQ399811.1	atp1(+)	atp4(+)	atp6(+)	atp8(+)	atp9(+)	ccmB(+)	ccmC(+)	ccmFC(+)	ccmFN(+)	cob(+)	cox1(+)	cox2(+)	cox3(+)	matR(+)	mttB(+)	nad1(+)	nad2(+)	nad3(+)	nad4(+)	nad4L(+)	nad5(+)	nad6(+)	nad7(+)	nad9(+)	rpl10(+)	rpl16(-)	rpl5(+)	rps12(+)	rps13(+)
Proportion	0.939394	0.939394	0.969697	0.969697	0.909091	0.909091	0.969697	0.969697	0.969697	0.969697	0.969697	0.939394	0.969697	0.969697	0.939394	0.909091	0.939394	0.969697	0.939394	0.969697	0.969697	0.969697	0.939394	0.969697	0.939394	0.727273	0.848485	0.939394	0.878788
Note	"+" : gene present; "-" : gene absent
